# Supplementary material for: Chinese version of the Perceived Stress Scale-10: A psychometric study in Chinese university students
Source: PLoS One. 2017 Dec 18;12(12):e0189543. doi: 10.1371/journal.pone.0189543 (PMC5734731; doi:10.1371/journal.pone.0189543)
Supplement: S2 Table — (XLSX) [file pone.0189543.s002.xlsx]

## Sheet: 整理
No.	Name	Sex	PHQ_1	PHQ_2	PHQ_3	PHQ_4	PHQ_5	PHQ_6	PHQ_7	PHQ_8	PHQ_9	PHQ_F(1-毫无困难;2-有点困难;3-非常困难;4-极度困难)	PHQ9（Total）	GAD_1	GAD_2	GAD_3	GAD_4	GAD_5	GAD_6	GAD_7	GAD7（总）	PSS_1	PSS_2	PSS_3	PSS_4	PSS_5	PSS_6	PSS_7	PSS_8	PSS_9	PSS_10
5111419001		female	0	1	0	2	0	1	2	0	0	1	6	1	1	1	0	0	0	0	3	1	3	3	3	1	4	4	4	3	2
5111419002		female	0	1	0	3	1	3	1	0	0	2	9	2	1	1	1	0	1	2	8	3	3	3	2	2	3	3	2	3	3
5111419004		female	0	0	1	1	0	0	0	0	0	1	2	0	0	0	0	0	0	0	0	1	2	2	2	2	1	3	3	2	2
5111419005		female	1	0	1	1	0	0	0	0	0	1	3	0	0	1	0	0	0	0	1	1	2	1	3	3	2	4	4	1	0
5111419006		female	1	0	0	1	0	0	0	0	0	1	2	1	0	0	0	0	0	0	1	1	0	1	3	3	0	3	3	1	1
5111419009		female	1	1	1	1	1	1	1	0	0	2	7	1	1	1	0	1	1	0	5	2	2	1	2	2	2	3	3	2	2
5111419011		female	1	1	3	1	0	1	1	0	0	1	8	1	1	1	0	0	0	0	3	2	2	2	2	2	2	2	2	2	2
5111419012		female	0	0	0	1	1	0	0	0	0	1	2	0	0	1	0	0	0	0	1	2	1	2	3	2	2	3	3	1	2
5111419014		female	0	1	1	1	0	0	0	0	0	2	3	1	1	0	1	0	0	0	3	1	1	1	3	3	1	4	3	1	1
5111419015		female	1	0	2	2	1	1	1	0	0	1	8	1	1	2	2	2	1	0	9	2	2	2	2	2	2	3	3	2	2
5111419016		female	1	0	0	0	0	0	0	0	0	1	1	0	0	0	0	0	0	0	0	1	0	0	4	3	1	4	4	1	1
5111419017		female	0	1	0	1	0	2	1	0	1	1	6	1	1	2	1	0	0	0	5	2	1	3	3	1	2	3	2	2	3
5111419018		female	0	1	1	1	0	1	0	0	0	1	4	1	1	1	1	0	0	0	4	1	1	2	2	3	0	3	3	1	2
5111419037		female	1	1	0	1	0	0	0	0	0	2	3	1	0	0	0	0	1	0	2	1	1	1	3	3	1	3	3	2	0
5111419039		female	0	0	0	1	1	0	0	0	0	1	2	1	0	0	0	0	1	0	2	3	2	2	3	3	2	3	3	1	2
5111419042		female	1	0	0	1	1	0	0	0	0	1	3	0	0	0	0	0	0	0	0	2	2	1	4	3	1	3	3	1	1
5111419044		female	1	1	0	1	0	1	1	0	0	1	5	1	1	1	0	0	1	0	4	2	3	2	1	1	2	2	2	2	2
5111419045		female	1	1	1	1	1	1	1	0	0	2	7	1	0	1	0	0	0	0	2	2	2	2	3	2	3	4	3	2	2
5111419046		female	0	0	0	0	0	0	0	0	0	0	0	0	0	1	0	0	0	0	1	1	1	1	4	4	1	3	4	1	1
5111419047		female	2	1	0	1	0	0	0	0	0	1	4	1	0	0	0	0	1	0	2	1	3	3	2	2	1	4	3	1	1
5111419049		female	0	0	0	0	0	0	0	0	0	0	0	0	0	0	0	0	0	0	0	0	1	1	2	2	1	4	4	1	2
5111419050		female	1	1	0	1	0	1	0	0	0	2	4	1	1	0	0	0	0	0	2	1	2	1	3	2	1	4	2	2	1
5111419051		female	1	0	0	0	0	0	0	0	0	1	1	0	0	0	0	0	0	0	0	0	0	1	4	3	0	4	4	1	0
5111419052		female	1	1	0	1	3	0	1	0	0	1	7	1	0	0	0	0	0	0	1	1	1	2	3	3	1	2	2	2	1
5111419054		female	2	1	1	1	1	2	0	0	0	2	8	2	2	2	2	2	2	0	12	3	2	3	2	2	2	3	2	2	2
5111429001		female	0	0	0	0	0	0	0	0	0	0	0	1	1	1	1	1	1	1	7	1	1	1	1	1	1	1	1	1	1
5111429002		female	1	1	0	1	0	0	0	0	0	1	3	1	1	0	0	0	0	1	3	2	1	1	3	3	1	4	3	1	1
5111429003		female	1	1	1	1	1	1	1	0	0	2	7	1	0	1	1	0	0	0	3	2	2	2	2	3	2	2	2	2	2
5111429005		female	1	1	1	1	1	1	1	1	0	1	8	2	1	1	1	1	1	0	7	1	1	1	1	1	1	1	1	1	1
5111429006		female	1	1	0	1	1	1	1	0	0	1	6	1	0	0	0	0	0	0	1	1	2	2	3	3	1	3	3	1	2
5111429007		female	0	0	0	0	0	0	0	0	0	0	0	0	0	0	0	0	0	0	0	1	1	1	3	3	1	3	3	1	1
5111429008		female	1	1	0	1	1	0	0	0	0	1	4	1	0	0	0	0	0	0	1	2	1	1	3	3	1	3	4	2	2
5111429009		female	1	2	0	2	1	1	0	0	0	2	7	1	1	1	1	0	1	0	5	2	1	4	2	1	2	4	3	1	1
5111439001		female	1	0	1	1	0	0	0	0	0	1	3	1	0	1	0	0	0	0	2	1	1	2	3	3	2	4	3	1	2
5111439006		female	0	1	1	0	1	1	0	0	0	1	4	1	1	1	0	0	1	0	4	2	1	2	3	2	1	3	3	1	1
5111439007		female	2	1	0	3	0	1	1	2	0	2	10	0	2	3	3	0	1	0	9	2	3	2	2	1	1	2	2	3	3
5111439011		female	1	1	0	1	1	1	0	0	0	2	5	1	0	1	1	0	1	0	4	3	2	3	1	1	2	3	2	2	2
5111439013		female	1	1	1	1	1	0	0	1	0	2	6	1	0	0	1	0	1	0	3	1	1	2	2	1	1	4	2	0	2
5111439014		female	1	1	0	1	0	0	1	2	0	2	6	1	0	2	2	0	1	0	6	2	3	3	3	2	2	2	2	3	3
5111439016		female	1	1	1	1	1	0	1	1	0	1	7	1	0	0	0	0	0	0	1	1	2	1	3	3	1	3	3	1	1
5111439018		female	1	1	1	2	2	1	1	1	0	2	10	1	0	1	1	0	2	2	7	2	3	2	2	2	2	3	2	1	2
5111439019		female	1	2	1	1	0	0	1	0	0	2	6	1	1	1	1	0	1	0	5	1	1	2	2	2	2	1	2	2	2
5111419032		male	2	1	2	1	2	2	0	0	0	2	10	1	1	1	2	0	1	1	7	3	3	3	2	1	3	4	2	3	3
5111429015		male	1	0	0	1	1	0	0	0	0	1	3	0	0	0	1	0	0	0	1	2	1	1	2	2	2	2	1	1	2
5111439021		male	0	1	3	2	2	0	0	0	0	2	8	1	0	0	0	0	0	0	1	1	2	2	3	3	1	2	3	2	3
5111439022		male	2	1	0	1	0	1	0	1	0	2	6	2	1	2	2	2	2	0	11	2	2	2	1	2	2	3	2	2	2
5110719001		female	1	1	1	1	2	1	1	1	0	1	9	1	0	2	1	1	1	1	7	2	2	2	2	2	1	2	2	3	2
5110719002		female	2	0	0	2	0	1	0	0	0	1	5	1	1	1	1	0	0	0	4	1	2	3	2	3	2	2	2	1	2
5110719004		female	1	1	1	1	0	0	0	0	0	1	4	1	0	1	1	0	1	0	4	2	2	1	3	2	2	4	2	2	1
5110719005		female	1	0	2	1	1	1	1	0	0	2	7	0	1	0	0	0	0	0	1	1	1	2	3	2	1	4	3	1	1
5110719025		female	1	1	0	1	1	0	0	0	0	2	4	1	1	1	1	0	0	1	5	2	2	1	3	3	1	4	3	1	1
5110719031		female	0	1	0	1	1	0	1	0	0	1	4	1	1	1	1	0	0	0	4	0	2	2	4	3	2	4	3	0	1
5110719049		female	0	0	0	1	1	0	0	0	0	1	2	0	0	0	0	0	0	0	0	3	3	3	4	1	3	2	2	3	3
5110719051		female	2	2	3	2	0	0	0	0	0	2	9	2	2	2	2	2	2	0	12	3	2	4	3	2	2	4	2	1	3
5110719052		female	1	1	1	1	0	0	0	1	0	1	5	0	0	0	0	0	0	0	0	1	1	1	4	3	1	4	4	1	1
5110719053		female	1	1	0	1	1	0	0	0	0	1	4	1	0	0	0	0	1	1	3	2	2	1	3	2	1	3	3	1	1
5110719054		female	1	0	1	0	1	0	0	1	0	2	4	1	0	0	0	0	1	0	2	1	2	2	3	3	2	3	3	1	1
5110719056		female	1	0	0	1	1	0	0	0	0	1	3	0	0	0	0	0	0	0	0	1	3	1	2	3	1	3	2	1	1
5110719075		female	0	0	0	0	0	0	0	0	0	0	0	0	0	0	0	0	0	0	0	2	1	2	3	2	1	4	3	1	1
5110719076		female	0	0	0	0	1	0	0	0	0	1	1	0	0	0	0	0	0	0	0	1	0	0	4	3	1	3	3	1	1
5110719077		female	0	0	0	0	0	0	0	1	0	1	1	0	0	0	1	1	0	0	2	2	2	2	3	3	2	4	3	2	1
5110719078		female	0	0	0	1	1	1	0	0	0	1	3	0	0	0	0	0	0	0	0	0	0	1	4	4	1	2	4	2	1
5110719079		female	1	1	0	2	1	1	0	1	1	2	8	1	1	1	1	1	1	0	6	2	2	3	2	2	2	3	2	2	3
5110719080		female	1	1	0	1	0	1	1	1	0	2	6	1	1	1	1	1	1	1	7	2	2	1	1	2	2	3	2	2	2
5110719082		female	1	1	1	0	0	1	0	0	0	1	4	0	0	0	0	0	0	0	0	2	2	2	3	3	1	4	3	2	2
5110719050		female	1	1	0	1	1	1	1	0	0	2	6	1	0	1	1	0	0	0	3	2	2	1	2	2	3	3	3	0	2
5110309031		male	0	0	0	0	0	0	0	0	0	0	0	0	0	0	0	0	0	0	0	0	0	0	4	4	0	4	4	0	0
5110719014		male	2	2	0	0	0	1	0	1	0	1	6	2	2	1	1	0	1	0	7	2	2	2	3	2	1	2	2	3	4
5110719017		male	1	0	0	1	0	1	0	0	0	2	3	1	1	0	1	0	1	0	4	2	2	2	2	2	2	3	3	1	1
5110719018		male	0	1	0	0	0	0	1	0	0	1	2	0	0	0	0	0	0	0	0	2	1	1	3	2	1	3	4	1	2
5110719019		male	1	1	0	1	1	1	0	0	0	2	5	1	0	1	1	0	1	1	5	2	2	2	3	2	2	2	2	2	2
5110719020		male	1	0	0	1	0	0	0	0	0	1	2	1	0	0	1	0	0	0	2	1	1	1	3	3	1	4	3	0	2
5110719022		male	0	0	1	1	0	0	1	0	0	1	3	1	0	0	0	0	0	0	1	4	1	1	4	4	1	4	4	1	1
5110719070		male	0	0	0	1	1	1	0	0	0	1	3	0	0	0	0	0	0	0	0	1	2	1	3	2	1	3	3	1	1
5110719072		male	1	1	1	1	0	0	0	0	0	1	4	0	1	0	1	0	0	0	2	1	1	1	3	3	1	4	3	1	1
5110719090		male	0	0	0	0	0	0	0	0	0	0	0	0	0	0	0	0	0	0	0	0	0	1	3	3	3	4	4	1	0
5110719091		male	1	1	1	1	1	0	1	0	0	1	6	0	0	0	0	0	0	0	0	3	3	3	4	2	2	4	4	1	1
5110719092		male	1	0	0	1	0	0	0	0	0	1	2	0	0	0	0	0	0	0	0	1	1	2	3	3	1	4	3	1	1
5110719097		male	0	1	1	1	1	1	2	0	0	2	7	1	0	0	0	0	0	0	1	1	1	1	2	1	1	3	3	1	1
5110719098		male	1	1	3	0	1	0	1	1	1	2	9	1	1	1	1	1	0	0	5	3	1	3	3	3	1	3	3	1	1
5110719037		male	1	1	0	1	0	0	1	0	0	1	4	0	0	0	0	0	0	0	0	1	2	2	2	2	2	3	2	1	2
5110719040		male	1	1	0	1	0	0	0	0	0	1	3	1	0	0	0	0	0	0	1	1	1	2	3	3	1	4	3	1	1
5110719041		male	1	2	0	1	0	1	0	0	0	2	5	1	1	1	1	0	0	0	4	3	3	3	3	1	3	2	2	2	2
5110719044		male	1	1	1	1	1	0	1	1	0	1	7	1	0	1	1	1	1	0	5	2	2	2	2	2	2	2	2	2	2
5110719046		male	1	0	0	1	0	0	0	0	0	1	2	1	0	0	0	0	0	0	1	0	0	1	4	4	0	4	4	1	0
5110719064		male	1	1	1	1	1	1	1	1	0	1	8	1	1	1	1	1	1	1	7	1	1	1	1	1	1	1	1	1	1
5110719067		male	0	0	1	0	1	0	1	0	0	1	3	1	0	0	0	0	0	0	1	2	2	2	3	4	1	4	3	1	1
5110719069		male	0	0	1	1	0	0	1	0	0	1	3	0	0	0	0	0	0	0	0	2	0	0	2	3	1	3	2	0	1
5110719071		male	1	1	1	1	1	0	0	0	0	2	5	1	0	1	0	0	0	0	2	2	0	2	3	3	1	3	4	2	2
5110719085		male	1	1	1	1	1	1	1	1	0	2	8	1	1	1	1	1	1	1	7	2	2	2	2	2	2	2	2	2	2
5110719086		male	1	0	0	0	1	1	0	0	0	2	3	1	1	0	0	0	0	0	2	1	2	2	3	2	2	1	3	2	1
5110719089		male	0	0	0	0	0	0	0	0	0	0	0	0	0	0	0	0	0	0	0	0	0	0	4	4	0	0	4	0	0
5110719094		male	1	2	1	1	1	0	1	0	0	2	7	1	0	0	0	0	0	0	1	2	2	2	2	2	2	2	2	2	2
5110719096		male	0	0	0	1	0	0	1	0	0	1	2	0	0	0	0	0	0	0	0	0	0	0	3	3	1	3	3	1	1
5110719099		male	1	1	1	1	1	1	0	0	0	2	6	1	0	0	0	0	1	0	2	1	0	0	3	3	0	3	4	1	0
5110809001		female	1	0	0	0	0	1	1	1	0	1	4	0	0	0	0	0	1	0	1	0	2	2	2	2	2	3	2	2	2
5110809003		female	1	0	0	0	1	0	0	0	0	1	2	0	0	0	0	0	0	0	0	2	0	1	4	3	1	3	4	2	2
5110809004		female	1	1	1	1	1	1	1	3	0	1	10	1	1	1	1	1	1	0	6	1	1	2	3	3	1	2	2	2	1
5110809005		female	1	0	0	2	1	0	0	0	0	2	4	0	0	1	1	0	0	0	2	1	1	0	4	4	1	3	3	2	2
5110809029		female	1	1	1	1	1	1	1	1	0	1	8	1	2	2	1	1	2	2	11	2	1	2	3	3	1	3	3	3	2
5110809032		female	0	0	0	0	0	0	0	0	0	0	0	0	0	0	0	0	0	0	0	0	0	2	4	3	1	4	4	0	0
5110809049		female	1	0	0	2	1	0	2	0	0	2	6	1	1	1	0	0	1	0	4	2	2	2	2	1	2	2	1	2	3
5110809051		female	1	1	2	3	1	0	2	1	1	3	12	1	3	3	2	1	1	1	12	1	3	2	2	2	2	4	3	2	1
5110809052		female	1	1	1	1	0	2	0	0	0	2	6	1	1	1	1	0	1	0	5	2	2	2	2	2	2	3	3	2	2
5110809006		female	1	1	0	1	0	2	0	0	0	1	5	1	0	0	0	0	0	0	1	1	1	1	2	2	2	3	3	1	2
5110809007		female	1	1	0	1	1	1	0	1	0	2	6	1	1	1	1	0	1	0	5	0	2	2	1	3	2	3	2	2	2
5110809026		female	0	1	1	0	1	1	1	0	0	1	5	0	0	1	0	0	1	0	2	1	0	2	3	3	0	2	3	2	1
5110809027		female	2	1	0	0	0	1	0	0	0	1	4	1	0	1	0	0	0	0	2	2	2	2	3	3	1	4	3	1	2
5110809028		female	0	0	1	2	0	1	2	0	0	1	6	1	2	2	2	0	1	0	8	4	4	3	3	3	1	3	3	2	2
5110809047		female	1	0	0	1	0	0	0	0	0	1	2	1	0	0	0	0	0	0	1	1	1	1	3	3	1	4	3	2	1
5110809054		female	0	1	3	2	0	1	1	0	0	2	8	1	0	0	3	0	1	0	5	4	3	4	2	1	3	1	4	3	4
5110809011		male	1	0	1	1	0	1	0	0	0	1	4	1	0	1	0	0	0	0	2	2	2	2	4	3	1	4	3	0	2
5110809012		male	0	0	0	1	1	0	0	0	0	1	2	1	0	1	0	0	1	0	3	0	1	1	4	3	0	4	3	1	1
5110809013		male	1	1	0	3	0	0	1	0	0	2	6	0	1	1	2	0	1	0	5	2	4	2	3	2	2	2	2	3	3
5110809014		male	0	0	0	0	0	0	0	0	0	0	0	0	0	0	0	0	0	0	0	1	3	1	3	3	1	3	3	1	1
5110809016		male	0	0	0	0	0	0	0	0	0	0	0	0	0	0	0	0	0	0	0	1	1	2	3	3	1	4	3	1	1
5110809017		male	1	1	0	1	0	0	0	0	0	2	3	0	0	0	0	0	0	0	0	1	1	1	3	3	1	4	3	2	2
5110809018		male	1	1	1	1	1	1	0	0	0	2	6	1	1	1	1	1	1	1	7	1	1	1	4	4	4	4	4	1	0
5110809021		male	1	0	0	1	1	0	0	0	0	1	3	0	0	0	0	0	1	0	1	2	3	2	3	3	2	2	2	2	2
5110809034		male	1	1	0	2	1	1	0	0	0	1	6	1	0	0	0	0	0	0	1	1	1	2	4	3	2	4	4	0	1
5110809036		male	1	0	0	1	1	0	1	0	0	2	4	1	1	0	0	0	0	0	2	1	1	2	4	3	3	4	3	1	1
5110809037		male	1	1	0	1	1	1	0	0	0	1	5	0	0	0	1	0	0	0	1	1	1	3	4	2	1	4	4	1	1
5110809043		male	1	0	1	1	1	0	1	0	0	1	5	1	0	1	1	0	0	0	3	2	1	2	3	2	2	3	3	2	2
5110809056		male	1	1	0	1	0	0	0	0	0	2	3	1	0	0	0	0	0	0	1	1	1	2	3	3	1	3	3	2	1
5110809057		male	0	0	0	1	1	1	0	1	0	2	4	0	0	1	1	0	1	0	3	4	1	1	3	0	2	4	4	1	2
5110809058		male	3	1	0	1	0	1	0	0	0	1	6	2	2	2	0	0	1	0	7	1	2	2	1	3	1	2	2	2	2
5110809059		male	0	0	1	1	0	0	1	0	0	1	3	0	1	1	1	0	0	0	3	1	0	2	3	3	1	4	3	2	2
5110809063		male	1	0	0	1	1	1	2	0	0	1	6	1	1	0	1	0	0	0	3	1	1	2	4	4	2	4	4	1	1
5110809064		male	0	1	0	1	0	1	0	0	0	1	3	0	0	0	0	0	0	0	0	1	1	1	2	2	2	2	2	2	2
5110809066		male	0	0	0	1	0	1	1	0	0	1	3	1	0	0	0	1	0	0	2	2	1	2	3	3	1	4	4	1	1
5110809038		male	1	1	0	1	0	0	0	0	0	1	3	0	0	0	0	0	0	0	0	1	1	1	3	3	2	4	3	0	1
5110809039		male	1	1	0	1	0	1	1	1	0	2	6	1	1	1	1	1	1	1	7	1	1	1	1	1	1	1	1	1	1
5110809040		male	1	1	1	1	1	1	0	0	0	1	6	1	1	1	1	0	1	0	5	2	2	2	3	2	1	4	3	2	2
5111509046		female	0	1	0	0	0	1	0	0	0	1	2	1	0	0	0	0	0	0	1	2	1	1	3	2	0	2	3	2	1
5113709001		female	1	1	0	1	0	0	0	0	0	1	3	1	0	1	0	0	1	0	3	2	1	2	3	3	2	3	3	2	2
5113709002		female	1	1	0	1	1	0	0	0	0	1	4	0	0	0	0	0	0	0	0	2	2	2	3	3	1	4	3	1	2
5113709003		female	3	2	0	1	0	1	0	0	0	1	7	1	1	1	1	0	1	0	5	1	2	3	1	2	2	2	2	2	3
5113709004		female	2	1	2	1	3	1	1	0	0	1	11	1	0	1	1	1	1	0	5	2	1	3	4	3	2	4	3	0	4
5113709005		female	1	1	0	1	1	1	1	0	0	2	6	1	0	1	0	0	1	0	3	3	3	3	2	1	3	2	2	3	3
5113709006		female	0	1	1	1	1	1	1	0	0	1	6	1	0	1	1	0	1	1	5	1	1	2	3	1	1	3	3	1	1
5113709007		female	0	0	0	0	0	0	0	0	0	0	0	0	1	1	0	0	0	0	2	1	1	1	2	3	1	4	3	0	1
5113709032		female	0	0	0	1	2	0	1	0	0	1	4	0	0	0	1	0	0	0	1	1	0	2	3	3	1	3	3	2	1
5113709033		female	1	1	0	1	1	0	0	0	0	2	4	1	1	0	0	1	0	0	3	2	1	2	3	1	1	4	3	2	1
5113709034		female	0	0	1	0	0	0	0	0	0	1	1	1	0	0	0	0	0	0	1	2	1	2	3	2	1	2	2	2	1
5113709035		female	1	0	0	1	1	1	0	0	0	2	4	1	0	1	0	0	0	0	2	3	2	2	3	3	2	4	4	1	4
5113709036		female	1	0	1	1	1	0	0	1	0	1	5	1	0	1	0	0	1	0	3	0	0	3	4	3	0	4	4	1	1
5113709059		female	1	1	1	1	1	2	2	1	1	2	11	1	1	1	1	1	1	2	8	2	2	2	2	2	2	2	2	2	2
5113709060		female	0	0	0	1	1	0	0	0	0	1	2	1	0	0	0	0	0	0	1	2	2	2	3	3	1	3	2	1	2
5113709061		female	1	1	0	1	1	1	0	0	0	1	5	0	0	1	0	0	0	0	1	2	1	1	3	3	1	4	3	1	1
5113709062		female	2	1	0	1	0	0	1	0	0	1	5	1	1	1	1	0	0	0	4	2	2	2	2	2	2	2	2	2	2
5113709064		female	1	1	0	1	1	0	1	0	0	1	5	1	0	0	1	0	1	0	3	2	2	3	3	3	2	3	3	2	2
5113709065		female	0	1	0	0	0	0	0	0	0	1	1	0	0	0	0	0	0	0	0	1	1	1	3	3	1	4	3	1	1
5113709090		female	1	0	0	1	1	1	0	0	0	1	4	0	0	0	0	0	1	0	1	0	0	0	3	3	1	4	4	1	0
5113709092		female	0	0	0	1	0	0	0	0	0	1	1	0	0	0	0	0	0	0	0	1	1	1	4	3	0	3	3	0	1
5113709093		female	0	0	0	0	0	0	0	0	0	0	0	0	0	0	0	0	0	0	0	0	0	0	0	0	0	0	0	0	0
5113709094		female	0	1	0	1	0	1	0	0	0	1	3	1	0	0	0	0	0	0	1	0	0	0	0	0	0	0	0	0	0
5113709119		female	0	1	0	1	0	0	0	0	0	1	2	0	0	0	0	0	0	0	0	1	0	0	4	4	0	4	4	1	0
5113709120		female	1	0	0	1	1	0	0	0	0	1	3	1	1	1	0	0	0	0	3	1	1	2	2	2	1	3	2	1	1
5113709121		female	1	1	0	0	0	0	0	0	0	1	2	1	1	0	0	0	1	0	3	2	2	2	2	2	2	2	2	2	2
5113709122		female	1	1	0	1	1	1	1	0	1	1	7	1	1	1	0	1	0	0	4	1	1	1	4	3	1	3	3	1	1
5113709123		female	1	1	1	1	0	0	0	1	0	1	5	1	1	1	1	0	1	0	5	2	2	2	3	2	2	2	3	2	1
5113709124		female	0	0	0	1	0	0	0	0	0	1	1	0	0	0	0	0	0	0	0	0	0	1	4	4	1	4	3	1	1
5113709125		female	1	2	1	1	0	1	1	0	0	2	7	1	1	1	1	0	1	0	5	2	2	2	2	2	1	4	2	0	2
5113709149		female	0	1	0	1	1	0	0	0	0	1	3	1	0	0	0	0	0	0	1	2	2	1	3	2	2	2	2	2	2
5113709150		female	0	0	0	1	0	0	0	0	0	1	1	1	0	0	0	0	0	0	1	1	1	1	3	3	1	3	3	1	1
5113709152		female	2	2	0	2	2	3	3	0	0	3	14	3	3	3	3	0	3	1	16	2	2	2	2	2	2	2	2	2	2
5113709154		female	1	1	0	1	2	0	0	1	0	2	6	1	0	1	2	1	1	0	6	1	1	2	3	3	1	4	3	1	2
5113709179		female	1	1	1	1	1	1	1	0	0	1	7	1	1	0	1	0	0	0	3	2	2	2	2	2	2	2	2	2	2
5113709180		female	1	1	0	0	0	0	0	0	0	1	2	0	0	0	0	0	0	0	0	1	1	1	3	3	1	2	3	1	1
5113709181		female	0	0	0	0	0	1	1	0	0	1	2	1	0	1	0	0	1	0	3	3	3	3	3	2	1	3	3	3	1
5113709208		female	1	1	1	1	0	1	0	0	0	1	5	1	1	1	1	0	1	1	6	2	2	1	2	3	1	4	3	1	2
5113709209		female	0	0	0	1	0	1	1	0	0	1	3	1	1	1	1	0	1	0	5	2	2	3	4	3	1	4	2	2	1
5113709210		female	2	3	2	2	3	3	2	1	3	2	21	2	2	3	2	2	3	3	17	3	3	3	1	1	2	1	1	3	3
5113709212		female	1	1	3	2	3	1	1	1	0	2	13	1	1	1	2	1	2	1	9	2	2	3	2	2	1	2	2	2	2
5113709213		female	1	1	1	1	1	1	0	0	1	1	7	1	1	1	1	0	1	0	5	2	2	2	2	2	2	2	2	2	2
5113709237		female	1	1	1	1	0	1	1	0	0	2	6	1	1	3	2	1	1	1	10	2	2	2	3	3	1	4	4	1	1
5113709238		female	0	0	1	1	1	0	1	0	0	1	4	0	0	0	0	0	0	0	0	2	2	2	2	2	2	2	2	2	2
5113709239		female	0	1	0	1	0	0	0	0	0	1	2	1	1	1	1	0	0	0	4	1	0	1	4	4	0	4	4	1	1
5113709240		female	0	0	1	1	0	0	0	0	0	1	2	0	0	0	0	0	0	0	0	1	1	1	4	3	1	3	3	1	1
5113709241		female	1	1	1	1	1	0	1	0	0	2	6	1	0	1	0	0	0	1	3	2	2	2	4	3	1	4	4	1	1
5113709242		female	1	1	0	1	0	0	0	0	0	2	3	0	0	0	0	0	0	0	0	1	1	1	4	3	0	4	3	1	2
5113709151		female	1	0	0	1	0	0	0	0	0	1	2	0	0	0	1	0	1	0	2	1	0	1	4	3	0	4	4	1	2
5110309006		male	0	0	0	0	0	0	0	0	0	0	0	0	0	0	0	0	0	0	0	0	0	0	4	4	0	4	4	4	0
5110309040		male	1	1	1	1	1	1	1	1	0	2	8	1	1	1	1	1	1	1	7	2	1	2	2	2	2	4	2	2	2
5111619027		male	1	1	2	1	3	0	1	1	0	2	10	1	0	1	0	0	0	0	2	2	1	1	2	2	1	3	3	1	2
5113709008		male	0	0	0	0	0	0	0	0	0	0	0	0	0	0	0	0	0	0	0	0	0	0	0	0	0	0	0	0	0
5113709009		male	1	1	1	1	0	0	1	0	0	1	5	1	0	0	0	0	1	0	2	2	2	2	4	3	1	1	2	3	0
5113709010		male	1	0	0	0	0	0	1	0	0	1	2	1	0	0	0	0	0	0	1	1	0	1	4	4	0	3	3	1	0
5113709012		male	0	0	0	0	0	0	0	0	0	0	0	0	0	0	0	0	0	0	0	0	0	0	4	4	0	4	4	0	0
5113709013		male	0	0	1	1	1	0	0	0	0	1	3	1	0	0	0	0	0	0	1	2	1	2	3	2	1	3	4	1	1
5113709014		male	0	0	0	0	0	0	0	0	0	0	0	0	0	0	0	0	0	0	0	1	2	1	3	3	1	1	3	2	1
5113709017		male	1	1	0	1	1	0	1	1	0	1	6	1	1	1	1	0	1	0	5	1	2	2	2	2	1	3	2	2	2
5113709019		male	2	2	0	2	1	1	1	1	0	3	10	2	2	2	3	1	2	0	12	2	2	2	2	2	2	2	2	2	2
5113709020		male	1	1	0	1	0	0	0	0	0	1	3	1	0	0	0	0	0	0	1	2	1	1	3	3	1	3	3	1	1
5113709023		male	1	0	0	0	0	0	1	0	0	1	2	0	0	0	0	0	1	0	1	2	2	1	3	2	2	2	2	1	3
5113709024		male	1	1	1	1	1	1	1	1	0	1	8	1	1	1	1	1	1	0	6	2	2	1	3	2	1	3	2	2	2
5113709026		male	0	1	0	0	1	0	1	0	0	2	3	1	0	1	0	0	1	0	3	1	1	2	4	4	0	3	3	1	2
5113709027		male	1	0	0	2	0	1	2	1	0	2	7	0	1	0	1	0	1	0	3	3	2	2	2	2	2	1	2	2	3
5113709028		male	0	0	0	0	0	0	0	0	0	0	0	0	0	0	0	0	0	0	0	1	1	1	3	3	1	3	3	1	1
5113709037		male	1	0	0	1	0	0	1	0	0	1	3	1	1	0	0	1	0	0	3	2	1	1	3	2	1	3	3	1	1
5113709038		male	1	1	1	1	1	1	1	1	1	1	9	1	1	1	1	1	1	1	7	2	2	2	2	2	2	2	2	2	2
5113709039		male	0	0	0	0	1	0	0	0	0	1	1	0	0	0	0	0	0	0	0	2	2	1	3	3	1	3	3	2	1
5113709040		male	0	1	1	2	0	1	0	0	0	2	5	1	1	1	0	0	0	1	4	1	2	2	2	3	2	3	2	2	2
5113709042		male	1	1	0	1	1	1	1	0	0	2	6	1	1	1	1	1	0	0	5	2	3	3	2	2	2	4	3	1	2
5113709043		male	2	0	2	2	0	3	1	1	0	2	11	1	1	3	3	1	1	1	11	3	1	2	2	3	2	2	2	1	3
5113709045		male	1	1	1	1	0	0	0	0	0	1	4	1	0	0	0	0	0	0	1	2	0	2	4	2	1	4	4	1	1
5113709046		male	1	1	0	1	1	0	1	0	0	1	5	1	0	1	0	0	1	0	3	1	2	2	2	3	3	2	2	2	2
5113709047		male	0	0	0	0	1	0	0	0	0	1	1	0	0	0	0	0	0	0	0	1	1	1	3	3	1	4	4	1	2
5113709048		male	0	0	0	0	1	0	0	0	0	1	1	0	0	0	0	0	0	0	0	0	1	1	3	3	1	3	3	0	1
5113709049		male	1	1	0	1	1	1	1	0	0	1	6	1	0	1	0	0	0	0	2	2	1	1	3	3	1	2	3	2	2
5113709053		male	1	1	0	0	0	1	1	1	0	1	5	0	0	0	0	0	0	0	0	2	2	2	3	2	0	4	4	0	0
5113709054		male	0	1	0	0	0	0	0	0	0	1	1	1	0	0	0	0	0	1	2	2	2	2	2	2	2	3	3	1	2
5113709055		male	1	1	1	1	1	0	1	0	0	1	6	1	0	1	0	0	0	0	2	2	2	2	4	3	1	4	4	2	2
5113709056		male	0	0	0	1	1	1	1	0	0	1	4	1	0	1	1	0	0	0	3	2	3	2	2	3	2	3	3	1	2
5113709068		male	1	0	1	0	0	0	0	0	0	1	2	1	0	0	0	0	0	0	1	1	1	2	3	3	1	3	3	1	1
5113709069		male	1	1	0	0	0	0	0	0	0	1	2	1	0	1	1	0	0	0	3	2	3	2	2	1	2	3	2	1	1
5113709070		male	1	1	0	1	0	0	0	0	0	1	3	1	1	0	0	0	0	0	2	0	1	1	4	2	1	3	2	1	0
5113709071		male	1	0	1	1	0	0	1	0	0	2	4	1	0	1	1	0	0	0	3	0	3	2	1	2	1	4	4	1	2
5113709073		male	1	1	0	1	1	0	1	0	0	1	5	1	1	1	1	0	0	2	6	0	2	4	1	2	2	4	2	2	3
5113709074		male	1	1	1	1	0	0	0	0	0	1	4	1	0	2	2	0	0	1	6	0	0	0	0	4	0	0	0	0	0
5113709081		male	1	1	0	1	1	0	1	0	0	1	5	0	0	0	1	1	0	0	2	1	1	1	3	3	1	4	3	0	0
5113709084		male	0	1	1	1	1	1	1	1	0	2	7	1	1	1	1	1	1	0	6	2	2	2	2	2	2	2	2	2	2
5113709086		male	1	1	0	1	0	1	1	0	0	1	5	1	1	0	0	0	0	0	2	1	1	1	2	1	2	4	2	0	1
5113709087		male	1	1	0	1	1	0	0	0	0	1	4	1	1	1	0	0	0	0	3	2	3	3	3	3	2	4	4	2	3
5113709088		male	1	1	2	1	1	1	1	0	0	1	8	0	0	0	0	0	0	0	0	2	2	2	2	1	2	2	2	3	2
5113709096		male	1	0	0	1	0	1	0	0	0	2	3	2	1	2	2	0	0	0	7	2	2	2	3	3	1	4	3	3	1
5113709098		male	1	1	2	1	0	0	1	0	0	2	6	1	1	2	1	1	1	0	7	2	2	2	2	2	2	2	2	2	2
5113709099		male	0	0	0	1	1	1	0	0	0	1	3	1	0	0	0	0	0	0	1	0	0	2	3	3	1	3	3	2	1
5113709101		male	1	1	0	1	0	1	1	0	0	2	5	1	0	1	1	0	0	1	4	3	3	3	3	2	2	2	2	2	2
5113709102		male	2	0	1	2	0	0	0	0	0	1	5	0	0	1	2	0	0	0	3	2	3	2	3	2	1	4	3	0	2
5113709103		male	1	1	1	1	1	1	2	2	0	2	10	1	1	1	1	1	1	1	7	2	2	2	2	2	2	3	2	2	2
5113709105		male	1	1	0	1	0	0	0	0	0	2	3	0	0	1	1	0	1	1	4	2	2	2	2	2	2	2	2	2	2
5113709109		male	0	0	0	0	2	0	1	0	0	1	3	1	0	0	3	0	0	0	4	1	1	1	4	4	1	4	4	2	2
5113709112		male	1	0	0	0	0	0	1	0	0	1	2	1	0	0	0	1	1	0	3	1	1	1	4	3	2	2	3	2	2
5113709113		male	1	1	0	3	0	1	1	1	0	2	8	1	0	1	0	0	0	0	2	2	2	2	2	3	1	4	4	2	1
5113709116		male	0	1	0	1	1	0	0	0	0	1	3	1	1	2	1	0	0	0	5	1	1	2	2	2	1	3	2	2	1
5113709117		male	0	0	0	0	0	0	0	0	0	0	0	0	0	0	0	0	0	0	0	0	0	0	4	4	1	4	4	0	0
5113709118		male	0	0	0	0	1	0	0	0	0	2	1	0	0	0	0	0	0	0	0	0	0	1	3	3	1	3	4	0	0
5113709126		male	1	1	1	1	1	0	1	0	0	1	6	1	0	0	1	0	0	0	2	2	0	1	3	2	1	3	3	1	1
5113709130		male	1	1	0	1	1	0	1	0	0	2	5	1	0	1	0	0	0	0	2	3	2	2	2	2	2	3	2	1	2
5113709131		male	0	0	0	2	2	0	0	0	0	2	4	0	0	1	1	0	0	0	2	2	2	2	3	3	3	3	3	2	3
5113709137		male	1	0	1	1	1	0	1	0	0	1	5	1	0	0	0	0	0	0	1	2	2	2	2	3	1	3	2	2	1
5113709138		male	0	0	0	0	0	0	0	0	0	0	0	0	0	0	0	0	0	0	0	1	1	2	3	3	1	3	3	2	1
5113709139		male	0	0	0	1	0	0	0	0	0	1	1	0	0	0	0	0	0	0	0	1	2	2	2	1	2	3	2	2	2
5113709140		male	1	0	1	2	2	0	0	0	0	1	6	0	0	0	0	0	0	0	0	2	2	2	2	2	2	2	2	2	2
5113709141		male	1	0	0	1	1	1	1	1	0	2	6	0	0	0	0	0	0	0	0	2	2	2	2	2	1	2	2	2	2
5113709142		male	1	1	1	1	1	1	1	0	0	2	7	1	1	1	1	0	0	0	4	2	2	2	1	1	3	3	2	2	3
5113709143		male	3	2	0	0	1	0	0	0	0	2	6	0	0	0	0	0	1	2	3	0	1	0	3	3	3	4	3	2	1
5113709158		male	0	0	0	1	0	0	0	0	0	1	1	0	0	0	0	0	0	0	0	1	0	2	4	3	1	4	4	1	0
5113709159		male	0	1	0	1	1	1	0	0	0	1	4	1	1	1	1	0	0	0	4	2	2	2	3	2	2	2	2	2	2
5113709162		male	0	0	0	1	0	0	0	0	0	1	1	0	0	0	0	0	0	0	0	2	2	2	2	2	2	2	2	2	2
5113709163		male	1	1	1	1	1	1	2	0	0	2	8	1	0	0	1	1	1	1	5	1	1	2	3	3	1	1	3	1	1
5113709164		male	0	0	0	0	0	0	0	0	0	0	0	0	0	0	0	0	0	0	0	2	2	2	2	2	2	2	2	2	2
5113709165		male	1	0	0	1	0	1	0	0	0	2	3	0	0	0	0	0	0	0	0	1	1	1	1	1	1	3	3	2	1
5113709168		male	2	1	2	2	0	0	3	3	0	2	13	0	0	0	3	3	3	0	9	2	3	3	3	3	0	4	4	1	0
5113709170		male	0	1	0	1	1	0	0	0	0	1	3	0	0	0	0	0	0	0	0	0	0	0	4	4	0	3	4	1	0
5113709172		male	0	1	0	1	0	0	0	0	0	1	2	0	0	0	0	0	0	0	0	2	2	2	3	3	1	4	4	1	1
5113709173		male	1	1	1	1	1	1	1	0	0	2	7	1	1	1	1	0	1	0	5	2	2	2	3	3	2	2	2	2	2
5113709189		male	1	1	0	1	1	1	1	0	0	2	6	0	0	1	0	0	0	0	1	1	1	1	4	3	0	4	4	0	1
5113709191		male	0	0	0	1	1	0	0	2	0	2	4	1	0	0	0	0	1	1	3	1	3	2	3	3	1	3	3	3	2
5113709192		male	1	2	0	0	1	0	0	0	0	2	4	1	2	0	0	0	1	1	5	2	2	2	3	3	1	4	3	1	2
5113709193		male	1	1	1	1	0	1	1	0	0	1	6	1	1	0	1	1	0	0	4	1	1	2	2	2	1	0	2	1	1
5113709203		male	1	1	0	1	0	0	1	0	0	1	4	1	0	0	0	0	0	0	1	2	1	3	3	2	1	3	3	2	2
5113709204		male	1	0	0	1	1	0	0	0	0	1	3	1	0	0	0	0	0	0	1	2	1	1	3	2	2	4	3	1	1
5113709214		male	1	1	0	1	1	1	0	0	0	1	5	1	0	1	0	0	1	0	3	2	3	3	2	2	2	2	2	1	1
5113709215		male	1	1	1	3	0	0	1	0	0	2	7	1	1	1	0	0	1	1	5	2	2	2	2	2	2	2	2	2	2
5113709216		male	1	1	0	1	0	0	0	0	0	2	3	2	0	0	0	0	0	0	2	2	2	2	2	1	2	3	2	1	2
5113709218		male	1	1	1	1	0	0	0	0	0	1	4	1	1	0	0	0	1	1	4	1	2	2	3	3	1	4	3	3	1
5113709219		male	0	1	0	1	1	0	0	0	0	1	3	0	0	1	0	0	1	1	3	2	1	1	4	3	1	4	4	2	1
5113709220		male	1	0	0	1	0	0	0	0	0	1	2	1	0	0	0	0	0	0	1	1	1	1	4	4	1	3	4	1	0
5113709222		male	1	1	0	1	1	0	0	0	0	1	4	0	0	0	0	0	0	0	0	1	1	1	4	2	3	3	4	1	1
5113709223		male	1	1	0	1	0	1	0	0	0	1	4	1	0	0	1	0	1	0	3	1	1	2	3	2	2	2	3	2	2
5113709224		male	0	0	1	1	1	0	0	0	0	1	3	1	0	0	0	0	0	0	1	1	1	1	4	3	1	4	4	0	1
5113709225		male	0	0	0	0	0	0	0	0	0	0	0	0	0	0	0	0	0	0	0	1	1	1	1	4	1	4	4	1	1
5113709226		male	0	1	1	2	1	0	0	0	0	1	5	1	1	0	0	0	1	1	4	2	2	2	2	2	2	2	2	2	2
5113709227		male	0	0	1	0	1	0	0	0	0	2	2	1	1	0	0	0	0	0	2	2	2	2	3	2	1	4	3	1	2
5113709228		male	1	1	1	1	1	1	1	1	0	2	8	1	0	1	1	1	0	0	4	2	1	2	3	2	1	3	3	2	1
5113709229		male	0	0	0	0	0	0	1	0	0	1	1	0	0	0	0	0	0	0	0	2	2	2	3	3	1	4	3	1	3
5113709231		male	0	0	0	0	0	0	0	0	0	0	0	0	0	0	0	0	0	0	0	1	1	1	3	3	1	4	3	1	0
5113709232		male	0	0	1	1	1	0	0	0	0	1	3	1	0	0	0	0	0	0	1	1	1	1	4	4	2	3	3	1	1
5113709233		male	1	0	1	1	0	0	1	0	0	1	4	1	0	1	0	0	0	0	2	2	2	2	3	3	2	4	3	1	2
5113709234		male	0	0	0	1	1	0	0	0	0	1	2	0	0	0	0	0	0	0	0	1	0	1	4	3	0	4	4	1	1
5113709243		male	1	1	1	1	0	2	1	0	0	2	7	1	1	1	1	1	1	1	7	3	4	4	1	1	4	4	2	4	4
5113709244		male	1	0	1	1	0	0	0	0	0	2	3	0	0	1	0	0	0	0	1	2	2	2	2	2	2	2	2	2	2
5113709245		male	1	1	1	2	1	1	1	1	0	2	9	1	1	1	2	1	1	0	7	2	2	2	2	2	2	2	2	2	2
5113709246		male	0	0	0	0	0	1	0	0	0	1	1	1	3	0	1	0	0	0	5	2	3	1	3	2	1	3	3	3	1
5113709247		male	1	1	0	1	1	1	0	0	0	1	5	1	1	1	0	0	0	0	3	2	2	1	3	3	1	3	3	1	1
5113709248		male	1	1	1	2	1	0	1	0	0	1	7	1	1	1	1	0	0	0	4	2	2	2	2	2	2	2	2	2	2
5113709249		male	1	0	0	1	1	0	0	0	0	1	3	1	0	0	0	0	0	0	1	1	1	1	3	2	2	3	3	3	1
5113709250		male	1	0	2	1	1	1	1	1	0	1	8	1	1	1	1	0	0	0	4	3	2	1	2	2	2	2	1	2	2
5113709251		male	0	0	0	0	0	0	0	0	0	0	0	0	0	0	0	0	0	0	0	2	2	3	2	2	3	3	3	1	2
5113709252		male	0	0	0	0	0	0	0	0	0	0	0	0	0	0	0	0	0	0	0	0	0	0	4	3	2	4	4	1	1
5113709253		male	0	0	0	1	1	0	0	0	0	1	2	0	0	0	0	0	0	0	0	2	2	2	2	3	2	2	3	3	3
5113709254		male	1	1	1	1	1	1	1	1	1	1	9	1	1	1	1	1	1	1	7	2	2	2	2	2	2	2	2	2	2
5113709255		male	0	0	1	1	1	0	1	0	0	1	4	0	0	0	0	0	0	0	0	1	1	1	3	3	1	3	3	2	2
5113709256		male	1	1	0	1	0	0	0	0	0	2	3	1	1	1	1	1	1	1	7	0	0	0	0	0	0	0	0	0	0
5113709257		male	0	2	1	1	1	1	0	0	0	1	6	0	1	0	1	1	1	1	5	2	2	2	2	2	2	2	2	2	2
5113709258		male	1	0	0	1	0	0	0	1	0	1	3	1	1	0	0	0	0	0	2	1	2	2	2	3	0	4	3	2	2
5113709259		male	1	1	0	1	0	2	0	2	0	1	7	1	2	1	1	2	0	0	7	2	2	3	2	1	3	3	2	3	3
5113709260		male	0	1	1	1	1	1	2	0	0	2	7	2	1	1	3	0	1	0	8	1	2	4	2	2	2	2	3	3	3
5113709261		male	0	0	0	0	0	0	0	0	0	0	0	0	0	0	0	0	0	0	0	0	0	2	4	4	0	4	4	0	1
5113709262		male	1	0	0	0	0	0	1	0	0	1	2	1	0	0	0	0	0	0	1	2	2	1	2	3	1	4	2	1	2
5113709264		male	0	1	1	1	1	0	0	1	0	2	5	1	0	1	0	0	1	0	3	2	2	1	3	3	1	3	3	1	1
5113709265		male	1	1	2	1	2	1	2	2	1	2	13	1	1	2	1	2	0	1	8	2	2	1	1	2	2	3	3	3	2
5112019001		female	0	0	0	0	0	0	0	0	0	0	0	1	0	0	0	0	0	0	1	2	1	1	3	3	1	3	4	1	1
5112019003		female	1	1	0	1	1	0	0	0	0	2	4	1	1	1	1	0	1	0	5	2	1	3	2	2	1	2	3	3	1
5112019005		female	1	1	0	1	1	0	1	1	0	1	6	1	1	0	0	0	1	0	3	2	2	2	4	3	3	3	3	2	2
5112019006		female	1	1	0	1	0	0	1	0	0	1	4	1	0	0	0	0	0	0	1	1	1	1	4	3	1	1	3	1	1
5112019007		female	1	1	0	1	1	0	0	0	0	1	4	0	0	0	0	0	0	0	0	2	1	1	4	3	1	3	3	3	1
5112019011		female	1	1	0	1	0	0	0	0	0	2	3	1	1	1	1	0	1	1	6	2	2	2	3	2	1	3	3	2	2
5112019015		female	1	1	1	1	0	1	1	0	0	1	6	1	1	0	1	0	1	0	4	2	2	2	3	3	1	4	4	2	1
5112019017		female	0	1	0	1	0	0	0	0	0	1	2	1	1	0	0	0	0	0	2	0	1	1	3	3	1	2	3	1	0
5112029001		female	0	1	0	0	1	0	0	1	0	1	3	1	0	0	0	0	1	0	2	1	1	1	2	3	1	3	2	1	1
5112029002		female	1	0	1	1	1	0	1	0	0	1	5	1	0	1	0	0	0	0	2	1	1	1	3	3	1	4	3	0	2
5112029003		female	1	0	0	1	1	1	0	0	0	1	4	0	0	1	1	1	0	0	3	2	1	3	3	3	3	2	2	2	3
5112029004		female	1	0	1	1	0	1	1	0	0	1	5	0	0	0	0	0	0	0	0	2	2	1	2	2	1	4	3	1	1
5112029008		female	1	1	1	1	1	0	1	1	0	1	7	1	0	1	0	1	1	1	5	2	2	2	2	2	1	4	3	2	3
5112039001		female	1	0	0	0	0	0	0	0	0	1	1	0	0	0	0	0	0	0	0	2	0	1	4	3	1	3	3	1	2
5112039003		female	0	0	1	1	0	1	0	0	0	1	3	0	0	0	0	0	1	0	1	2	2	2	2	2	2	2	2	2	2
5112039007		female	0	0	0	0	0	0	0	0	0	0	0	0	0	0	0	0	0	0	0	0	0	0	3	3	1	3	3	2	3
5112039012		female	1	1	0	1	1	0	0	0	0	1	4	0	0	0	0	0	0	0	0	2	2	2	1	2	2	2	2	2	2
5112019004		female	1	1	1	1	1	1	0	0	0	2	6	1	0	0	0	0	1	1	3	2	2	2	2	2	1	3	3	2	2
5112019012		female	1	0	0	2	1	0	0	0	0	2	4	0	0	0	0	0	0	0	0	2	0	2	4	3	1	4	4	1	1
5112019013		female	0	0	1	0	0	0	0	0	0	1	1	0	0	0	0	0	0	0	0	0	2	1	3	3	1	3	3	1	1
5112019014		female	1	1	0	1	1	1	1	1	0	2	7	1	1	1	1	1	1	1	7	1	1	1	2	2	2	2	2	1	1
5112029005		female	1	1	0	0	2	1	0	0	0	2	5	1	0	0	0	0	0	0	1	2	1	2	4	2	1	4	2	3	1
5112029007		female	1	1	0	1	0	0	0	0	0	2	3	1	0	0	0	0	1	0	2	2	1	2	3	3	2	3	3	1	2
5112039005		female	1	1	0	1	0	0	0	0	0	1	3	0	0	0	0	0	1	0	1	1	2	0	1	3	2	4	2	2	1
5112049006		female	0	0	0	1	1	0	0	0	0	1	2	0	0	0	0	0	0	0	0	2	2	1	2	2	1	3	2	2	1
5112059001		female	1	1	1	1	1	1	1	0	0	1	7	1	0	0	0	0	1	0	2	2	2	2	2	2	2	2	2	2	2
5112059003		female	1	1	1	1	0	1	1	0	0	2	6	1	1	1	1	0	1	1	6	2	2	2	2	1	2	3	1	2	3
5112059004		female	1	0	0	1	0	1	1	0	0	1	4	1	0	0	0	0	0	0	1	1	1	1	3	3	2	3	3	0	1
5112059005		female	2	1	0	1	2	1	1	1	0	2	9	1	1	1	1	1	1	0	6	4	2	2	2	1	2	2	2	2	1
5112059007		female	0	0	0	1	1	0	0	0	0	1	2	1	1	0	0	0	1	0	3	2	1	2	3	2	2	2	2	2	1
5112059008		female	1	1	0	1	1	1	1	0	0	1	6	1	1	1	1	0	1	0	5	1	1	1	3	3	3	3	3	1	1
5112059009		female	1	1	2	1	0	0	0	0	0	1	5	1	0	0	0	0	0	0	1	1	1	1	3	3	1	4	3	1	1
5112059010		female	1	0	0	1	1	0	0	0	0	2	3	0	0	1	1	0	0	0	2	1	1	1	3	3	1	3	3	1	1
5112059011		female	1	1	0	0	0	1	1	1	0	1	5	0	0	0	0	0	0	0	0	1	1	1	3	3	1	4	3	2	1
5112059013		female	1	1	0	1	1	0	0	1	0	1	5	1	1	1	0	1	1	0	5	2	2	2	2	2	1	3	2	2	2
5112029013		male	0	1	1	1	1	1	0	0	0	1	5	1	1	0	1	0	0	0	3	0	1	2	3	3	0	4	2	0	0
5112029016		male	1	0	0	0	1	0	0	0	0	1	2	0	0	0	0	0	0	0	0	1	1	0	3	4	2	4	4	0	0
5112029017		male	1	1	0	1	1	1	1	3	0	1	9	1	1	1	1	1	1	1	7	0	0	0	4	4	4	4	4	0	0
5112029018		male	1	1	0	0	0	0	1	0	0	1	3	0	0	1	0	0	0	0	1	1	2	2	2	2	2	4	2	1	2
5112039035		male	1	1	1	1	0	0	0	0	0	1	4	0	0	0	0	0	0	0	0	1	1	1	4	2	2	2	2	2	2
5112049011		male	1	1	0	1	1	1	0	1	0	1	6	0	0	0	0	0	0	0	0	0	0	2	3	3	0	4	3	1	1
5112049013		male	1	1	1	1	1	1	1	1	1	1	9	1	0	1	0	1	0	0	3	1	1	2	3	2	1	3	3	2	1
5112059019		male	1	1	0	1	1	1	0	1	0	1	6	1	1	1	1	0	1	0	5	2	1	2	4	3	0	1	4	0	1
5112019028		male	1	1	0	1	0	0	0	0	0	2	3	0	0	0	0	0	1	0	1	1	1	1	3	2	1	2	3	2	1
5112019029		male	1	1	0	1	1	1	0	0	0	2	5	1	0	1	0	0	0	0	2	2	2	2	3	3	2	3	3	1	1
5112029015		male	1	0	0	1	0	0	0	0	0	1	2	0	0	0	0	0	0	0	0	1	2	1	3	3	0	4	2	1	3
5112049014		male	0	0	0	0	0	0	0	0	0	0	0	0	0	0	0	0	0	0	0	0	0	0	0	0	0	0	0	0	0
5112049015		male	1	1	1	1	1	1	1	0	0	1	7	1	0	0	0	0	0	0	1	1	0	2	3	2	1	4	3	2	0
5112049016		male	1	1	0	1	1	0	0	0	0	2	4	1	0	1	0	0	0	0	2	2	2	2	3	3	3	3	3	1	0
5112049018		male	1	1	1	1	1	1	1	0	0	2	7	1	1	0	0	0	1	0	3	2	2	2	1	2	2	2	2	2	2
5111919002		female	1	1	0	0	1	1	1	0	0	2	5	1	1	1	1	0	1	1	6	2	3	3	3	2	1	4	3	3	2
5111919004		female	1	1	1	1	0	0	0	0	0	1	4	1	0	0	0	0	0	0	1	1	1	1	4	4	1	4	4	1	1
5111919006		female	1	0	1	1	1	0	1	0	0	1	5	1	0	1	1	0	1	0	4	1	1	2	3	2	1	3	3	2	2
5111919007		female	0	0	0	0	1	0	0	1	0	1	2	0	0	0	0	0	0	0	0	1	0	0	3	3	1	3	3	2	1
5111919008		female	1	1	1	0	1	1	0	0	0	2	5	1	1	1	1	0	1	0	5	3	3	3	3	3	3	3	3	3	3
5111919009		female	2	2	3	1	3	1	3	1	0	2	16	2	1	0	0	0	0	0	3	3	3	3	3	2	2	2	2	3	2
5111919011		female	2	2	1	2	0	0	0	1	0	2	8	2	1	3	1	0	3	2	12	2	3	3	1	1	2	3	1	2	3
5111919012		female	1	1	0	1	1	1	2	0	0	2	7	1	1	1	1	0	1	0	5	2	2	2	2	2	2	1	2	2	2
5111919013		female	0	0	0	1	0	0	1	0	0	1	2	0	1	0	0	0	0	0	1	1	1	2	3	3	1	4	3	1	0
5111919014		female	1	0	1	0	0	1	1	0	0	1	4	1	0	1	1	0	1	0	4	1	1	2	2	2	2	3	3	2	2
5111919027		female	0	0	0	0	0	0	0	0	0	0	0	0	0	0	0	0	0	0	0	1	1	1	4	4	1	3	4	1	1
5111919028		female	1	1	0	1	0	0	1	0	0	2	4	1	0	1	0	0	0	0	2	2	1	2	2	2	1	3	3	1	1
5111919029		female	1	1	0	1	0	0	0	0	0	1	3	1	0	1	0	0	0	0	2	1	1	2	3	3	1	4	3	1	1
5111919030		female	2	3	3	3	3	3	3	1	1	2	22	3	3	3	3	1	2	2	17	3	3	3	1	1	4	1	1	3	3
5111919031		female	0	0	0	1	1	1	0	0	0	2	3	0	0	0	3	0	0	0	3	1	2	2	3	2	1	3	2	1	2
5111919032		female	1	1	2	1	1	1	2	1	0	2	10	0	1	1	1	0	1	0	4	2	3	2	2	2	2	1	3	3	3
5111919033		female	0	0	0	0	0	0	0	0	0	0	0	0	0	0	0	0	0	0	0	3	1	2	4	4	2	4	4	1	1
5111919034		female	0	1	0	1	1	1	0	0	0	1	4	0	0	1	0	0	1	0	2	1	1	2	3	3	1	3	3	2	2
5111919035		female	1	1	1	3	2	1	1	0	0	2	10	1	1	2	1	0	0	0	5	3	2	2	4	2	1	4	3	1	1
5111919036		female	0	0	0	0	0	0	0	0	0	0	0	0	1	1	0	0	0	0	2	1	2	2	3	3	1	1	3	1	1
5111919037		female	0	0	0	0	1	0	0	0	0	1	1	0	0	0	0	0	0	0	0	1	1	0	3	3	1	3	3	1	0
5111919038		female	0	0	0	0	0	0	0	0	0	0	0	0	0	0	0	0	0	0	0	0	0	0	4	4	0	4	4	0	0
5111919039		female	1	0	0	0	0	0	1	0	0	1	2	0	0	0	0	0	0	0	0	0	1	1	2	3	1	2	2	2	1
5111919001		female	0	0	0	0	0	0	0	0	0	0	0	0	0	0	0	0	0	0	0	1	1	1	4	3	0	1	3	1	0
5111919003		female	0	0	0	0	0	0	0	0	0	0	0	0	0	0	0	0	0	0	0	2	1	1	3	3	1	3	3	1	1
5111919005		female	0	0	0	0	0	0	0	0	0	0	0	0	0	0	0	0	0	0	0	0	0	0	4	4	0	4	4	0	0
5111919010		female	3	3	1	2	3	1	3	0	0	2	16	1	2	2	2	1	2	0	10	1	2	2	1	1	2	3	2	2	3
5111919019		male	0	1	1	1	0	1	1	0	0	2	5	0	0	0	0	0	0	0	0	2	2	1	2	2	1	3	3	1	1
5111919020		male	0	0	0	0	0	0	0	0	0	0	0	0	0	1	0	0	0	0	1	2	2	2	3	3	1	3	3	1	1
5111919021		male	0	0	0	1	0	0	0	0	0	2	1	0	0	0	0	0	0	0	0	1	2	2	3	2	1	4	3	1	1
5111919044		male	1	1	1	1	1	1	1	0	0	2	7	0	0	1	0	1	1	0	3	1	1	2	3	2	1	4	2	2	2
5111919045		male	0	0	0	1	0	0	0	0	0	1	1	0	0	1	0	0	1	0	2	2	1	1	3	3	1	3	3	1	1
5111919046		male	0	0	0	0	0	0	0	0	0	0	0	0	0	0	0	0	0	0	0	1	1	0	3	3	1	3	3	0	1
5111919047		male	0	0	0	1	0	0	1	0	0	1	2	0	0	0	0	0	1	0	1	0	0	1	4	3	1	3	3	1	1
5111919017		male	1	1	1	1	1	0	0	0	0	1	5	0	0	0	0	0	0	0	0	1	1	1	3	3	1	3	3	2	1
5111919043		male	1	1	0	1	0	0	0	0	0	1	3	0	1	1	1	0	0	1	4	2	2	2	2	2	2	2	2	2	2
5111109001		female	1	1	1	1	1	1	0	0	0	2	6	1	1	2	1	1	1	1	8	2	3	3	2	2	2	4	2	2	2
5111109002		female	1	1	0	1	0	0	1	1	0	1	5	1	0	0	1	1	1	0	4	2	3	1	4	3	1	3	4	1	2
5111109003		female	1	1	0	0	0	0	1	1	0	1	4	1	0	1	1	0	1	0	4	2	1	1	3	3	1	2	3	2	2
5111109029		female	1	1	1	1	1	0	1	0	0	1	6	1	1	1	1	0	0	1	5	2	2	2	3	2	1	3	3	3	1
5111109030		female	1	1	1	1	1	1	1	0	0	2	7	1	0	0	1	1	1	0	4	2	2	2	2	2	1	3	2	1	1
5111109056		female	1	1	3	3	3	1	1	1	0	3	14	1	1	1	1	0	1	0	5	2	1	2	3	1	1	4	4	1	1
5111109058		female	1	1	1	0	3	2	0	1	0	1	9	0	0	1	0	0	0	0	1	2	0	1	3	3	1	2	2	1	2
5111109006		male	0	0	1	1	0	0	0	1	0	1	3	1	1	0	0	0	0	1	3	1	1	1	2	3	1	3	2	1	1
5111109007		male	1	1	0	1	2	1	0	0	0	1	6	1	1	1	2	0	1	0	6	1	1	1	3	3	1	3	3	1	1
5111109009		male	0	0	0	1	1	0	1	0	0	1	3	1	0	0	0	0	1	0	2	2	2	2	3	3	1	4	4	2	3
5111109010		male	1	1	0	1	0	0	1	0	0	1	4	1	1	1	1	1	1	1	7	1	1	2	3	3	2	4	3	2	2
5111109012		male	1	1	0	1	1	0	1	0	0	1	5	1	0	0	1	0	0	0	2	1	0	2	3	3	2	4	3	2	1
5111109014		male	1	0	1	1	0	0	1	0	0	1	4	1	0	1	0	0	1	0	3	1	1	1	3	3	2	1	3	1	1
5111109017		male	1	1	0	1	1	0	0	0	0	1	4	0	0	0	0	0	0	0	0	1	1	1	3	3	1	3	3	1	1
5111109018		male	1	1	1	1	1	1	1	1	0	2	8	1	1	1	1	1	1	1	7	1	2	2	2	2	2	3	3	1	2
5111109022		male	1	0	0	1	1	0	0	0	0	1	3	0	0	0	0	0	0	0	0	1	0	1	3	2	1	3	3	2	0
5111109023		male	0	1	0	1	0	0	0	0	0	1	2	0	1	0	0	0	0	0	1	2	3	1	4	4	1	4	4	1	2
5111109024		male	1	0	0	0	0	0	0	0	0	1	1	1	0	0	0	0	0	0	1	1	1	1	3	3	2	4	3	1	1
5111109025		male	2	3	0	2	2	1	0	1	2	2	13	1	0	0	0	0	1	0	2	3	3	1	3	2	1	3	2	1	2
5111109026		male	0	1	3	2	0	0	1	0	0	1	7	2	1	0	1	0	1	0	5	1	2	2	3	2	3	1	3	1	2
5111109033		male	0	0	0	0	0	0	0	0	0	0	0	0	0	0	0	0	0	0	0	1	0	0	4	3	0	3	3	1	0
5111109034		male	1	1	0	1	1	0	0	0	0	1	4	1	1	0	1	0	0	1	4	1	1	2	2	2	1	3	3	2	1
5111109035		male	0	0	0	1	0	1	0	0	0	1	2	1	1	1	2	0	0	0	5	2	1	2	4	4	0	4	4	2	1
5111109036		male	0	1	0	1	0	0	0	0	0	1	2	0	0	0	0	0	0	0	0	0	0	3	4	4	0	4	2	2	0
5111109037		male	1	0	0	1	0	0	0	0	0	1	2	0	0	0	1	0	0	0	1	1	1	2	4	3	1	3	3	2	1
5111109038		male	0	0	1	1	0	0	0	0	0	1	2	0	0	0	0	0	0	0	0	1	1	1	3	3	0	3	4	2	1
5111109039		male	2	2	2	2	0	2	2	2	0	3	14	2	0	2	2	2	2	0	10	4	4	4	2	2	2	4	2	4	4
5111109040		male	0	1	0	1	0	0	0	0	0	1	2	1	0	0	0	0	0	0	1	2	2	2	2	2	2	3	3	1	2
5111109042		male	1	1	0	1	0	1	1	0	0	2	5	1	0	1	1	1	1	0	5	2	1	2	3	3	2	4	3	1	1
5111109043		male	1	1	0	2	0	1	0	0	0	2	5	1	0	1	1	0	1	0	4	1	2	3	2	2	2	3	3	1	2
5111109044		male	1	1	1	1	0	1	2	1	0	1	8	2	2	3	1	1	1	0	10	2	2	2	3	1	2	4	3	2	2
5111109045		male	0	0	2	1	0	0	0	0	0	2	3	0	0	0	1	0	0	0	1	2	1	1	3	3	0	4	3	0	1
5111109046		male	1	0	1	1	0	0	0	0	0	2	3	0	1	1	0	0	0	0	2	1	1	1	3	3	1	3	3	1	1
5111109048		male	1	1	1	1	1	0	1	0	0	1	6	1	0	0	0	0	1	0	2	1	1	1	3	3	1	4	4	1	1
5111109049		male	1	1	1	1	0	1	0	0	0	2	5	1	1	1	1	1	1	0	6	2	2	2	2	2	2	2	2	2	1
5111109050		male	1	0	1	1	0	0	0	0	0	1	3	1	0	0	0	0	1	0	2	1	1	2	2	3	1	4	2	1	1
5111109051		male	1	0	1	1	0	0	0	0	0	1	3	1	0	0	1	0	0	0	2	1	2	1	3	2	1	3	3	1	1
5111109053		male	1	0	1	1	0	0	1	0	0	2	4	1	0	1	1	0	0	0	3	0	1	2	3	2	1	3	3	2	3
5111109060		male	1	0	0	0	0	0	2	0	0	1	3	0	0	0	0	0	0	0	0	1	1	1	2	2	2	4	4	3	2
5111109062		male	2	1	0	1	2	1	0	0	0	2	7	1	1	1	1	0	1	0	5	2	1	1	3	2	1	2	3	2	2
5111109063		male	1	1	0	1	1	0	1	0	0	2	5	0	0	1	0	0	1	0	2	1	1	1	3	2	1	1	3	3	1
5111109064		male	1	1	0	1	1	1	0	0	0	1	5	1	0	0	1	1	1	0	4	2	2	1	3	3	1	4	3	1	2
5111109065		male	0	0	0	3	0	3	0	0	0	1	6	3	0	0	0	0	0	0	3	3	2	1	3	3	4	3	4	1	1
5111109066		male	1	1	1	1	1	2	0	0	0	1	7	1	1	0	0	0	1	0	3	2	2	1	4	3	1	4	3	2	1
5111109067		male	1	1	1	1	1	1	1	1	0	1	8	1	1	1	1	1	1	0	6	2	2	2	2	2	1	1	2	2	2
5111109068		male	1	1	0	1	1	1	1	0	0	1	6	0	1	1	1	0	0	0	3	1	2	2	3	3	1	3	3	1	2
5111109069		male	1	1	1	1	1	2	0	1	0	2	8	1	2	3	1	0	0	0	7	0	4	4	4	3	4	4	2	1	2
5111109070		male	1	2	0	1	0	0	0	1	0	2	5	1	1	1	2	0	2	0	7	2	0	2	4	4	2	4	4	1	1
5111109071		male	0	0	0	0	1	0	0	0	0	2	1	1	0	0	0	0	0	0	1	2	1	2	4	3	1	3	4	2	1
5111109072		male	0	0	0	1	0	0	0	0	0	1	1	0	0	0	0	0	0	0	0	0	2	0	4	3	1	4	3	1	0
5111109073		male	0	1	0	1	1	0	0	0	0	1	3	1	1	1	0	0	0	0	3	1	2	2	3	3	1	3	2	0	2
5111109074		male	1	1	1	1	0	0	1	0	0	2	5	1	1	1	0	0	0	0	3	1	1	2	3	2	2	3	3	1	2
5111109075		male	1	0	0	1	1	1	1	0	0	1	5	0	0	1	0	1	0	0	2	2	2	2	2	2	2	2	2	2	2
5111109076		male	0	1	1	2	1	1	2	0	0	2	8	1	0	1	0	0	1	1	4	1	1	2	3	2	3	4	3	1	1
5111109077		male	1	1	0	1	1	1	1	0	0	1	6	0	0	1	0	0	0	0	1	2	2	2	2	2	2	2	2	2	2
5111109078		male	0	0	0	0	0	0	0	0	0	0	0	1	0	1	0	0	0	0	2	1	1	1	3	3	1	4	2	0	2
5111109080		male	1	1	0	0	0	1	0	0	0	1	3	1	0	0	1	0	1	0	3	1	1	1	1	3	1	1	3	1	1
5110309091		female	1	1	1	1	1	0	0	0	0	1	5	0	0	0	0	0	0	0	0	2	1	1	3	3	1	3	3	1	2
5110309093		female	1	1	0	0	1	0	0	0	0	1	3	0	0	0	0	0	0	0	0	2	2	2	3	3	1	4	3	1	0
5110309095		female	1	0	0	1	0	1	0	0	0	1	3	0	1	1	0	0	0	0	2	1	2	3	3	2	2	4	4	1	1
5110309102		female	1	0	0	1	0	0	1	0	0	1	3	0	0	1	0	0	0	0	1	1	1	2	3	4	1	0	4	0	0
5110309103		female	0	1	1	0	0	0	0	0	0	1	2	1	1	1	1	0	1	0	5	2	1	2	2	2	1	3	3	2	1
5110309104		female	0	1	0	1	0	0	0	0	0	2	2	1	0	1	1	0	1	0	4	1	1	2	3	2	2	3	3	1	1
5110309105		female	0	1	1	1	0	1	1	0	0	2	5	1	1	0	2	1	1	0	6	1	2	2	2	2	2	3	3	1	2
5110309129		female	0	0	0	0	1	0	1	0	0	1	2	0	0	0	0	0	0	0	0	1	0	1	4	4	1	4	4	1	1
5110309130		female	0	1	1	1	0	1	0	0	0	1	4	0	0	0	0	0	0	1	1	2	2	2	3	2	1	3	3	1	1
5110309131		female	1	1	1	1	2	1	1	1	0	2	9	2	3	2	1	2	1	0	11	2	3	4	1	2	2	1	3	4	3
5110309132		female	0	1	0	1	0	1	0	0	0	1	3	1	0	0	0	0	1	0	2	2	3	2	4	3	1	4	4	1	2
5110309133		female	1	1	1	1	1	1	1	1	0	2	8	1	0	1	1	0	1	0	4	2	2	2	2	2	2	3	3	2	2
5110309155		female	1	1	1	2	3	1	0	0	0	2	9	1	0	0	2	1	0	0	4	2	3	2	3	3	2	3	3	1	3
5110309157		female	1	1	0	1	0	0	0	0	0	2	3	1	1	1	1	0	1	0	5	2	1	1	2	2	1	3	2	1	1
5110309158		female	1	1	0	1	0	1	0	0	0	1	4	1	1	1	1	0	0	0	4	3	3	3	2	2	1	4	3	1	2
5110309159		female	0	1	0	1	0	0	1	0	0	1	3	1	1	2	1	0	1	0	6	3	1	3	2	2	1	2	3	3	3
5110309181		female	0	0	0	0	0	0	0	0	0	0	0	0	0	0	0	0	0	0	0	0	0	0	4	4	0	4	4	0	0
5110309182		female	0	0	1	1	0	1	0	0	0	1	3	1	0	0	0	0	0	0	1	2	1	1	3	2	1	3	4	1	1
5110309183		female	0	0	0	0	0	0	0	0	0	0	0	1	0	0	0	0	0	0	1	0	0	1	4	4	0	4	4	1	1
5110309184		female	1	1	0	1	1	1	0	0	0	1	5	1	1	0	1	0	1	0	4	2	2	2	2	2	1	3	2	2	2
5110309185		female	1	3	1	2	2	3	3	2	1	2	18	2	2	2	2	2	1	2	13	2	2	2	2	2	2	2	2	2	2
5110309186		female	0	2	0	1	1	1	0	0	0	1	5	2	2	2	2	0	1	0	9	3	2	3	2	0	2	4	3	0	1
5110309207		female	0	1	0	0	1	0	0	0	0	1	2	1	1	0	0	0	0	0	2	2	1	2	3	3	2	3	3	1	1
5110309208		female	0	0	0	0	0	0	0	0	0	0	0	0	0	0	0	0	0	0	0	1	1	1	3	3	2	3	3	1	1
5110309209		female	1	1	0	1	0	1	0	0	0	2	4	1	1	1	1	1	1	0	6	2	2	1	2	3	1	3	2	0	1
5110309210		female	1	1	1	1	1	1	1	1	0	2	8	1	1	1	1	1	1	1	7	3	2	2	2	1	1	3	2	2	2
5110309211		female	1	1	1	1	0	1	0	0	0	2	5	1	1	0	0	0	1	1	4	2	2	2	1	1	2	3	1	2	2
5110309213		female	0	0	0	0	1	0	1	0	0	2	2	1	0	0	0	0	0	0	1	2	2	2	2	2	2	4	2	1	1
5110309214		female	1	0	0	1	0	0	0	0	0	1	2	1	0	1	1	0	0	0	3	3	3	3	4	4	3	4	3	1	1
5110309234		female	1	1	0	1	1	2	2	0	1	2	9	1	1	1	3	1	1	2	10	2	2	2	1	2	2	3	2	1	2
5110309235		female	0	0	1	1	0	0	1	0	0	1	3	1	1	1	1	1	1	1	7	2	1	2	3	3	1	3	3	3	1
5110309236		female	0	0	0	1	0	0	0	0	0	2	1	0	0	0	0	0	0	0	0	2	2	1	3	2	1	4	3	1	1
5110309237		female	1	0	0	1	1	0	0	0	0	1	3	1	0	0	1	0	0	0	2	1	2	1	3	2	1	3	3	1	1
5110309238		female	1	0	0	0	1	0	0	0	0	1	2	1	0	0	1	0	0	0	2	1	1	1	3	3	1	3	3	1	2
5110309257		female	1	1	0	1	0	0	1	0	0	1	4	1	1	0	1	1	0	0	4	2	2	2	3	3	2	2	2	2	2
5110309260		female	0	0	0	0	0	0	0	0	0	0	0	0	0	0	0	0	0	0	0	2	1	1	3	2	2	3	3	1	1
5110309262		female	0	1	0	1	0	0	0	0	0	1	2	1	0	0	0	0	0	0	1	1	1	1	3	3	1	3	3	1	1
5110309284		female	1	1	1	2	1	1	1	0	0	2	8	1	1	1	0	0	0	0	3	2	2	2	2	2	1	3	2	2	2
5110309285		female	0	0	0	1	1	0	0	0	0	1	2	0	0	1	1	0	0	0	2	2	1	2	4	4	1	3	3	2	1
5110309286		female	1	0	0	0	1	1	0	1	0	2	4	1	0	0	0	0	0	0	1	2	2	2	3	3	1	4	3	1	1
5110309287		female	2	0	1	2	2	0	0	0	0	1	7	0	0	0	0	0	0	0	0	1	1	0	3	3	0	4	3	0	1
5110309288		female	1	1	1	1	1	1	0	0	0	2	6	1	0	1	0	0	0	0	2	1	1	1	1	1	1	1	1	1	1
5110309311		female	1	1	0	1	0	0	0	0	0	1	3	1	0	0	1	0	0	0	2	2	1	2	4	3	2	3	3	1	2
5110309312		female	1	1	2	1	0	0	1	0	1	2	7	1	1	1	0	0	1	1	5	2	3	2	3	3	1	2	3	2	1
5110309313		female	0	0	0	1	0	0	0	0	0	2	1	0	0	0	0	0	0	0	0	1	1	1	3	3	2	3	3	2	2
5110309314		female	2	1	1	1	0	1	2	0	0	2	8	1	0	1	2	2	2	0	8	2	2	3	3	3	1	3	3	2	2
5110309315		female	1	1	0	1	0	0	1	0	0	1	4	1	0	0	3	1	0	0	5	2	1	3	4	3	1	4	3	2	2
5110309336		female	0	1	0	1	1	0	0	0	0	2	3	1	1	1	0	0	0	0	3	1	2	3	4	4	2	4	3	2	1
5110309337		female	1	1	1	1	1	1	2	1	0	1	9	1	0	1	2	2	1	0	7	2	2	2	2	3	2	2	2	2	1
5110309339		female	0	1	0	1	0	1	0	0	0	1	3	1	0	0	0	0	0	1	2	2	1	1	4	3	2	3	3	1	1
5110309340		female	0	0	1	1	1	0	0	0	0	1	3	1	0	0	1	0	1	0	3	1	1	2	3	3	1	3	3	1	1
5110309362		female	0	1	0	1	0	1	0	0	0	2	3	0	0	0	0	0	0	0	0	1	1	2	3	2	2	3	3	2	2
5110309363		female	1	1	0	1	3	0	0	0	0	1	6	0	0	1	1	0	1	0	3	2	1	1	2	1	1	4	2	2	2
5110309364		female	1	1	0	2	2	2	0	0	0	2	8	1	1	1	1	0	1	1	6	2	2	3	2	2	3	1	1	1	2
5110309365		female	0	0	0	1	0	0	1	0	0	1	2	0	0	0	0	0	0	0	0	0	0	1	3	4	0	4	4	0	1
5110309413		female	1	1	0	0	0	1	0	0	0	1	3	1	0	0	1	0	0	0	2	2	1	2	4	3	1	4	4	1	2
5110309414		female	1	1	1	1	1	0	1	1	0	1	7	1	0	1	1	1	1	0	5	2	1	1	3	3	2	3	3	2	2
5110309440		female	0	1	1	1	1	0	1	0	0	2	5	1	0	0	0	0	0	0	1	2	1	2	3	3	1	4	3	2	1
5110309441		female	0	0	0	0	0	0	0	0	0	0	0	0	0	0	0	0	0	0	0	2	2	2	2	2	2	2	2	2	2
5110309442		female	1	0	0	0	0	1	0	0	0	2	2	0	0	0	0	0	0	0	0	1	1	1	3	3	2	3	3	1	2
5110309443		female	0	0	0	0	0	0	0	0	0	0	0	0	0	0	0	0	0	0	0	2	1	1	4	4	1	4	4	1	1
5110309490		female	1	1	0	1	0	1	0	0	0	2	4	1	0	1	0	0	0	0	2	0	0	1	3	3	1	3	3	1	2
5110309491		female	0	0	0	1	0	0	0	0	0	1	1	0	0	0	0	0	0	0	0	0	0	0	3	3	0	2	3	0	0
5110309492		female	1	1	1	1	1	2	1	1	0	1	9	2	1	1	1	1	1	1	8	3	3	3	2	2	2	2	2	2	2
5110309493		female	2	2	0	1	3	1	2	2	1	2	14	1	1	1	1	1	1	1	7	1	1	1	1	1	1	1	1	1	1
5110309514		female	1	1	0	1	1	2	1	1	0	1	8	2	1	1	2	0	1	0	7	2	2	2	3	1	1	3	3	3	1
5110309515		female	1	0	1	1	2	0	0	0	0	1	5	1	1	1	1	1	0	0	5	2	2	1	2	3	1	2	3	2	2
5110309540		female	1	1	0	1	1	0	0	0	0	1	4	0	0	0	0	0	0	0	0	1	1	1	3	3	1	3	3	1	1
5110309543		female	0	0	0	0	0	0	0	0	0	0	0	1	1	0	0	0	0	0	2	1	0	1	4	4	0	4	4	0	1
5110309591		female	1	0	0	1	1	0	1	0	0	1	4	1	0	1	0	0	0	0	2	2	1	1	0	3	1	3	3	1	1
5110309592		female	1	1	1	1	1	0	0	0	0	1	5	1	1	0	0	0	0	0	2	2	2	2	1	2	3	3	2	1	2
5110309593		female	1	1	0	0	1	1	1	0	0	2	5	0	0	0	0	0	0	0	0	0	2	2	3	3	2	1	3	2	2
5110309594		female	0	0	0	0	0	0	0	0	0	0	0	0	0	0	1	0	0	0	1	1	0	2	3	3	1	3	3	1	0
5110309619		female	0	1	0	0	0	0	0	0	0	1	1	0	0	0	0	0	0	0	0	2	1	2	4	3	1	3	3	1	1
5110309620		female	1	1	2	1	0	1	0	0	0	2	6	1	1	0	0	0	1	0	3	2	2	1	2	2	2	3	3	1	1
5110309644		female	1	0	0	1	0	0	0	0	0	1	2	0	0	0	0	0	0	0	0	1	1	2	3	2	1	3	3	2	1
5110309645		female	0	0	1	1	0	0	1	1	0	1	4	1	1	1	2	0	0	0	5	2	2	2	3	3	1	3	3	1	1
5110309646		female	0	0	0	1	0	0	1	1	0	1	3	0	0	0	0	0	0	0	0	3	3	2	3	3	3	2	2	1	3
5110309647		female	1	1	0	2	0	1	0	0	0	1	5	1	0	1	0	0	0	0	2	1	1	2	2	2	1	4	2	0	2
5110309648		female	1	1	0	1	0	1	1	1	0	2	6	1	1	1	1	1	1	0	6	2	2	2	3	3	1	1	3	1	1
5110309669		female	1	0	0	1	0	0	0	0	0	1	2	0	0	0	1	0	1	0	2	1	0	1	3	3	1	3	3	1	0
5110309672		female	1	1	3	3	2	2	1	0	0	2	13	1	1	2	2	0	1	0	7	3	1	3	2	1	2	2	2	2	2
5110309695		female	0	1	0	1	1	0	1	1	0	2	5	2	1	2	2	1	2	0	10	1	2	2	3	3	1	3	3	2	1
5110309696		female	1	1	2	1	0	0	0	1	0	1	6	1	1	1	0	1	1	2	7	2	3	2	1	2	2	3	2	2	2
5110309697		female	1	1	1	1	1	0	0	0	1	1	6	0	0	1	0	0	0	0	1	2	0	1	4	4	1	2	3	3	1
5110309698		female	1	1	1	1	1	1	1	2	0	2	9	1	0	1	0	1	0	0	3	2	2	2	2	2	2	1	2	1	2
5110309718		female	0	0	0	0	1	0	0	0	0	1	1	1	0	0	1	0	0	0	2	1	2	1	3	2	1	4	3	1	1
5110309719		female	0	1	1	1	1	0	1	0	0	2	5	1	0	0	1	0	0	0	2	1	1	1	3	3	1	3	3	1	1
5110309721		female	0	0	0	0	0	0	0	0	0	0	0	0	0	0	0	0	0	0	0	1	1	1	2	4	2	2	2	2	2
5110309722		female	2	1	0	1	1	2	1	0	0	2	8	1	1	1	1	0	1	0	5	1	3	3	1	1	3	1	1	2	3
5110309723		female	0	0	1	0	1	0	2	0	0	1	4	0	1	0	0	0	1	0	2	2	1	1	3	3	1	4	4	1	1
5110309724		female	1	1	0	0	1	1	0	0	0	1	4	1	0	1	0	0	1	0	3	2	2	2	3	2	1	4	4	0	1
5110309725		female	1	1	1	1	0	1	1	0	0	2	6	1	1	1	1	0	0	0	4	2	2	2	2	2	1	4	2	2	2
5110309726		female	1	1	0	1	1	1	0	0	0	2	5	1	0	0	0	1	0	0	2	0	0	1	3	3	1	3	3	1	1
5110309735		female	0	1	0	0	0	1	0	0	0	1	2	1	0	0	0	0	0	0	1	1	1	2	3	3	1	2	3	2	1
5110309736		female	1	1	1	1	0	1	1	1	0	2	7	1	0	1	1	1	1	1	6	2	2	3	2	1	3	3	2	1	2
5110309739		female	0	0	0	0	0	1	1	0	0	1	2	1	1	0	0	0	0	0	2	2	2	2	2	2	2	4	2	2	2
5110309756		female	1	1	0	0	0	0	0	0	0	1	2	1	1	1	0	0	0	0	3	2	1	3	4	3	1	4	4	2	3
5110309758		female	1	0	0	1	0	0	0	0	0	1	2	1	0	0	0	0	0	0	1	1	0	1	4	3	0	4	4	0	1
5110309759		female	1	1	1	1	1	1	0	0	0	1	6	1	0	1	0	0	1	0	3	2	2	3	2	2	1	3	2	1	1
5110309760		female	0	0	0	0	0	1	1	0	0	2	2	0	1	1	1	1	0	1	5	2	2	2	3	3	2	3	3	3	2
5110309778		female	0	0	0	0	0	0	0	0	0	0	0	0	0	0	0	0	0	0	0	2	2	2	2	3	1	3	2	1	2
5110309779		female	1	0	0	0	0	0	0	0	0	2	1	0	1	1	0	0	0	0	2	1	1	2	3	2	1	3	3	1	3
5110309780		female	0	1	1	1	2	1	0	0	0	2	6	1	1	2	2	0	1	0	7	2	2	3	3	3	2	4	2	1	2
5110309798		female	1	1	1	1	1	1	0	0	0	1	6	1	0	1	0	0	1	0	3	1	0	1	3	2	0	4	3	1	1
5110309799		female	0	1	0	1	0	1	0	0	0	2	3	1	1	0	0	0	0	0	2	1	2	2	2	2	1	3	3	2	2
5110309800		female	2	2	0	1	0	2	1	0	0	2	8	2	2	2	2	0	2	2	12	2	2	2	1	1	2	3	2	2	3
5110309101		female	2	2	1	2	3	3	3	0	1	2	17	3	3	3	3	1	3	0	16	2	3	4	2	1	2	3	1	2	3
5110309128		female	1	1	1	2	1	2	2	0	0	2	10	2	2	3	1	0	1	0	9	3	4	3	2	2	2	4	2	3	3
5110309160		female	1	1	0	1	0	1	0	0	0	1	4	1	1	1	0	0	0	0	3	1	3	3	3	2	2	4	3	1	3
5110309338		female	0	1	1	1	1	1	1	0	0	2	6	0	0	0	0	0	0	0	0	2	1	1	3	3	2	1	3	2	2
5110309366		female	3	3	0	3	0	0	0	0	0	2	9	0	0	1	3	0	0	0	4	4	4	4	4	1	3	3	3	1	3
5110309367		female	1	1	1	2	0	0	1	0	0	1	6	1	0	0	1	0	1	0	3	3	2	1	2	1	2	3	2	2	2
5110309388		female	1	1	1	1	0	1	1	0	1	2	7	1	1	1	1	1	1	1	7	3	2	2	3	1	2	3	3	2	2
5110309389		female	1	1	1	1	1	0	1	0	0	1	6	1	0	0	1	0	1	0	3	1	1	1	3	2	1	4	3	2	2
5110309699		female	1	0	0	0	1	0	1	0	0	1	3	1	0	1	1	0	0	0	3	1	2	2	3	3	1	4	3	2	1
5110309717		female	0	1	1	0	2	0	1	0	0	1	5	0	0	0	0	0	0	0	0	1	1	1	3	3	1	3	3	2	1
5110309720		female	0	0	0	0	0	0	0	0	0	0	0	0	0	0	0	0	0	0	0	0	0	0	4	4	0	4	4	0	0
5110309738		female	1	1	1	2	2	1	1	2	0	2	11	2	1	1	2	1	0	0	7	2	2	2	3	3	2	4	2	1	3
5110309001		male	1	1	0	1	1	0	3	1	1	1	9	0	0	0	0	3	0	0	3	2	1	2	1	2	2	3	1	2	2
5110309002		male	1	1	0	1	0	1	0	0	0	1	4	1	1	0	0	0	1	0	3	1	3	2	4	3	1	3	2	2	2
5110309008		male	1	1	0	1	0	1	1	0	0	2	5	0	0	1	0	0	0	0	1	1	1	1	3	3	1	4	4	1	1
5110309012		male	0	0	0	0	0	0	0	0	0	0	0	0	0	1	0	0	0	1	2	1	2	2	3	2	1	3	3	1	2
5110309014		male	0	1	0	1	0	0	0	0	0	2	2	1	0	2	0	0	1	0	4	2	3	3	3	2	1	4	3	1	4
5110309017		male	2	0	1	2	1	1	1	0	0	2	8	0	0	0	0	1	0	0	1	0	1	2	2	1	1	3	2	1	3
5110309020		male	1	1	1	1	1	1	1	0	0	1	7	1	0	1	0	0	1	0	3	1	1	1	1	1	1	1	1	1	1
5110309027		male	0	0	0	0	0	0	0	0	0	0	0	0	0	0	0	0	0	0	0	1	1	1	3	3	1	3	3	3	1
5110309029		male	1	1	0	1	0	0	3	0	0	1	6	1	0	1	0	1	0	0	3	1	1	3	4	4	1	4	4	1	2
5110309038		male	1	1	1	1	1	1	0	0	0	1	6	1	0	1	0	0	0	0	2	1	1	1	4	4	1	4	4	1	1
5110309039		male	0	1	0	1	0	0	0	0	0	1	2	1	0	0	0	0	0	0	1	1	1	1	4	3	1	4	4	1	1
5110309042		male	1	1	1	1	1	0	0	0	0	1	5	1	0	1	0	0	1	0	3	2	1	2	2	2	1	3	2	1	1
5110309043		male	1	1	1	1	1	1	1	1	0	1	8	1	1	1	1	1	1	1	7	2	2	2	2	2	2	2	2	2	2
5110309044		male	1	1	0	1	1	0	1	0	0	2	5	0	0	1	0	0	0	1	2	3	3	2	3	2	1	3	2	1	2
5110309046		male	1	1	1	1	1	1	1	0	0	1	7	1	1	1	1	0	0	0	4	2	2	2	3	3	3	4	3	3	1
5110309052		male	0	0	0	0	0	0	0	0	0	0	0	0	0	0	0	0	0	0	0	0	0	0	4	4	0	4	4	2	0
5110309060		male	1	0	0	1	1	0	0	0	0	2	3	1	0	0	0	0	0	0	1	1	2	2	3	4	1	3	3	2	2
5110309069		male	0	0	1	1	1	0	2	0	0	2	5	1	1	1	1	1	1	0	6	2	2	2	3	3	2	3	2	1	2
5110309072		male	1	0	0	1	0	0	0	0	0	1	2	1	0	0	0	0	0	0	1	1	1	1	3	3	3	3	3	1	1
5110309073		male	1	0	0	1	1	1	2	1	2	2	9	1	0	2	0	0	0	0	3	1	2	1	3	1	1	2	1	3	4
5110309075		male	0	0	0	1	0	0	0	0	0	1	1	0	0	0	0	0	0	0	0	1	1	2	3	3	1	3	3	1	1
5110309081		male	0	0	0	0	0	0	0	0	0	0	0	0	0	0	0	0	0	0	0	0	1	1	3	3	0	4	3	0	1
5110309083		male	1	0	0	1	1	1	1	1	0	2	6	1	1	0	1	0	1	0	4	2	2	2	2	2	2	2	2	2	2
5110309088		male	2	1	1	1	0	1	1	0	0	1	7	1	1	1	1	0	1	1	6	3	2	2	3	2	3	3	3	1	2
5110309089		male	0	0	0	1	0	0	0	0	0	1	1	1	0	0	0	0	0	0	1	1	1	2	2	3	1	3	2	2	1
5110309106		male	2	2	0	1	1	1	0	1	0	1	8	1	1	1	2	0	1	1	7	2	2	2	3	3	2	4	4	2	2
5110309107		male	1	0	0	1	0	0	1	0	0	2	3	0	1	1	0	0	0	0	2	2	2	0	3	3	1	4	3	2	1
5110309108		male	1	0	0	1	1	0	0	0	0	1	3	0	0	0	0	0	0	0	0	1	1	1	3	3	1	4	3	1	1
5110309110		male	1	1	0	1	1	1	1	0	0	2	6	0	0	0	0	0	0	0	0	2	1	2	3	3	1	4	3	1	1
5110309115		male	1	1	0	1	2	1	1	0	0	1	7	1	0	0	0	0	0	0	1	2	2	1	2	2	1	4	3	2	2
5110309116		male	0	0	0	0	0	0	1	0	0	1	1	1	1	0	1	0	0	0	3	1	1	1	3	3	1	4	4	2	1
5110309117		male	0	1	0	2	0	0	0	0	0	1	3	1	1	1	0	0	0	0	3	1	1	1	3	3	1	3	3	1	1
5110309118		male	1	0	0	1	1	1	1	1	0	1	6	1	0	0	0	0	1	0	2	2	3	2	3	2	2	2	2	1	2
5110309119		male	1	1	0	1	0	1	0	0	0	2	4	0	1	1	0	0	0	0	2	1	2	2	3	3	2	3	3	2	2
5110309123		male	1	0	1	1	1	0	0	0	0	2	4	0	0	1	1	0	0	0	2	1	1	1	3	2	2	3	2	1	1
5110309124		male	0	0	0	0	1	0	0	0	0	1	1	1	0	0	0	0	0	0	1	1	0	1	4	3	1	4	4	1	1
5110309134		male	1	1	1	1	1	1	1	1	0	2	8	1	0	0	1	0	1	0	3	1	2	2	3	2	2	3	3	1	2
5110309135		male	0	0	0	1	1	0	0	0	0	1	2	0	0	1	1	0	0	0	2	1	1	1	2	1	1	3	3	1	1
5110309139		male	0	0	0	1	0	1	0	0	0	1	2	1	0	1	0	1	0	0	3	1	1	1	3	3	1	3	4	1	1
5110309141		male	1	0	0	0	1	0	0	0	0	1	2	0	0	0	0	0	0	0	0	0	0	0	4	4	4	4	4	2	1
5110309142		male	2	1	1	2	1	0	1	0	0	2	8	1	1	1	1	2	1	0	7	2	2	2	3	3	2	2	2	2	2
5110309143		male	0	0	0	1	0	0	0	0	0	1	1	0	0	0	0	0	0	0	0	1	0	0	3	3	1	3	3	1	1
5110309144		male	1	0	1	1	0	0	1	1	0	2	5	1	1	0	1	0	0	0	3	2	2	2	1	3	1	2	3	2	2
5110309145		male	1	2	0	0	0	0	0	0	0	1	3	0	0	0	0	0	0	0	0	0	4	0	3	2	1	2	3	0	2
5110309148		male	0	1	0	1	0	0	0	0	0	1	2	1	0	1	0	0	1	0	3	2	1	2	3	2	1	2	3	2	1
5110309152		male	1	1	0	1	0	1	0	1	0	2	5	1	1	0	2	0	2	0	6	3	2	2	3	4	2	4	3	1	4
5110309153		male	1	1	0	1	0	0	1	0	0	1	4	1	1	1	0	0	0	0	3	2	2	2	3	3	1	3	3	1	1
5110309165		male	0	0	0	1	0	0	0	0	0	1	1	1	0	0	0	0	0	0	1	2	1	1	4	4	1	2	2	2	1
5110309173		male	0	0	0	0	0	0	0	0	0	0	0	0	1	1	1	0	0	0	3	1	1	2	4	4	1	4	4	1	1
5110309174		male	1	1	0	1	1	0	1	1	0	2	6	0	0	1	1	1	1	0	4	2	2	2	3	2	1	3	3	2	1
5110309187		male	0	0	0	0	0	0	0	0	0	0	0	0	0	0	0	0	0	0	0	0	0	0	4	4	0	4	4	0	0
5110309188		male	1	0	1	1	0	1	0	0	0	1	4	0	0	0	1	0	0	0	1	2	2	1	2	1	2	2	2	1	2
5110309189		male	0	0	0	0	0	0	0	0	0	0	0	0	0	0	0	0	0	0	0	0	0	1	3	3	0	3	4	0	0
5110309190		male	0	1	1	0	0	0	0	0	0	1	2	0	0	0	0	0	0	0	0	0	0	1	4	3	1	4	4	2	0
5110309191		male	0	1	0	1	0	1	1	1	0	1	5	1	0	2	2	1	0	1	7	3	2	3	4	2	2	4	2	2	2
5110309193		male	1	1	1	1	1	0	0	0	0	2	5	1	1	1	0	0	0	0	3	3	1	1	3	3	1	3	3	1	1
5110309194		male	1	1	1	1	0	1	0	0	1	2	6	1	0	1	0	0	1	0	3	2	1	2	2	1	1	3	2	2	2
5110309195		male	1	0	0	1	0	0	0	0	0	1	2	1	0	0	0	0	0	0	1	1	1	1	2	2	1	3	3	1	1
5110309196		male	0	0	1	1	0	0	2	1	0	1	5	1	1	1	1	1	1	0	6	1	1	3	4	3	1	2	3	1	2
5110309197		male	1	0	1	1	1	0	0	0	0	2	4	1	0	0	1	0	0	0	2	1	1	1	4	3	1	1	3	1	2
5110309198		male	1	0	0	1	1	1	1	0	0	2	5	0	0	0	0	0	0	0	0	1	1	2	3	3	1	4	4	1	1
5110309199		male	3	3	2	2	2	1	1	2	0	2	16	2	2	1	3	2	1	3	14	4	3	4	1	1	3	4	1	1	4
5110309200		male	0	0	0	0	0	0	0	0	0	0	0	0	0	1	0	0	0	0	1	1	0	2	3	2	1	3	3	1	0
5110309201		male	1	1	0	1	0	0	1	0	0	1	4	1	1	0	0	1	0	0	3	1	1	1	3	3	1	3	3	1	1
5110309202		male	1	1	1	1	1	1	1	0	0	2	7	1	1	1	1	1	1	0	6	1	1	1	3	2	2	2	2	2	2
5110309203		male	1	0	1	1	0	0	1	1	0	2	5	1	1	0	0	1	0	0	3	2	1	2	2	2	1	2	2	3	3
5110309204		male	1	1	0	0	1	0	0	0	0	1	3	1	0	0	0	0	0	0	1	1	1	1	3	3	1	3	4	1	1
5110309205		male	2	1	1	3	3	2	2	2	0	2	16	2	2	2	2	2	1	2	13	3	4	4	2	2	4	4	2	1	4
5110309206		male	1	1	0	1	1	1	0	0	0	2	5	1	1	1	0	0	1	0	4	2	2	2	3	3	2	3	3	1	1
5110309215		male	1	1	0	1	0	0	0	0	0	1	3	1	1	0	1	0	0	0	3	2	3	3	3	2	1	3	2	2	2
5110309216		male	1	1	0	1	1	0	1	0	0	1	5	1	1	2	1	0	1	0	6	1	1	2	3	3	1	3	3	2	1
5110309217		male	1	1	1	1	1	0	1	0	0	2	6	1	1	1	1	1	1	0	6	2	2	2	3	3	2	3	3	2	1
5110309224		male	1	1	0	0	0	0	1	0	0	1	3	1	0	0	0	0	0	0	1	1	1	1	3	3	1	3	2	2	1
5110309225		male	0	0	0	1	1	0	0	0	0	1	2	1	1	0	0	0	0	0	2	2	2	1	4	3	1	4	4	1	0
5110309227		male	1	1	1	1	1	1	1	0	0	1	7	1	0	0	0	0	0	0	1	1	0	1	4	4	1	4	4	1	1
5110309228		male	0	0	0	0	0	0	0	0	0	0	0	1	0	0	0	0	0	0	1	1	1	1	4	4	2	4	4	0	0
5110309229		male	1	1	1	1	1	1	1	0	0	2	7	1	1	0	1	0	0	0	3	2	1	1	3	3	1	4	3	1	2
5110309231		male	0	1	1	2	0	1	1	1	0	1	7	1	0	1	1	1	1	0	5	2	2	2	3	2	2	3	3	2	2
5110309232		male	0	0	0	0	0	0	0	0	0	0	0	0	0	0	0	0	0	0	0	0	1	0	4	4	0	4	4	0	0
5110309239		male	0	0	0	0	0	0	0	0	0	0	0	0	0	0	0	0	0	0	0	4	4	4	4	4	4	4	4	4	4
5110309240		male	1	1	0	1	1	1	0	0	0	2	5	1	1	1	1	0	0	0	4	2	2	3	3	2	2	4	3	4	2
5110309242		male	0	1	1	1	1	1	1	1	1	1	8	1	1	1	1	1	1	1	7	2	2	2	2	1	1	2	2	2	2
5110309246		male	1	1	0	0	1	0	0	0	0	1	3	0	0	0	0	0	0	0	0	1	2	2	2	2	2	2	2	2	2
5110309248		male	2	0	0	1	1	0	2	0	0	2	6	1	0	1	0	0	1	0	3	1	2	2	3	2	1	2	3	1	2
5110309250		male	1	0	0	1	0	0	0	0	0	2	2	0	0	0	0	0	0	0	0	1	1	2	3	3	1	4	4	0	1
5110309251		male	0	0	1	0	1	1	1	1	0	2	5	1	0	1	0	1	0	0	3	1	1	1	4	2	1	4	4	1	2
5110309254		male	1	1	0	1	1	1	0	0	0	1	5	1	0	0	0	0	0	0	1	0	3	2	3	3	1	2	3	1	1
5110309255		male	0	1	3	2	0	0	1	1	0	1	8	2	3	3	2	0	1	0	11	3	3	3	3	0	1	4	3	2	4
5110309256		male	0	1	1	1	1	1	1	1	0	2	7	1	1	1	1	1	1	1	7	2	1	1	3	2	2	1	3	2	3
5110309264		male	1	1	0	1	0	1	0	0	0	1	4	1	0	1	0	0	2	0	4	3	1	3	3	2	2	0	3	3	2
5110309265		male	1	1	1	1	0	1	1	0	1	2	7	1	1	0	0	0	0	0	2	3	3	3	2	2	2	4	2	2	2
5110309267		male	1	1	1	1	1	2	1	0	0	1	8	2	2	1	1	1	1	0	8	1	1	3	2	2	1	2	4	2	2
5110309268		male	0	0	0	0	0	0	0	0	0	0	0	0	0	0	0	0	0	0	0	2	0	1	3	3	1	4	4	1	1
5110309269		male	0	0	0	1	0	0	0	0	0	1	1	0	0	0	0	0	0	0	0	1	1	1	4	3	0	3	3	1	0
5110309270		male	0	1	0	1	1	0	1	0	0	1	4	1	1	1	0	0	1	1	5	2	2	2	4	2	2	1	3	2	1
5110309271		male	1	1	0	1	1	1	1	1	0	1	7	1	1	1	1	1	1	1	7	2	2	2	3	2	2	3	3	2	3
5110309272		male	1	1	0	1	1	0	0	0	0	1	4	1	1	1	1	0	0	0	4	0	0	0	4	3	0	3	4	1	1
5110309275		male	0	0	0	0	0	0	0	0	0	0	0	0	0	0	0	0	0	0	0	1	1	2	3	3	1	3	3	1	2
5110309276		male	0	0	0	0	1	0	0	0	0	1	1	0	0	0	0	0	0	0	0	1	1	2	3	3	1	4	3	1	1
5110309278		male	0	0	0	1	0	0	0	0	0	1	1	1	0	1	0	0	0	0	2	2	1	1	3	2	1	3	4	2	1
5110309279		male	1	1	0	1	0	0	0	0	0	1	3	1	0	0	0	0	0	0	1	2	2	2	3	2	1	4	3	2	2
5110309281		male	1	1	1	1	0	1	1	0	0	2	6	0	0	0	0	0	0	0	0	2	2	1	2	3	2	4	2	1	2
5110309283		male	0	0	0	1	0	0	0	0	0	1	1	1	0	1	0	0	0	0	2	1	1	2	4	2	1	2	2	3	1
5110309291		male	1	1	0	1	1	0	1	0	0	1	5	1	0	0	0	0	0	0	1	1	1	2	3	3	1	4	3	1	2
5110309292		male	0	0	1	1	0	0	0	0	0	1	2	0	0	0	0	0	0	0	0	0	0	1	4	2	0	2	4	1	0
5110309293		male	1	1	0	0	0	0	0	0	0	1	2	0	1	1	1	0	1	1	5	2	1	1	4	4	1	4	4	1	1
5110309294		male	0	0	0	0	0	0	0	0	0	0	0	0	0	0	0	0	0	0	0	1	1	1	3	3	1	1	3	2	1
5110309295		male	0	0	0	1	1	0	0	0	0	1	2	1	1	1	0	0	1	0	4	1	1	1	3	3	1	3	4	2	2
5110309296		male	1	2	0	1	1	0	1	1	0	1	7	1	0	1	1	0	1	1	5	2	2	2	2	1	2	3	3	1	2
5110309297		male	0	0	1	1	1	0	0	0	0	1	3	0	0	0	0	0	0	0	0	0	2	1	3	4	0	4	4	0	0
5110309298		male	0	0	0	1	1	1	0	0	0	1	3	0	0	1	0	0	1	0	2	1	1	2	3	3	1	4	4	1	1
5110309300		male	0	0	1	0	0	0	0	0	0	2	1	0	0	0	0	0	0	0	0	1	1	2	3	3	1	3	3	2	2
5110309301		male	1	1	1	1	1	1	1	1	0	2	8	1	1	1	1	1	1	0	6	1	1	1	1	2	1	3	2	1	1
5110309302		male	1	1	0	1	1	1	1	1	0	2	7	1	1	1	2	1	1	0	7	2	2	3	2	2	2	3	2	2	3
5110309303		male	1	1	1	1	0	0	0	0	0	3	4	1	1	1	0	0	0	0	3	1	1	2	2	3	1	2	3	2	1
5110309304		male	1	1	0	1	1	0	0	0	0	1	4	0	0	0	0	0	0	0	0	1	1	1	4	3	1	1	3	1	2
5110309305		male	0	1	0	1	1	1	0	0	0	1	4	1	0	1	1	0	0	0	3	2	1	1	3	3	1	3	3	1	1
5110309306		male	1	1	0	1	0	0	0	0	0	1	3	1	0	0	0	0	0	0	1	1	0	1	3	3	0	3	3	1	1
5110309307		male	3	2	3	3	3	1	2	1	0	2	18	2	2	2	2	2	2	1	13	2	2	2	2	2	2	2	2	2	2
5110309308		male	1	1	2	2	1	0	0	0	0	1	7	1	0	1	0	0	0	0	2	1	1	1	3	3	1	3	3	2	2
5110309309		male	1	1	1	1	1	0	1	0	0	1	6	1	1	1	1	1	1	1	7	2	2	2	2	2	2	2	2	2	2
5110309310		male	3	3	0	2	1	0	2	0	0	2	11	1	2	1	1	0	1	0	6	0	3	3	2	3	2	2	2	2	2
5110309318		male	1	0	1	1	1	0	1	0	0	1	5	1	0	1	1	1	0	0	4	2	1	2	2	2	1	3	3	1	1
5110309319		male	1	1	1	1	0	1	1	0	0	2	6	1	0	1	1	1	1	0	5	2	2	2	1	2	1	3	2	1	2
5110309320		male	1	0	0	0	0	0	0	0	0	1	1	0	0	0	0	0	0	0	0	1	1	1	3	3	1	3	3	1	2
5110309321		male	1	1	2	2	1	0	1	1	1	2	10	2	1	1	1	1	2	1	9	2	2	2	3	3	3	3	2	3	2
5110309323		male	0	0	0	0	0	0	0	0	0	0	0	0	0	0	0	0	0	0	0	1	1	2	3	3	0	3	3	1	1
5110309325		male	1	0	0	1	0	0	0	0	0	2	2	1	0	1	0	0	1	0	3	2	1	2	4	3	1	3	4	2	2
5110309327		male	0	0	1	0	1	0	0	0	0	1	2	0	0	0	0	1	0	0	1	0	1	0	3	4	1	3	2	1	1
5110309328		male	1	0	0	1	1	0	1	0	0	1	4	1	0	1	0	0	0	1	3	1	0	2	2	2	2	2	2	2	2
5110309332		male	0	1	1	1	0	1	1	0	0	2	5	1	0	1	1	0	0	0	3	2	2	2	3	2	2	3	2	2	2
5110309333		male	0	0	1	1	1	0	1	0	0	2	4	1	0	1	0	0	0	0	2	2	2	2	3	3	1	3	3	1	1
5110309334		male	1	1	0	1	0	0	1	0	0	2	4	1	1	1	1	1	0	0	5	2	2	1	3	3	2	4	3	2	1
5110309346		male	0	1	0	0	0	0	0	0	0	1	1	0	0	1	0	0	0	0	1	1	1	1	3	3	2	4	3	1	2
5110309347		male	0	0	0	0	0	0	0	0	0	0	0	0	0	1	0	0	0	0	1	2	2	2	3	3	1	2	3	3	1
5110309348		male	1	1	0	1	0	0	0	0	0	2	3	0	1	0	0	0	0	0	1	2	0	0	2	3	0	4	3	0	0
5110309349		male	0	1	0	1	0	0	0	0	0	1	2	0	0	0	0	0	0	0	0	2	1	2	3	3	2	3	3	1	1
5110309350		male	1	0	0	1	0	0	0	0	0	1	2	0	0	1	1	0	0	0	2	1	2	1	2	3	1	2	3	2	2
5110309351		male	0	0	0	0	1	0	0	0	0	1	1	1	0	1	0	0	0	0	2	1	0	1	4	3	1	4	4	0	1
5110309353		male	1	1	0	1	1	1	0	0	0	2	5	1	0	0	0	1	0	0	2	1	1	1	3	3	2	3	3	1	1
5110309355		male	1	0	0	1	1	0	0	0	0	1	3	1	1	1	1	0	0	1	5	2	2	2	3	2	1	3	3	2	2
5110309356		male	0	1	1	1	0	1	0	2	0	2	6	0	0	1	0	0	0	0	1	2	1	0	3	2	1	4	2	0	2
5110309357		male	1	0	0	1	1	0	1	0	0	2	4	1	1	2	0	1	0	0	5	1	2	2	3	2	2	3	2	2	4
5110309358		male	1	0	0	1	0	0	1	0	0	1	3	0	0	1	1	1	0	0	3	2	2	2	3	2	1	3	3	2	1
5110309359		male	0	0	0	1	0	0	0	0	0	1	1	0	0	0	0	0	0	1	1	1	1	1	3	3	1	3	3	1	1
5110309360		male	1	1	1	2	1	0	0	0	0	1	6	1	0	1	2	0	0	0	4	2	2	3	4	3	1	4	3	2	2
5110309361		male	1	1	1	1	0	1	1	0	0	2	6	1	1	1	0	1	2	1	7	2	2	2	2	1	2	2	2	3	2
5110309368		male	0	0	0	2	0	0	0	0	0	1	2	0	0	0	0	0	0	0	0	2	1	2	3	2	3	2	3	3	3
5110309370		male	1	1	1	1	1	0	0	0	0	1	5	0	0	0	1	1	0	0	2	2	2	2	4	3	1	4	4	0	1
5110309372		male	1	1	1	1	1	0	0	0	0	1	5	1	0	0	1	0	0	0	2	1	1	2	3	3	1	4	3	1	1
5110309375		male	0	1	0	0	1	1	0	0	0	1	3	1	0	0	0	0	1	1	3	1	2	3	3	4	2	4	3	1	2
5110309377		male	0	0	1	0	0	0	0	0	0	3	1	0	0	0	0	0	0	0	0	2	1	1	3	3	1	3	3	1	1
5110309378		male	1	0	0	1	0	0	1	0	0	1	3	1	0	0	1	0	1	0	3	1	1	1	1	2	2	3	3	1	1
5110309379		male	0	1	2	3	1	1	3	2	0	2	13	0	1	1	0	1	0	0	3	3	3	3	2	2	2	2	1	2	3
5110309380		male	1	0	0	0	1	0	1	0	0	1	3	0	0	0	0	1	0	0	1	1	1	2	3	4	1	3	4	1	1
5110309381		male	0	0	1	1	1	0	0	0	0	1	3	0	0	0	2	0	0	0	2	2	2	2	3	2	3	4	4	1	1
5110309384		male	2	1	1	2	1	0	1	0	0	2	8	1	1	1	0	0	1	0	4	1	1	2	3	3	2	3	3	2	2
5110309385		male	0	1	0	1	1	1	0	0	0	1	4	0	0	0	0	0	0	0	0	1	1	1	3	2	1	3	3	1	1
5110309386		male	0	0	2	2	2	1	3	1	0	1	11	1	1	1	1	0	0	0	4	0	0	0	4	4	0	4	4	0	0
5110309387		male	1	1	0	1	0	1	0	0	0	1	4	1	0	1	0	0	1	1	4	1	1	2	3	3	1	2	3	1	2
5110309393		male	3	1	2	3	2	1	1	1	0	2	14	1	1	0	0	1	1	0	4	1	2	2	2	2	2	3	2	1	2
5110309395		male	1	1	0	2	1	1	2	0	0	2	8	1	1	2	1	0	0	1	6	2	1	2	2	2	1	3	1	3	3
5110309398		male	1	1	1	1	1	1	1	1	0	2	8	1	0	1	1	0	0	1	4	2	2	2	2	2	2	2	2	2	2
5110309400		male	1	1	1	1	1	1	1	1	0	2	8	1	1	0	0	0	1	0	3	1	1	1	2	2	2	1	2	1	2
5110309401		male	1	0	0	1	1	0	0	0	0	1	3	0	0	0	0	0	0	0	0	0	0	0	4	3	0	4	4	0	0
5110309403		male	1	1	0	1	0	0	1	0	0	2	4	1	1	1	0	0	0	1	4	2	2	2	3	2	1	4	3	2	2
5110309405		male	1	1	3	1	0	0	2	1	0	1	9	1	1	1	0	0	1	0	4	1	2	1	1	3	2	3	3	3	2
5110309406		male	1	1	0	1	1	0	0	0	0	1	4	0	0	0	0	0	0	0	0	2	2	1	3	2	1	4	3	1	2
5110309407		male	0	0	0	0	0	0	0	0	0	0	0	0	0	0	0	0	0	0	0	1	2	2	3	3	2	4	2	1	1
5110309408		male	0	1	0	1	0	1	0	0	0	1	3	1	1	0	0	0	0	1	3	2	2	2	2	1	2	3	2	2	2
5110309409		male	0	1	1	0	0	2	1	0	0	1	5	0	1	2	0	0	0	1	4	3	3	3	1	2	2	4	1	0	2
5110309410		male	0	1	1	1	0	1	0	0	0	1	4	0	0	1	0	0	1	0	2	3	2	2	3	3	3	3	2	3	3
5110309411		male	1	1	0	1	1	0	0	0	0	2	4	1	0	1	0	0	0	0	2	1	2	2	3	4	1	3	3	2	2
5110309417		male	1	1	0	1	0	1	1	1	2	2	8	1	1	2	1	1	0	1	7	2	2	3	1	2	2	1	1	3	2
5110309418		male	0	0	0	0	0	0	0	0	0	0	0	0	0	0	0	0	0	0	0	0	0	1	3	3	1	4	3	1	1
5110309420		male	0	0	0	1	0	0	0	0	0	1	1	0	0	0	0	0	0	0	0	0	0	0	4	4	0	4	4	0	0
5110309421		male	1	1	1	1	2	1	1	0	0	2	8	1	1	1	1	1	0	0	5	3	3	3	2	2	1	3	2	2	2
5110309422		male	0	1	0	1	0	0	1	0	0	2	3	1	1	0	0	0	0	1	3	2	2	2	3	3	2	2	3	3	1
5110309426		male	0	0	0	0	0	0	0	0	0	0	0	0	0	1	0	0	0	0	1	2	2	2	3	3	2	3	3	2	2
5110309427		male	1	1	0	1	0	1	0	0	0	1	4	0	0	0	0	0	0	0	0	2	1	2	4	4	1	4	4	0	0
5110309430		male	1	1	0	1	0	1	1	0	0	1	5	1	0	1	1	1	1	0	5	1	1	2	3	3	1	4	3	2	1
5110309431		male	1	1	0	1	0	0	1	0	0	1	4	1	0	0	1	0	0	0	2	2	2	2	2	2	2	3	2	3	2
5110309432		male	0	0	0	0	0	0	0	0	0	0	0	0	0	0	0	0	0	0	0	1	1	1	3	2	1	3	3	1	1
5110309433		male	0	0	0	1	0	0	0	0	0	1	1	0	0	0	0	0	0	0	0	0	0	0	4	4	0	4	4	0	0
5110309435		male	1	1	1	1	1	0	0	0	0	1	5	1	1	1	2	0	1	0	6	2	2	3	2	2	2	3	2	2	2
5110309436		male	1	1	0	3	1	0	1	1	0	2	8	1	0	1	3	1	1	1	8	3	3	3	3	3	3	3	3	1	3
5110309437		male	0	0	0	0	0	0	0	0	0	0	0	0	0	0	0	0	0	0	0	1	1	1	3	3	1	3	3	1	1
5110309438		male	2	1	1	3	0	1	2	1	0	2	11	1	1	1	1	1	1	1	7	2	2	2	2	2	1	1	2	2	2
5110309445		male	1	0	0	0	1	0	0	0	0	2	2	0	0	0	0	0	0	0	0	1	4	2	4	4	4	4	4	1	1
5110309446		male	1	1	1	1	1	1	1	0	0	2	7	1	1	0	1	0	1	1	5	3	3	2	3	2	1	2	3	3	1
5110309447		male	1	0	0	0	0	0	0	0	0	1	1	0	0	0	0	0	0	0	0	2	1	1	4	4	1	4	4	1	1
5110309449		male	0	0	0	0	0	0	0	0	0	0	0	0	0	0	0	0	0	0	0	2	1	1	4	4	1	3	4	1	1
5110309451		male	0	1	0	1	0	0	0	0	0	1	2	1	0	1	1	0	0	0	3	1	1	1	1	3	2	2	4	0	2
5110309452		male	1	0	0	1	1	0	1	0	0	1	4	0	0	0	1	0	0	0	1	1	1	1	3	3	1	2	3	2	2
5110309453		male	0	1	1	1	0	0	1	0	0	2	4	1	0	0	1	1	0	0	3	0	0	0	0	0	0	0	0	0	0
5110309454		male	0	0	0	1	0	0	0	0	0	1	1	0	0	0	0	0	0	0	0	2	2	1	3	3	2	4	3	2	1
5110309455		male	1	1	0	1	0	0	0	0	0	1	3	0	0	0	0	0	0	0	0	0	0	1	0	4	0	4	4	0	0
5110309456		male	0	1	0	0	0	0	0	0	0	1	1	0	0	0	0	0	0	0	0	1	2	1	3	2	0	4	3	2	2
5110309457		male	0	0	0	0	0	0	0	0	0	0	0	0	0	0	0	0	0	0	0	1	1	1	3	3	1	3	3	1	1
5110309459		male	1	1	0	2	1	0	1	0	0	2	6	1	1	0	0	0	1	0	3	1	1	2	3	2	1	3	2	1	1
5110309460		male	1	1	1	1	1	1	0	0	0	2	6	1	1	1	0	1	1	0	5	1	1	1	3	2	1	3	3	1	1
5110309471		male	0	0	0	1	1	0	1	0	0	1	3	0	0	0	1	0	0	0	1	0	2	0	4	2	2	1	3	2	2
5110309473		male	1	1	1	2	2	2	1	0	0	2	10	1	1	1	1	2	1	0	7	3	2	2	2	1	2	2	1	2	3
5110309474		male	1	1	0	1	1	2	0	0	0	2	6	1	0	1	0	0	0	0	2	1	1	1	1	1	1	3	1	1	1
5110309475		male	1	0	0	1	0	1	1	0	0	2	4	1	0	0	0	0	0	0	1	1	1	1	3	3	0	4	3	1	1
5110309476		male	1	0	2	2	0	0	0	0	1	2	6	1	1	1	2	0	1	0	6	1	4	4	2	2	1	4	4	0	1
5110309478		male	0	0	0	1	0	0	1	0	0	1	2	0	0	0	0	0	0	0	0	0	1	1	2	2	1	4	3	1	1
5110309479		male	1	0	0	1	0	1	0	0	0	1	3	1	0	0	0	0	0	0	1	1	2	3	3	3	1	4	4	0	1
5110309484		male	1	1	0	1	0	1	0	0	0	1	4	1	0	1	1	0	0	0	3	2	2	2	2	2	3	3	3	2	2
5110309485		male	0	0	1	1	1	0	0	0	0	1	3	1	1	1	1	0	0	0	4	1	1	2	3	2	1	4	2	1	0
5110309486		male	1	0	0	1	1	0	1	0	0	1	4	1	0	0	0	1	1	1	4	1	1	1	1	1	1	1	1	1	1
5110309487		male	0	0	0	0	0	0	0	0	0	0	0	0	0	0	0	0	0	0	0	0	0	0	4	4	0	4	4	0	0
5110309494		male	0	0	0	0	0	0	0	0	0	0	0	0	0	0	0	0	0	0	0	0	0	1	4	4	0	4	4	1	0
5110309495		male	0	0	0	1	0	1	0	0	0	2	2	0	0	0	1	0	0	0	1	1	4	1	2	4	1	4	4	0	1
5110309496		male	1	1	1	1	3	0	0	0	0	2	7	1	1	0	1	1	0	0	4	1	1	1	3	3	1	4	3	2	1
5110309497		male	1	0	0	2	2	0	1	0	0	1	6	0	0	1	0	0	1	0	2	1	1	0	3	3	1	2	3	3	0
5110309498		male	1	1	1	2	1	0	1	0	0	2	7	1	0	0	2	1	1	0	5	1	1	2	2	2	1	3	3	1	1
5110309500		male	1	1	1	2	0	1	0	0	1	1	7	0	0	1	0	0	0	0	1	2	0	1	3	3	1	4	3	2	1
5110309501		male	1	1	0	2	3	1	1	1	0	2	10	1	1	1	2	0	0	0	5	1	1	2	3	2	1	3	3	1	1
5110309502		male	1	0	1	1	0	1	1	1	0	1	6	1	1	1	0	1	0	0	4	1	1	1	4	3	2	4	3	1	1
5110309503		male	0	1	0	2	0	0	0	0	0	1	3	1	0	1	0	0	0	0	2	2	2	2	3	2	1	3	3	1	2
5110309504		male	1	1	0	1	1	1	0	0	0	1	5	0	0	1	0	0	0	0	1	2	2	2	3	2	2	4	2	1	3
5110309505		male	1	1	0	1	1	2	1	0	0	2	7	1	1	1	1	0	1	0	5	2	3	2	1	2	2	2	2	1	2
5110309506		male	1	1	1	1	1	1	1	1	0	1	8	1	1	1	1	0	1	0	5	2	2	2	2	2	2	2	2	2	2
5110309507		male	1	2	0	3	3	1	0	1	1	1	12	2	2	3	3	0	1	0	11	4	3	3	4	1	3	4	3	1	2
5110309508		male	1	0	0	1	1	0	0	1	0	1	4	2	1	1	1	0	1	0	6	2	2	2	4	3	1	4	3	2	3
5110309509		male	1	0	0	1	1	0	0	0	0	1	3	2	0	0	1	0	0	0	3	2	0	3	4	3	0	4	4	1	1
5110309510		male	1	1	1	1	1	1	1	0	1	2	8	1	1	1	1	1	1	1	7	0	0	0	0	0	0	0	0	0	0
5110309511		male	0	0	0	0	1	0	1	0	0	1	2	0	0	0	0	0	0	0	0	1	1	1	2	2	2	3	3	2	2
5110309520		male	1	1	0	1	0	1	1	0	0	2	5	1	0	1	2	1	0	0	5	2	2	2	2	2	2	2	2	2	2
5110309521		male	0	0	0	0	0	0	0	0	0	0	0	0	0	0	0	0	0	0	0	1	0	1	3	3	2	3	4	2	2
5110309522		male	0	1	0	0	1	0	0	0	0	1	2	1	0	1	0	0	1	1	4	1	1	1	3	2	1	3	3	1	2
5110309526		male	1	1	1	1	0	0	1	0	0	1	5	1	0	1	1	0	1	1	5	2	1	1	3	3	1	3	4	1	2
5110309527		male	1	1	0	1	0	1	0	0	0	2	4	1	1	1	1	0	0	0	4	2	2	2	2	2	1	2	2	1	1
5110309529		male	0	0	0	1	0	0	1	0	0	1	2	1	1	0	0	1	0	0	3	1	3	2	1	2	1	2	2	2	3
5110309530		male	1	0	0	1	0	0	0	0	0	2	2	1	1	1	0	0	0	0	3	0	0	0	0	0	0	0	0	0	0
5110309533		male	0	1	1	2	2	1	1	0	0	2	8	2	2	2	0	0	1	2	9	2	2	3	2	3	2	4	3	2	3
5110309534		male	1	1	0	1	0	1	0	0	0	2	4	1	2	1	0	0	0	0	4	3	3	2	1	3	0	4	3	0	3
5110309535		male	0	1	0	1	0	0	0	0	0	1	2	0	0	1	1	0	1	0	3	2	2	1	4	3	2	2	3	2	1
5110309536		male	1	1	1	1	1	0	0	0	0	1	5	0	0	0	0	0	0	0	0	1	1	1	3	3	1	3	3	1	1
5110309545		male	1	0	0	1	0	0	1	0	0	1	3	0	0	0	0	0	0	0	0	0	1	0	3	3	1	3	3	1	1
5110309546		male	0	0	1	0	0	1	1	0	0	1	3	0	0	0	0	0	0	0	0	1	2	2	2	3	1	3	2	1	1
5110309548		male	0	0	1	1	1	0	0	0	0	2	3	0	0	0	1	0	0	0	1	1	1	2	3	2	1	3	3	1	0
5110309552		male	0	0	0	0	0	0	0	0	0	0	0	0	0	0	0	0	0	0	0	1	1	1	4	4	1	3	4	2	1
5110309553		male	1	1	0	1	0	0	0	0	0	1	3	1	0	1	0	0	0	1	3	2	2	3	1	2	2	4	2	0	3
5110309555		male	1	0	0	1	1	0	0	0	0	1	3	0	0	0	0	0	0	0	0	1	1	1	3	3	1	4	2	1	1
5110309558		male	1	0	0	0	1	0	0	0	0	2	2	0	0	0	0	0	0	0	0	1	1	1	3	3	1	3	4	1	1
5110309589		male	0	1	1	1	0	1	0	0	0	1	4	0	1	1	0	0	0	0	2	2	0	2	4	3	1	4	4	2	1
5110309595		male	0	1	0	1	0	0	0	0	0	1	2	0	0	1	0	0	0	0	1	2	1	2	3	2	1	3	3	1	1
5110309598		male	1	2	0	1	2	1	1	2	0	1	10	1	1	0	0	0	0	0	2	1	2	2	3	3	2	2	3	2	2
5110309599		male	0	1	0	0	0	0	1	0	0	1	2	1	1	1	1	0	0	0	4	1	0	1	3	2	1	4	3	1	1
5110309600		male	0	0	1	1	0	0	0	0	0	1	2	1	0	0	0	1	0	0	2	1	2	2	3	3	1	3	3	1	1
5110309607		male	1	2	1	0	0	3	1	0	0	2	8	1	1	2	1	0	1	1	7	2	2	2	2	2	2	2	2	2	2
5110309609		male	1	1	0	1	0	0	2	0	0	2	5	1	0	1	0	0	1	0	3	2	1	3	3	2	2	2	2	2	1
5110309611		male	1	1	0	1	1	0	0	1	0	2	5	1	0	1	1	0	1	0	4	2	2	2	3	3	2	3	3	2	3
5110309612		male	1	1	3	2	1	1	2	1	0	2	12	3	2	2	3	2	2	1	15	3	2	3	3	2	2	3	3	3	2
5110309613		male	0	0	0	0	0	0	0	0	0	0	0	0	0	1	0	0	0	0	1	2	1	2	3	3	2	3	3	1	0
5110309615		male	3	2	1	1	1	2	1	0	0	2	11	1	2	1	2	2	2	0	10	1	2	2	1	1	2	1	1	2	2
5110309616		male	0	0	0	1	1	0	0	0	0	1	2	1	0	1	0	0	0	0	2	1	0	1	3	2	0	3	3	1	1
5110309624		male	1	1	1	1	0	1	1	0	0	1	6	0	0	1	0	0	0	0	1	2	2	2	1	1	1	2	2	2	2
5110309625		male	0	1	1	1	0	0	0	0	0	1	3	0	1	0	0	0	0	0	1	2	1	1	3	2	1	3	3	3	1
5110309628		male	1	1	2	2	1	0	1	0	0	2	8	1	0	0	0	0	0	0	1	2	2	1	4	4	1	3	4	2	2
5110309630		male	1	1	1	1	1	1	1	1	1	2	9	1	1	1	1	1	1	1	7	2	2	2	2	2	2	2	2	2	2
5110309631		male	1	1	0	0	0	0	0	1	0	1	3	1	0	1	0	0	0	0	2	1	3	2	2	2	2	3	3	2	2
5110309632		male	1	0	1	1	1	1	0	0	0	1	5	0	0	0	0	0	0	0	0	2	1	1	3	3	1	3	3	2	1
5110309633		male	1	1	1	2	0	1	1	1	0	2	8	1	1	1	1	1	1	1	7	3	2	2	2	2	2	4	2	1	2
5110309634		male	1	1	1	1	1	1	1	0	0	2	7	1	0	1	0	0	1	0	3	2	2	2	1	2	2	2	2	3	2
5110309635		male	1	1	0	1	0	1	0	0	0	2	4	1	0	1	1	0	1	0	4	2	1	2	3	3	1	3	3	2	1
5110309638		male	0	0	0	1	1	0	1	0	0	1	3	0	0	0	0	0	0	0	0	1	2	1	1	3	2	3	2	2	2
5110309640		male	1	1	0	1	1	1	0	1	0	2	6	1	1	1	1	0	0	0	4	2	2	1	2	2	2	2	3	2	2
5110309649		male	0	0	0	0	0	0	0	0	0	0	0	0	0	0	0	0	0	0	0	0	0	0	4	4	1	4	4	1	2
5110309650		male	0	1	0	1	0	1	0	0	0	1	3	1	0	0	0	0	0	0	1	1	2	2	2	2	2	4	2	1	3
5110309651		male	1	1	1	1	0	1	0	0	0	1	5	1	1	1	0	0	0	0	3	1	1	2	3	3	2	2	3	2	2
5110309653		male	0	0	0	0	1	1	1	0	0	1	3	1	0	1	0	0	0	0	2	2	2	2	3	3	2	3	3	3	2
5110309655		male	0	0	1	1	1	0	0	0	0	1	3	1	0	1	0	0	0	0	2	1	1	1	2	3	1	4	3	1	1
5110309658		male	0	0	0	0	0	0	0	0	0	0	0	0	0	0	0	0	0	0	0	0	0	0	4	3	1	4	3	0	1
5110309659		male	0	0	1	1	0	2	0	0	0	1	4	1	0	1	1	0	0	0	3	1	2	3	4	2	1	4	3	1	3
5110309660		male	0	1	0	1	0	0	1	0	0	1	3	0	0	0	0	0	0	0	0	1	1	2	4	3	2	4	3	1	2
5110309662		male	1	0	0	1	0	1	1	0	0	1	4	1	1	1	2	0	1	1	7	2	1	2	4	4	1	2	4	2	1
5110309663		male	1	1	1	1	0	0	1	0	0	1	5	1	0	1	1	0	0	0	3	1	2	2	3	2	1	4	2	2	3
5110309665		male	1	0	0	2	0	0	0	0	0	1	3	1	0	0	2	0	0	0	3	2	0	2	4	3	3	4	3	0	0
5110309666		male	0	0	0	0	0	0	0	0	0	0	0	0	0	0	0	0	0	0	0	2	0	1	3	3	1	3	3	1	1
5110309667		male	0	1	0	1	0	1	0	0	0	1	3	1	1	1	0	0	0	1	4	2	2	2	2	3	1	1	2	3	2
5110309675		male	1	0	1	2	0	1	0	0	0	2	5	1	0	0	1	0	0	1	3	1	2	2	3	2	2	3	3	1	1
5110309676		male	1	1	0	1	0	1	1	0	0	2	5	0	1	1	0	0	0	1	3	2	2	2	3	1	2	3	3	2	2
5110309679		male	2	1	0	1	1	1	0	0	0	2	6	1	1	1	1	0	1	1	6	2	2	3	2	1	1	4	2	1	2
5110309681		male	0	0	0	1	0	0	0	0	0	1	1	1	0	0	0	0	0	0	1	1	1	1	3	3	1	3	3	1	1
5110309682		male	0	0	0	0	0	0	0	0	0	0	0	1	0	0	1	0	0	0	2	1	1	2	3	2	1	2	3	1	2
5110309683		male	0	0	0	0	0	0	0	0	0	0	0	0	0	0	0	0	0	0	0	0	0	0	3	4	0	4	4	0	0
5110309684		male	1	0	0	1	1	0	0	0	0	1	3	0	0	0	1	0	0	0	1	2	2	2	2	2	2	2	2	1	2
5110309685		male	1	0	0	1	1	0	0	0	0	2	3	1	0	0	0	0	1	0	2	2	1	2	4	3	1	3	3	2	1
5110309687		male	1	1	1	1	1	0	0	0	0	2	5	1	1	1	0	0	1	0	4	1	1	1	4	4	1	3	3	1	2
5110309688		male	1	1	0	1	0	1	0	0	0	2	4	1	0	0	0	0	1	1	3	2	1	3	4	2	1	4	4	3	2
5110309689		male	1	1	1	1	1	0	1	1	0	2	7	1	0	1	2	0	0	1	5	2	2	2	2	1	2	3	3	2	3
5110309690		male	2	1	1	1	2	2	2	1	0	2	12	2	2	2	1	2	2	1	12	1	2	3	1	1	3	1	1	3	3
5110309691		male	1	1	0	3	0	1	3	3	0	1	12	0	0	0	0	0	0	0	0	0	0	1	3	3	1	4	3	0	1
5110309693		male	1	0	1	1	1	0	1	0	0	2	5	1	0	1	1	0	0	0	3	1	2	2	2	2	3	4	2	0	2
5110309700		male	0	0	0	0	0	1	0	0	0	1	1	0	0	0	0	0	0	0	0	2	2	2	2	2	2	2	2	2	2
5110309701		male	1	1	0	1	1	0	1	1	0	2	6	1	0	1	0	1	0	0	3	1	2	1	2	2	2	3	2	1	1
5110309704		male	0	0	0	1	1	0	1	0	0	1	3	0	0	0	0	0	0	0	0	1	0	0	4	3	1	4	3	1	1
5110309705		male	0	0	1	1	0	0	1	0	0	2	3	1	0	0	0	0	0	0	1	1	1	2	2	2	1	1	2	2	3
5110309708		male	1	0	0	1	1	0	1	0	0	1	4	0	0	1	0	0	0	0	1	1	3	1	3	3	3	3	3	1	2
5110309710		male	1	1	1	1	1	0	1	0	0	1	6	1	0	1	1	1	1	0	5	1	1	1	3	2	2	3	3	1	1
5110309712		male	0	0	0	0	0	0	0	0	0	0	0	1	0	0	0	0	0	0	1	1	0	1	4	3	0	4	4	1	0
5110309714		male	1	1	0	1	0	1	0	0	0	1	4	1	0	1	0	0	0	0	2	2	2	2	1	2	1	3	2	1	2
5110309715		male	1	0	0	1	1	0	0	0	0	1	3	1	0	0	0	0	1	0	2	1	2	2	1	2	1	3	1	2	2
5110309727		male	0	0	0	1	1	0	0	0	0	1	2	0	0	1	1	0	1	0	3	2	3	2	3	3	2	3	3	2	2
5110309730		male	0	0	0	0	0	0	0	0	0	0	0	0	0	0	0	0	0	0	0	0	0	0	4	4	0	4	4	0	0
5110309740		male	1	1	0	1	1	0	0	1	0	2	5	0	0	1	1	0	0	0	2	2	3	2	2	2	1	4	3	1	1
5110309743		male	0	0	0	1	0	0	1	0	0	1	2	1	1	0	3	0	1	0	6	0	0	4	4	0	2	4	4	4	4
5110309744		male	0	1	1	1	0	0	0	0	0	2	3	1	0	0	1	0	1	0	3	3	2	2	3	2	2	3	2	2	1
5110309745		male	0	0	0	0	0	0	0	0	0	0	0	0	0	0	0	0	0	0	0	1	0	1	3	3	1	3	3	1	1
5110309747		male	1	0	1	0	0	0	0	0	0	1	2	0	0	0	0	0	0	0	0	1	1	1	2	2	2	2	2	2	2
5110309748		male	0	0	0	1	0	0	0	0	0	1	1	0	0	1	0	0	0	1	2	2	2	1	3	3	1	3	4	2	1
5110309749		male	0	0	0	0	1	0	1	0	0	1	2	1	0	0	0	0	0	0	1	1	1	1	3	3	1	3	4	1	0
5110309750		male	1	1	1	1	0	1	1	0	0	2	6	1	0	1	1	1	1	0	5	2	2	2	3	2	1	3	3	2	2
5110309751		male	1	1	1	1	2	0	0	0	0	2	6	1	0	0	0	1	0	0	2	2	2	3	1	2	2	3	2	3	3
5110309752		male	2	1	1	1	0	2	0	0	0	2	7	2	1	1	0	0	1	1	6	2	3	2	1	2	2	1	2	2	2
5110309753		male	0	0	0	0	0	0	0	0	0	0	0	0	0	0	0	0	0	0	0	0	0	0	4	4	0	4	4	0	0
5110309754		male	0	0	0	0	1	0	0	0	0	1	1	0	0	0	0	0	0	0	0	1	1	1	3	3	1	3	3	2	2
5110309755		male	1	1	0	1	0	0	0	2	0	2	5	1	1	0	0	0	0	0	2	2	1	1	3	3	3	3	3	2	2
5110309761		male	1	1	1	0	1	0	0	0	0	1	4	0	0	0	1	0	0	0	1	2	2	2	2	2	2	2	2	2	2
5110309762		male	2	1	1	1	1	0	1	1	0	2	8	1	1	1	1	1	1	0	6	2	2	2	3	3	2	4	3	0	2
5110309763		male	0	0	0	0	0	0	0	0	0	0	0	0	0	0	0	0	0	0	0	0	0	0	4	4	0	4	4	0	0
5110309764		male	0	0	0	1	0	0	0	0	0	1	1	0	0	0	0	0	0	0	0	1	1	1	3	2	1	3	3	1	1
5110309765		male	1	1	1	1	1	0	1	0	0	2	6	1	1	1	3	1	1	2	10	4	4	4	4	2	2	2	3	2	2
5110309766		male	0	0	0	0	0	0	0	0	0	0	0	0	0	0	0	0	0	0	0	2	1	1	3	3	1	4	4	0	1
5110309767		male	1	0	1	1	0	1	2	1	0	2	7	2	0	1	2	2	1	0	8	1	3	3	2	2	1	3	3	3	1
5110309768		male	1	1	1	1	1	1	1	1	1	2	9	1	1	1	1	1	1	1	7	2	2	2	1	1	2	2	2	2	2
5110309769		male	1	0	1	2	0	0	0	0	0	1	4	1	0	0	0	0	0	0	1	2	2	2	4	3	1	2	3	1	1
5110309770		male	1	1	1	1	3	0	0	0	0	1	7	0	2	2	1	0	0	1	6	2	3	2	1	2	2	3	2	1	2
5110309771		male	1	1	1	1	1	0	1	0	0	2	6	1	1	0	0	0	1	0	3	1	2	2	1	2	1	3	3	1	2
5110309772		male	0	1	0	1	0	0	0	0	0	2	2	1	0	1	0	0	0	1	3	2	2	2	3	3	2	4	3	1	1
5110309773		male	1	0	0	1	1	1	1	0	0	2	5	0	0	1	0	0	0	0	1	2	2	1	3	3	2	3	3	2	2
5110309775		male	2	1	0	1	1	1	1	1	0	2	8	1	1	1	1	1	1	1	7	2	2	2	2	2	2	2	2	2	2
5110309776		male	1	0	1	1	1	0	1	1	0	1	6	1	0	0	0	0	2	0	3	3	0	4	4	3	3	3	4	3	2
5110309777		male	1	1	2	1	2	0	1	0	0	2	8	1	1	1	1	1	1	1	7	2	0	2	4	4	2	4	4	2	2
5110309782		male	0	0	1	1	0	0	0	0	0	1	2	0	0	1	0	0	1	0	2	2	0	2	4	2	1	4	4	2	1
5110309783		male	1	1	0	1	0	1	1	0	0	1	5	1	1	1	1	0	1	0	5	2	2	2	3	3	1	3	3	3	2
5110309784		male	0	1	1	1	1	2	1	1	1	1	9	1	0	1	2	0	1	1	6	0	0	0	0	0	0	0	0	0	0
5110309785		male	1	1	0	1	1	1	0	0	1	1	6	1	1	1	1	1	1	1	7	2	2	2	3	3	0	4	4	1	2
5110309787		male	1	1	0	1	0	0	0	0	0	1	3	1	1	2	1	0	0	0	5	3	1	3	2	2	2	4	2	2	3
5110309788		male	1	1	1	1	1	1	0	0	0	2	6	1	0	1	1	0	1	0	4	2	3	2	1	1	2	4	2	1	3
5110309789		male	1	1	0	1	0	0	0	1	0	2	4	1	1	1	0	1	1	0	5	2	2	1	3	2	2	4	2	1	3
5110309792		male	1	1	0	1	0	1	0	0	0	1	4	1	1	1	0	0	1	1	5	2	2	2	2	2	2	2	2	2	2
5110309793		male	0	0	0	0	0	0	0	0	0	0	0	0	1	0	0	0	0	0	1	1	1	1	1	1	1	1	1	1	1
5110309794		male	0	0	0	1	1	1	0	0	0	1	3	0	0	0	0	0	0	0	0	2	2	2	2	2	2	2	2	2	2
5110309795		male	1	1	1	2	0	1	1	0	0	2	7	1	1	1	0	1	0	0	4	3	2	2	2	2	1	3	2	1	2
5110309796		male	1	0	1	1	1	0	0	0	0	2	4	0	0	0	1	0	0	0	1	2	3	3	3	3	1	4	3	1	1
5110309797		male	3	3	1	1	1	1	1	1	1	2	13	1	1	1	2	0	1	1	7	3	3	4	1	2	1	1	1	1	4
5110309801		male	0	0	0	1	0	0	0	0	0	1	1	0	0	0	0	0	0	0	0	1	1	1	3	3	1	4	4	1	1
5110309804		male	0	0	0	1	1	0	0	1	0	1	3	0	0	0	0	0	0	0	0	1	1	1	3	2	2	0	3	1	0
5110309805		male	1	1	1	1	1	1	1	1	0	2	8	1	1	1	1	0	1	0	5	2	2	2	2	2	2	2	2	2	2
5110309806		male	1	1	0	1	0	0	0	0	0	2	3	0	0	0	0	0	0	0	0	0	0	1	1	1	1	1	1	1	0
5110309807		male	3	2	0	0	0	1	3	1	1	1	11	1	1	1	0	1	2	0	6	3	2	2	1	1	1	4	3	1	3
5110309808		male	1	1	1	2	0	0	1	0	0	1	6	1	1	1	0	0	0	1	4	1	1	1	2	2	2	3	2	2	2
5110309809		male	0	0	1	0	0	0	1	0	0	1	2	0	0	0	0	0	0	0	0	0	0	1	4	3	1	4	4	0	1
5110309810		male	0	0	0	0	0	0	0	0	0	0	0	0	0	0	0	0	0	0	0	2	1	2	3	2	1	3	3	1	1
5110309811		male	1	1	1	1	1	1	0	0	0	2	6	1	1	1	2	1	1	0	7	2	2	3	2	1	3	2	2	2	3
5110309812		male	0	0	0	0	0	0	0	0	0	0	0	0	0	0	0	0	0	0	0	2	2	2	2	1	1	1	0	0	1
5110309814		male	0	0	1	1	0	0	1	0	0	1	3	0	0	0	1	0	0	0	1	0	0	0	0	3	2	3	3	0	2
5110309815		male	0	0	1	0	0	0	0	0	0	1	1	1	0	0	0	0	0	0	1	1	1	2	3	3	1	3	3	2	1
5110309816		male	1	1	0	3	0	1	0	0	0	2	6	1	1	1	0	0	0	0	3	2	2	2	1	2	2	3	2	2	3
5110309817		male	0	1	0	1	0	0	0	0	0	1	2	1	0	0	0	0	0	0	1	2	2	2	3	3	1	3	3	1	1
5110309818		male	0	1	0	1	1	0	0	0	0	2	3	1	0	0	0	0	0	0	1	1	2	1	4	3	2	4	3	1	2
5110309005		male	1	0	0	0	1	0	1	0	0	1	3	1	0	0	0	0	0	0	1	2	1	1	3	3	1	1	2	1	2
5110309051		male	1	1	0	1	0	0	1	0	0	1	4	0	1	0	1	0	1	0	3	3	1	1	3	2	1	2	2	2	1
5110309059		male	3	2	0	3	1	3	1	0	0	2	13	1	1	1	3	1	1	1	9	3	3	3	2	2	2	2	2	2	2
5110309064		male	1	1	0	1	0	1	2	0	1	2	7	2	1	1	2	1	1	2	10	2	3	2	1	2	3	3	2	3	3
5110309113		male	1	1	0	1	1	0	0	0	0	1	4	1	0	0	0	0	1	0	2	1	1	1	3	3	1	2	3	2	1
5110309122		male	1	0	0	1	1	1	1	0	0	2	5	1	1	0	0	0	0	1	3	2	1	2	3	3	1	4	3	1	2
5110309125		male	1	1	1	1	0	1	1	0	0	2	6	1	0	0	1	0	0	0	2	2	1	2	3	3	1	4	3	4	1
5110309126		male	2	2	2	2	2	2	2	1	0	2	15	2	1	2	1	2	1	1	10	2	2	2	2	2	2	2	2	2	2
5110309137		male	1	0	0	1	2	1	1	0	0	2	6	0	1	1	0	1	0	0	3	3	0	1	4	4	2	4	3	3	2
5110309151		male	1	1	1	1	0	1	1	1	0	2	7	1	0	1	1	1	1	0	5	2	2	2	3	3	2	2	3	2	3
5110309162		male	0	0	0	1	0	0	0	0	0	1	1	1	0	0	0	0	0	0	1	2	1	2	2	2	2	2	2	2	2
5110309163		male	1	1	0	1	0	1	1	0	0	2	5	1	1	1	2	0	1	0	6	3	2	2	3	2	1	2	3	2	1
5110309164		male	0	0	1	0	0	0	0	0	0	1	1	0	0	0	0	0	1	0	1	1	0	1	3	4	1	4	3	1	1
5110309167		male	1	0	1	1	1	1	1	0	0	1	6	2	1	1	0	1	0	0	5	1	1	1	1	1	1	1	1	1	1
5110309169		male	0	0	0	1	0	0	0	0	0	1	1	0	0	0	0	0	0	0	0	2	1	1	3	3	1	2	2	1	1
5110309170		male	1	1	1	1	1	0	1	0	0	1	6	1	0	0	1	0	0	0	2	1	0	1	4	3	1	4	4	1	0
5110309171		male	1	0	0	2	1	0	0	0	0	1	4	1	0	0	1	0	0	0	2	2	2	2	2	2	2	3	3	3	2
5110309172		male	1	0	1	1	0	0	1	0	0	2	4	1	0	0	0	0	0	1	2	2	2	3	3	3	2	3	2	2	2
5110309175		male	0	0	1	1	2	1	0	0	0	1	5	1	0	1	0	0	0	0	2	2	3	1	2	2	2	3	2	2	2
5110309176		male	1	1	0	0	0	1	0	0	0	2	3	0	1	1	0	0	1	1	4	2	1	2	3	3	2	3	2	2	2
5110309177		male	0	0	0	0	0	0	1	0	0	1	1	1	0	0	1	0	0	0	2	1	1	1	3	3	1	3	3	1	2
5110309178		male	3	0	0	1	2	2	2	1	0	2	11	0	2	2	2	1	1	2	10	3	3	1	1	2	3	4	1	2	3
5110309179		male	1	1	1	1	1	1	1	0	0	2	7	1	0	0	0	0	0	0	1	2	2	2	2	2	2	4	3	1	2
5110309192		male	1	2	1	2	0	2	1	0	1	2	10	2	2	1	2	1	1	0	9	1	1	1	1	1	1	1	1	1	1
5110309218		male	2	1	1	1	0	0	2	1	0	1	8	1	1	0	1	1	1	0	5	3	3	2	2	2	2	3	3	3	3
5110309219		male	1	0	1	1	1	0	1	0	0	1	5	1	0	0	1	0	1	1	4	3	3	2	3	2	3	2	2	3	2
5110309221		male	1	1	1	1	0	1	0	1	0	1	6	1	0	0	1	0	0	1	3	2	2	1	2	3	1	3	2	1	2
5110309222		male	1	1	1	1	1	0	1	1	0	1	7	1	0	0	0	0	1	0	2	1	1	2	3	2	1	3	4	2	1
5110309223		male	1	1	0	1	1	1	0	0	0	2	5	1	2	1	1	1	1	0	7	2	1	2	2	2	2	2	2	2	1
5110309226		male	0	0	0	1	0	0	0	0	0	1	1	0	0	0	0	0	0	0	0	0	0	1	4	4	0	4	4	0	1
5110309230		male	1	1	1	1	1	1	1	1	1	1	9	0	0	0	0	0	0	0	0	0	0	0	0	0	0	0	0	0	0
5110309241		male	1	1	0	0	0	0	2	1	0	1	5	0	0	0	0	0	0	0	0	2	2	1	3	3	3	3	3	1	0
5110309243		male	1	1	0	2	1	1	2	1	0	2	9	1	1	1	0	0	0	0	3	1	1	2	4	3	1	4	3	0	2
5110309244		male	0	0	0	0	0	0	0	0	0	0	0	1	0	0	0	0	0	0	1	1	0	1	4	4	2	4	4	0	2
5110309245		male	1	1	1	1	1	1	1	0	0	1	7	1	1	0	0	0	1	0	3	2	2	2	3	3	2	3	3	2	2
5110309252		male	1	0	0	1	0	0	1	0	0	2	3	0	0	0	0	0	0	0	0	2	3	1	3	2	1	4	4	0	1
5110309253		male	0	1	1	2	1	0	1	0	0	1	6	1	0	0	0	0	1	0	2	1	1	1	3	3	1	4	2	1	3
5110309266		male	0	0	0	0	0	0	0	0	0	0	0	0	0	0	0	0	0	0	0	1	1	1	4	3	2	4	4	0	0
5110309317		male	2	2	1	2	1	0	2	0	1	2	11	2	1	2	3	1	1	1	11	2	1	3	2	2	2	3	2	1	3
5110309330		male	2	2	0	0	1	0	1	0	0	2	6	0	0	0	0	0	0	0	0	0	1	2	2	2	2	3	2	1	1
5110309331		male	0	0	0	3	0	1	0	0	0	2	4	3	1	0	3	0	1	0	8	3	3	3	1	1	2	2	1	2	4
5110309335		male	1	1	1	1	1	0	1	1	0	2	7	1	1	1	1	0	1	0	5	1	1	1	3	3	1	3	3	1	1
5110309344		male	1	1	0	1	2	0	0	0	0	1	5	1	2	2	2	0	2	0	9	0	0	0	0	0	0	0	0	0	0
5110309369		male	0	1	1	1	1	0	0	0	0	2	4	0	0	0	0	0	0	0	0	2	1	3	3	2	1	4	3	2	1
5110309373		male	1	1	1	1	1	1	1	1	1	2	9	2	1	2	2	0	1	2	10	2	2	2	2	2	2	2	2	2	2
5110309374		male	1	1	0	1	0	0	0	0	0	1	3	0	0	1	0	0	0	0	1	2	1	2	2	2	2	2	2	1	2
5110309376		male	1	1	0	0	0	0	0	0	0	1	2	0	0	0	0	0	0	0	0	1	1	1	3	3	1	4	4	1	1
5110309382		male	0	0	0	1	0	0	1	0	0	1	2	1	0	0	0	1	0	0	2	2	2	3	4	3	1	4	3	0	2
5110309383		male	1	1	0	1	0	0	0	0	0	1	3	1	0	0	0	0	0	0	1	2	2	2	3	3	1	3	2	1	1
5110309394		male	1	1	1	1	0	1	0	0	0	1	5	1	0	0	0	0	1	0	2	2	1	2	2	3	1	4	4	2	1
5110309396		male	1	0	1	1	1	0	1	0	0	2	5	1	1	1	1	1	1	0	6	2	2	2	2	2	2	4	3	2	2
5110309397		male	0	0	0	0	0	0	0	0	0	0	0	0	0	0	0	0	0	0	0	0	0	0	2	2	0	3	3	1	0
5110309404		male	0	1	0	1	0	0	1	0	0	1	3	0	1	1	0	0	0	0	2	0	0	0	4	4	1	4	4	0	0
5110309412		male	1	1	0	1	0	1	0	1	0	1	5	1	0	1	1	0	1	0	4	1	1	1	3	2	2	3	4	2	2
5110309423		male	2	1	1	2	2	1	1	1	1	2	12	1	1	1	1	1	2	0	7	3	3	2	3	2	3	2	2	4	3
5110309424		male	1	1	1	0	0	1	1	0	1	2	6	1	1	1	1	1	1	1	7	3	2	2	2	2	2	2	2	2	2
5110309425		male	1	0	0	1	2	0	0	1	0	2	5	1	0	1	0	0	1	1	4	1	1	1	1	1	1	1	1	1	1
5110309434		male	2	1	0	0	1	0	1	0	0	2	5	1	2	1	3	0	0	0	7	2	3	3	4	3	1	4	3	1	1
5110309626		male	0	0	0	0	0	0	0	0	0	0	0	0	0	0	0	0	0	0	0	2	1	2	3	3	1	4	3	1	1
5110309657		male	1	0	1	1	1	0	0	0	0	1	4	1	0	0	0	0	0	0	1	2	1	1	3	3	2	4	3	1	1
5110309677		male	1	0	0	1	1	0	1	0	0	1	4	1	0	0	0	0	1	0	2	1	1	1	4	4	1	4	3	1	1
5110309680		male	1	1	0	1	1	1	1	0	0	1	6	1	1	1	0	0	0	1	4	2	2	3	2	2	2	3	3	3	1
5110309707		male	1	1	1	1	0	0	0	0	0	2	4	1	1	1	2	0	1	0	6	2	0	2	1	2	1	4	4	1	2
5110309711		male	1	1	1	1	0	0	0	0	0	1	4	1	0	0	2	0	0	0	3	2	2	2	3	2	1	3	3	1	1
5110309728		male	0	1	0	1	1	0	1	0	0	1	4	1	0	1	0	0	0	0	2	2	2	2	3	2	1	3	3	2	2
5110309729		male	1	1	0	1	1	0	0	0	0	1	4	1	0	0	0	0	0	0	1	1	0	2	3	3	1	4	4	2	1
5110309733		male	1	1	0	2	1	1	1	0	0	1	7	1	0	1	0	0	1	0	3	2	2	2	2	2	2	2	2	2	2
5110309734		male	1	1	1	1	1	1	1	0	0	2	7	1	1	1	0	0	0	0	3	2	1	3	3	3	2	4	4	1	1
5110309746		male	2	1	0	1	0	1	1	0	0	2	6	1	1	1	1	0	1	1	6	2	2	2	2	2	2	2	2	2	2
5110309781		male	1	1	0	1	1	1	0	0	0	2	5	1	0	1	0	0	1	1	4	2	2	2	2	2	2	2	3	2	2
5110309803		male	1	1	1	1	1	1	1	1	0	2	8	1	1	1	1	1	1	1	7	2	2	2	3	3	2	2	3	2	1
5110109001		female	1	1	0	0	0	0	0	0	0	1	2	1	1	1	1	0	0	0	4	2	2	2	3	3	2	2	3	2	2
5110109003		female	0	0	0	1	0	0	0	0	0	1	1	0	0	0	0	0	0	0	0	1	1	1	4	4	1	4	4	0	0
5110109004		female	0	0	0	1	0	0	0	0	0	1	1	0	0	0	0	0	0	0	0	0	1	0	4	3	0	4	4	0	1
5110109005		female	0	0	1	0	1	0	0	0	0	1	2	1	0	1	0	0	0	0	2	1	1	1	3	3	1	4	3	2	2
5110109025		female	1	1	0	1	0	1	3	0	0	2	7	1	0	0	0	0	0	0	1	2	3	2	2	1	1	4	3	2	2
5110109026		female	1	1	1	1	1	1	0	1	0	1	7	1	1	0	0	0	0	0	2	2	2	2	2	1	1	2	2	1	2
5110109029		female	1	1	1	1	0	0	0	1	0	1	5	1	0	1	0	1	1	0	4	1	1	1	2	2	2	2	2	2	2
5110109045		female	1	0	0	0	0	0	0	0	0	1	1	0	0	0	0	0	0	0	0	0	1	2	2	2	2	2	2	2	2
5110109046		female	1	1	1	1	1	0	0	0	0	2	5	1	2	2	0	0	0	1	6	1	1	2	3	3	1	4	3	0	1
5110109047		female	1	1	0	1	1	0	1	0	0	1	5	1	1	1	0	0	1	0	4	2	2	2	3	3	1	2	4	2	2
5110109048		female	2	1	0	1	1	0	0	0	0	2	5	1	1	1	1	1	0	0	5	2	2	2	1	3	2	2	2	2	2
5110109071		female	1	1	1	1	1	0	1	0	0	1	6	1	0	0	0	0	0	0	1	0	1	2	2	2	2	2	2	2	2
5110109073		female	0	0	0	1	0	0	0	0	0	1	1	0	0	0	0	0	0	0	0	1	1	0	3	3	1	3	3	1	0
5110109074		female	0	1	0	0	0	1	0	0	0	1	2	1	1	1	1	0	1	0	5	1	1	2	1	1	2	3	3	2	1
5110109096		female	1	1	0	1	0	0	0	0	0	1	3	0	0	0	0	0	0	0	0	1	1	2	3	3	1	3	3	2	2
5110109098		female	1	1	0	0	0	0	0	0	0	1	2	0	0	0	0	0	0	0	0	1	1	0	3	3	1	3	3	1	1
5110109099		female	0	1	0	1	0	0	0	1	0	1	3	1	1	0	0	0	1	0	3	1	0	1	4	4	0	4	4	2	1
5110109122		female	1	1	1	1	1	1	1	0	0	1	7	1	0	1	1	0	1	0	4	2	2	2	2	2	1	3	3	2	2
5110109123		female	1	1	0	1	2	0	2	0	0	1	7	1	1	0	1	0	1	0	4	2	2	2	2	2	1	3	2	2	1
5110109124		female	1	1	0	1	0	1	0	0	0	2	4	1	1	0	0	1	0	0	3	3	1	2	3	3	1	3	2	3	1
5110109125		female	1	1	0	2	1	1	1	1	0	1	8	0	1	0	0	0	1	1	3	2	1	1	3	2	2	1	2	2	1
5110109148		female	0	1	0	1	1	0	0	0	0	2	3	0	0	0	0	0	1	0	1	2	1	1	3	2	1	3	3	2	1
5110109149		female	1	0	0	0	0	0	1	0	0	1	2	0	0	0	0	0	0	0	0	1	0	0	3	3	0	3	3	1	1
5110109150		female	1	1	1	1	1	2	0	0	0	1	7	0	1	1	0	0	0	0	2	3	3	2	1	3	2	4	1	0	2
5110159003		female	0	0	0	1	1	0	0	0	0	1	2	1	0	0	0	0	0	0	1	1	1	1	4	4	1	4	4	1	1
5110159004		female	0	0	0	0	0	0	0	0	0	0	0	0	0	0	0	0	0	0	0	1	1	1	1	1	1	1	1	1	1
5110159006		female	0	1	0	2	0	0	0	0	0	1	3	1	0	0	0	0	0	0	1	1	1	2	3	2	2	4	3	2	3
5110159007		female	1	1	1	1	1	0	0	0	0	2	5	1	1	1	2	0	1	0	6	3	2	1	2	1	2	3	2	3	3
5110159019		female	0	1	0	0	1	0	0	0	0	2	2	0	0	0	0	0	0	0	0	1	1	2	3	3	0	3	3	1	0
5110159020		female	0	1	0	1	0	1	0	0	0	1	3	1	1	1	1	0	0	1	5	1	2	2	2	1	2	4	1	1	3
5110159021		female	0	0	0	0	0	0	0	0	0	0	0	0	0	0	0	0	0	0	0	1	0	0	4	3	1	4	4	0	0
5110159022		female	0	1	0	2	0	0	1	0	0	1	4	0	0	0	0	1	0	0	1	3	3	3	4	2	2	4	3	2	3
5110159023		female	1	1	0	0	0	0	0	0	0	1	2	0	0	1	1	0	1	0	3	1	0	1	3	3	1	4	4	1	1
5110159024		female	0	1	0	1	1	0	0	0	0	1	3	1	0	0	1	0	0	0	2	2	1	1	3	3	2	3	3	2	2
5110159025		female	1	1	1	1	1	0	1	0	0	1	6	0	0	0	0	0	0	0	0	0	1	0	3	3	1	3	3	2	2
5110159026		female	1	0	1	1	1	0	0	0	0	1	4	0	0	0	0	0	1	0	1	0	2	2	4	4	1	4	4	1	2
5110109027		female	0	0	0	0	0	0	0	0	0	0	0	0	0	0	0	0	0	0	0	1	1	1	4	3	1	4	3	1	0
5110109006		male	0	0	0	0	0	0	0	0	0	0	0	0	0	1	0	0	0	0	1	2	1	2	3	3	1	4	3	2	1
5110109007		male	0	0	0	0	1	0	0	0	0	1	1	0	0	0	0	0	0	0	0	0	1	1	4	4	1	4	4	4	1
5110109008		male	0	0	0	1	0	0	0	0	0	1	1	0	0	0	0	0	0	0	0	0	0	0	4	3	0	4	4	0	0
5110109009		male	1	0	0	1	0	0	0	0	0	1	2	0	0	0	0	0	0	0	0	1	1	2	3	3	2	2	2	2	2
5110109010		male	0	0	0	0	0	0	0	0	0	0	0	0	0	0	0	0	0	0	0	0	0	0	0	0	0	0	0	0	0
5110109011		male	1	1	2	1	1	0	1	0	0	1	7	1	1	1	0	0	0	0	3	2	0	1	4	3	1	4	4	2	1
5110109012		male	1	0	1	0	0	1	1	0	0	1	4	0	0	0	1	0	0	0	1	0	0	0	4	4	0	4	4	0	0
5110109017		male	1	1	1	1	1	1	2	1	0	2	9	2	1	1	2	2	2	1	11	2	2	3	2	2	3	2	3	2	2
5110109020		male	0	0	0	1	0	0	0	0	0	1	1	1	0	0	0	0	0	0	1	1	0	1	3	3	2	3	3	1	2
5110109022		male	0	0	0	1	0	0	0	0	0	1	1	0	0	0	0	0	1	0	1	1	1	1	4	3	1	3	4	1	1
5110109023		male	1	1	0	0	1	0	0	0	0	2	3	0	0	1	0	0	0	0	1	2	1	0	3	4	2	3	4	0	1
5110109051		male	1	1	1	1	0	0	0	0	0	1	4	0	0	0	0	0	0	0	0	0	0	0	3	3	0	3	3	1	1
5110109052		male	1	1	0	1	0	0	1	0	1	1	5	0	0	0	0	0	1	0	1	1	2	1	3	2	1	2	2	2	2
5110109053		male	1	1	0	0	0	1	0	0	0	2	3	1	1	1	1	0	1	0	5	2	2	2	2	2	2	2	2	2	2
5110109054		male	1	1	1	1	0	0	1	0	0	1	5	0	0	0	0	0	0	0	0	1	1	1	3	3	1	2	3	2	1
5110109055		male	0	1	1	1	0	1	0	1	0	1	5	1	1	1	1	1	1	0	6	2	3	2	2	2	1	2	3	2	1
5110109056		male	1	0	0	1	1	0	0	0	0	1	3	0	1	0	0	0	0	0	1	1	1	1	4	3	1	3	4	1	1
5110109057		male	1	1	1	2	1	0	1	1	0	2	8	1	1	0	1	1	1	0	5	3	2	2	2	2	2	2	2	2	2
5110109058		male	0	0	0	0	0	0	0	0	0	0	0	0	0	0	0	0	0	0	0	0	0	0	0	0	0	4	4	0	4
5110109059		male	0	0	0	0	0	0	0	0	0	0	0	0	0	0	0	0	0	0	0	0	0	0	4	4	0	4	4	0	0
5110109060		male	0	0	0	0	0	0	0	0	0	0	0	0	0	0	0	0	0	0	0	0	0	0	4	3	0	0	4	0	0
5110109061		male	1	1	1	1	1	1	1	1	0	1	8	1	0	0	0	1	1	0	3	2	2	2	3	2	2	2	2	2	2
5110109062		male	0	0	0	0	0	0	0	0	0	0	0	1	0	0	0	0	0	0	1	2	2	1	3	3	1	3	3	0	1
5110109063		male	0	0	0	0	0	0	0	0	0	0	0	0	0	0	0	0	0	0	0	1	1	2	3	3	2	3	3	1	2
5110109064		male	0	1	0	1	0	1	1	0	0	1	4	1	0	0	1	1	0	0	3	1	1	2	3	3	1	4	3	1	2
5110109065		male	0	0	0	0	0	0	0	0	0	0	0	0	0	0	0	0	0	0	0	2	0	2	4	4	2	4	4	1	0
5110109066		male	0	0	1	1	0	0	0	0	0	1	2	0	0	0	0	0	0	0	0	1	1	1	3	3	1	3	3	1	1
5110109067		male	1	1	0	0	0	0	0	0	0	1	2	0	0	1	0	0	0	0	1	1	1	1	3	3	2	3	3	1	1
5110109068		male	1	0	1	1	0	1	0	0	0	1	4	1	1	0	0	0	1	0	3	2	2	2	2	1	1	1	2	3	3
5110109069		male	2	1	1	2	3	0	1	0	0	2	10	0	1	1	1	0	2	0	5	1	1	1	1	1	1	1	1	1	1
5110109078		male	0	0	0	0	0	0	0	0	0	0	0	0	0	0	0	0	0	0	0	1	0	1	4	4	0	4	4	0	0
5110109079		male	0	0	0	0	0	0	0	0	0	0	0	0	0	0	0	0	0	0	0	1	4	1	4	4	0	4	4	0	0
5110109083		male	1	0	1	2	0	0	0	0	0	2	4	0	0	0	0	0	0	0	0	2	1	2	4	3	1	4	4	1	1
5110109088		male	0	0	0	0	0	0	0	0	0	0	0	0	0	0	0	0	0	0	0	0	0	0	4	4	0	4	4	1	0
5110109089		male	0	0	0	1	0	0	1	0	0	1	2	0	0	0	0	0	0	0	0	1	1	0	3	4	1	4	3	1	1
5110109091		male	1	1	0	0	1	0	0	0	0	1	3	0	0	0	0	0	1	0	1	1	2	2	3	3	1	4	3	1	1
5110109092		male	0	0	0	0	0	0	0	0	0	0	0	0	0	0	0	0	0	0	0	0	0	0	3	3	0	3	3	0	0
5110109093		male	1	1	1	0	2	0	0	0	0	1	5	1	0	1	0	0	1	0	3	1	1	2	3	3	1	3	3	2	1
5110109094		male	0	0	0	1	0	0	0	0	0	1	1	1	0	0	0	0	0	0	1	1	1	1	4	3	1	3	4	1	1
5110109102		male	0	0	0	1	0	0	1	0	0	2	2	1	0	1	0	0	0	0	2	2	2	2	2	2	2	2	2	2	3
5110109106		male	0	0	0	0	0	0	0	0	0	0	0	1	0	1	0	0	0	0	2	2	1	2	2	3	2	3	3	2	2
5110109108		male	1	1	1	1	1	0	1	0	0	2	6	1	0	0	0	1	0	0	2	3	2	2	3	2	2	3	3	2	2
5110109110		male	0	0	0	0	0	0	0	0	0	0	0	0	0	0	0	0	0	0	0	2	1	2	3	3	1	4	2	1	1
5110109111		male	0	0	0	0	0	0	0	0	0	0	0	0	0	0	0	0	0	0	0	1	1	2	3	3	2	3	4	2	3
5110109112		male	0	0	0	0	0	0	0	0	0	0	0	1	0	0	0	0	0	0	1	1	2	1	1	2	2	3	2	1	1
5110109113		male	0	0	0	0	0	0	0	0	0	0	0	0	0	0	0	0	0	0	0	0	0	0	4	4	0	4	4	0	0
5110109114		male	1	1	1	1	1	0	1	0	0	1	6	1	0	0	1	0	1	0	3	2	2	2	3	3	1	2	3	3	2
5110109115		male	1	0	0	1	1	0	1	0	0	1	4	1	0	1	0	0	0	0	2	1	1	1	3	3	1	4	3	1	2
5110109118		male	1	1	0	1	1	0	0	0	0	1	4	0	0	0	0	1	0	0	1	1	0	1	1	4	0	4	4	0	1
5110109126		male	1	0	0	1	0	1	1	0	0	2	4	1	0	1	0	0	0	0	2	2	1	2	2	2	2	4	2	1	2
5110109127		male	0	1	0	1	0	1	0	0	0	1	3	0	0	0	0	0	0	0	0	1	2	1	3	3	1	4	3	2	2
5110109128		male	1	0	0	1	1	0	1	0	0	2	4	1	1	0	1	1	1	0	5	1	1	2	3	2	1	3	2	2	1
5110109132		male	1	0	1	1	0	0	0	0	0	1	3	0	0	0	0	0	1	0	1	1	1	0	3	4	1	4	4	2	1
5110109134		male	3	2	0	1	1	0	1	0	0	2	8	0	0	0	0	0	0	1	1	1	3	1	0	2	3	4	1	2	3
5110109135		male	1	1	1	1	0	0	1	0	0	1	5	1	0	0	0	0	1	0	2	1	1	1	3	3	1	4	3	1	1
5110109136		male	1	1	0	0	0	0	0	0	0	1	2	0	0	1	0	0	0	0	1	2	1	2	3	3	1	4	4	1	1
5110109138		male	0	1	0	0	0	0	0	0	0	1	1	0	0	0	0	0	0	0	0	1	0	1	4	4	1	4	4	0	1
5110109139		male	1	0	1	1	0	1	3	0	0	2	7	0	1	0	0	1	0	0	2	3	2	2	2	2	2	3	2	2	2
5110109143		male	1	1	0	0	0	0	2	0	0	2	4	0	1	1	0	0	0	1	3	1	2	1	3	2	2	3	3	2	2
5110109144		male	1	1	0	1	0	0	1	0	0	2	4	0	1	0	0	0	1	0	2	2	1	1	3	3	1	4	3	0	0
5110109147		male	1	0	0	0	0	0	0	0	0	1	1	0	0	0	1	0	0	0	1	1	1	2	3	3	1	3	3	1	1
5110109151		male	1	1	0	1	2	0	0	0	0	1	5	0	0	1	0	0	0	0	1	1	0	1	4	4	1	4	4	1	2
5110109152		male	0	0	0	1	0	0	0	0	0	1	1	0	0	0	0	0	0	0	0	1	1	2	3	3	1	3	3	1	1
5110109153		male	0	0	0	0	0	0	0	0	0	0	0	0	0	0	0	0	0	0	0	1	0	0	3	3	2	3	3	1	1
5110109154		male	0	0	0	1	0	0	0	0	0	2	1	1	0	0	0	0	0	0	1	2	1	3	4	4	0	3	4	2	1
5110109155		male	0	0	0	1	0	0	0	0	0	1	1	0	0	0	0	0	0	0	0	0	0	0	2	3	1	3	3	0	1
5110109156		male	1	1	1	1	1	0	0	1	0	1	6	1	1	2	1	1	1	1	8	2	2	2	1	1	2	4	3	2	4
5110109157		male	0	0	0	0	0	0	0	0	0	0	0	0	0	0	0	0	0	0	0	1	1	1	3	3	2	2	3	2	2
5110109158		male	0	0	0	0	0	0	0	0	0	0	0	0	0	0	0	0	0	0	0	1	1	2	2	4	1	4	4	1	1
5110109159		male	0	0	0	0	0	0	0	0	0	0	0	0	0	0	0	0	0	0	0	2	1	1	4	4	0	3	4	2	0
5110109160		male	1	1	2	1	1	0	0	0	0	2	6	1	0	0	1	0	0	0	2	2	1	2	3	3	1	4	3	1	1
5110109161		male	0	0	0	1	0	0	0	0	0	2	1	1	0	0	0	0	0	0	1	1	1	1	4	4	0	4	4	0	0
5110109162		male	1	0	0	1	1	0	0	0	0	1	3	1	0	1	1	1	1	0	5	1	1	2	2	3	1	3	3	0	1
5110109163		male	0	0	0	0	0	0	0	0	0	0	0	0	0	0	0	0	0	0	0	1	1	1	3	3	1	3	3	1	1
5110109164		male	1	1	0	1	0	0	0	0	0	1	3	1	0	0	0	0	0	0	1	1	1	2	4	3	1	4	4	1	0
5110109165		male	1	1	1	0	0	0	0	0	0	1	3	1	0	0	0	0	0	0	1	1	1	1	3	3	1	4	3	1	1
5110109166		male	1	0	1	1	0	0	1	0	0	1	4	1	0	0	2	1	0	0	4	2	2	2	3	3	2	4	3	3	2
5110109167		male	0	0	0	0	0	0	0	0	0	0	0	0	0	0	0	0	0	0	0	0	1	1	3	3	1	3	3	1	1
5110109168		male	0	0	0	0	0	0	1	0	0	1	1	0	0	0	0	0	0	0	0	1	1	1	3	3	0	4	3	0	1
5110109169		male	1	0	0	1	1	0	0	0	0	1	3	0	0	0	0	0	0	0	0	1	0	1	3	3	1	4	4	0	2
5110109170		male	1	1	1	1	1	1	1	1	0	3	8	1	0	1	0	0	0	0	2	2	2	2	3	2	1	3	4	2	1
5110109171		male	1	1	1	1	1	1	1	0	1	2	8	1	1	1	1	1	1	0	6	2	2	2	2	2	2	2	2	2	2
5110109172		male	1	0	0	1	0	0	1	0	0	1	3	0	0	0	0	0	0	0	0	1	1	1	3	3	1	2	3	0	1
5110109181		male	0	0	0	0	0	0	0	0	0	0	0	0	0	0	0	0	0	0	0	2	1	1	3	3	2	2	2	2	2
5110159009		male	1	1	0	1	0	0	0	0	0	2	3	1	1	1	1	0	1	0	5	2	2	3	3	2	1	4	4	3	2
5110159013		male	1	1	1	1	1	1	1	0	0	2	7	0	0	1	0	0	0	0	1	2	2	2	2	2	2	3	2	2	2
5110159014		male	1	0	0	0	1	0	0	0	0	1	2	1	0	0	0	0	0	0	1	0	0	2	3	3	0	3	3	2	2
5110159015		male	0	0	1	2	0	0	1	1	0	1	5	1	2	2	1	1	0	2	9	1	1	2	3	3	1	4	3	0	2
5110159027		male	0	1	0	0	0	0	0	0	0	1	1	0	0	0	1	0	0	0	1	2	0	3	4	3	1	3	4	1	1
5110159028		male	0	1	0	0	0	0	0	0	0	1	1	0	0	0	0	0	0	0	0	0	0	0	4	4	0	4	4	0	0
5110159029		male	0	1	0	0	0	0	0	0	0	2	1	1	0	0	0	0	0	0	1	1	1	2	3	3	1	3	3	1	1
5110159030		male	0	1	0	0	1	1	0	0	0	2	3	1	1	1	0	0	1	0	4	2	4	1	3	0	2	4	3	2	3
5110159031		male	0	1	0	0	0	1	0	0	0	1	2	1	0	0	0	0	0	0	1	2	0	1	4	3	1	4	4	0	1
5110159032		male	1	1	0	1	0	0	0	0	0	2	3	1	1	1	1	0	0	0	4	2	1	2	3	3	1	4	3	2	1
5110159034		male	1	1	0	0	1	1	0	0	0	1	4	1	0	1	0	0	1	0	3	2	1	2	2	2	3	4	4	2	1
5110159035		male	1	1	0	1	0	0	0	0	0	2	3	1	0	0	0	0	0	0	1	2	0	0	3	3	2	4	3	2	1
5110109082		male	0	0	0	1	1	0	0	0	0	1	2	0	0	0	0	0	0	0	0	0	0	0	3	3	1	3	3	0	1
5110109101		male	1	0	0	0	0	0	0	0	0	2	1	0	0	1	0	0	0	0	1	1	1	1	3	3	1	3	3	1	1
5110159012		male	1	1	0	0	1	1	2	0	0	1	6	1	1	0	2	1	1	1	7	2	2	2	2	2	2	2	2	2	2
5111209008		female	0	1	1	1	0	0	0	0	0	1	3	0	0	0	0	0	1	0	1	1	0	2	3	3	1	4	4	1	1
5111209009		female	1	1	0	1	1	1	1	1	0	2	7	1	1	1	1	1	1	1	7	2	2	2	2	2	2	2	2	2	2
5111209014		female	1	1	0	1	1	1	1	0	1	2	7	1	1	1	0	0	1	0	4	3	2	2	4	3	1	3	4	4	1
5111209028		female	0	0	0	1	0	0	0	0	0	1	1	0	0	0	0	0	1	0	1	1	1	1	3	4	0	2	3	1	0
5111209029		female	1	1	1	1	0	1	1	0	0	1	6	1	1	1	1	1	1	0	6	2	2	2	3	3	2	4	3	1	2
5111209030		female	1	1	1	1	1	0	1	1	0	2	7	1	0	0	1	0	1	0	3	2	2	2	3	3	2	3	3	1	2
5111209031		female	1	0	0	1	0	0	0	0	0	1	2	0	0	0	0	0	0	0	0	1	0	1	3	3	1	3	3	1	1
5111209033		female	1	0	0	1	1	0	0	0	0	1	3	1	0	0	0	0	0	0	1	1	1	1	3	3	0	3	3	1	1
5111209035		female	1	0	1	0	0	0	0	0	0	1	2	0	0	0	0	0	0	0	0	1	1	1	2	3	2	4	3	2	2
5111209036		female	1	1	0	1	0	1	0	0	0	1	4	0	1	0	1	1	0	1	4	2	3	2	2	3	2	4	3	2	2
5111209037		female	0	0	0	0	0	0	0	0	0	0	0	0	0	0	0	0	0	0	0	1	1	0	4	4	1	4	4	1	0
5111209038		female	1	1	0	1	1	0	1	0	0	2	5	1	1	1	1	0	1	0	5	2	2	2	2	2	1	4	2	1	2
5111209039		female	1	1	2	1	2	1	0	0	0	2	8	1	0	1	1	0	1	0	4	2	2	2	3	3	1	3	3	1	2
5111209040		female	1	1	1	1	1	1	1	0	0	2	7	0	0	1	0	0	1	0	2	3	2	2	2	2	2	1	2	1	2
5111209041		female	2	1	0	1	0	0	1	0	0	1	5	1	0	1	0	0	0	0	2	2	1	1	3	3	2	4	4	1	1
5111209042		female	1	1	0	1	0	0	0	0	0	1	3	0	0	0	0	0	0	0	0	2	2	0	3	2	0	3	3	1	1
5111209043		female	1	1	0	1	0	0	0	0	0	1	3	1	0	0	0	0	0	0	1	1	1	2	4	4	1	4	4	1	1
5111209055		female	1	0	0	1	1	0	1	0	0	1	4	0	0	1	0	0	0	0	1	2	1	2	2	3	1	3	2	2	1
5111209059		female	1	1	0	1	3	0	0	0	0	1	6	1	0	1	1	0	1	2	6	2	2	2	4	3	2	3	4	2	2
5111209062		female	1	1	1	1	1	1	1	1	0	2	8	1	1	2	1	1	1	1	8	3	2	3	2	1	2	3	2	2	3
5111209065		female	3	2	0	3	1	1	1	1	1	2	13	0	2	2	1	0	0	1	6	1	4	3	2	3	3	2	3	1	3
5111209076		female	0	0	1	1	0	0	0	0	0	2	2	0	0	0	0	0	0	0	0	1	1	1	4	3	0	3	3	1	1
5111209077		female	1	1	1	1	1	1	1	1	0	2	8	1	1	0	0	0	0	0	2	1	1	1	3	3	1	4	4	1	1
5111209078		female	0	0	1	1	0	0	1	0	0	2	3	1	1	1	0	0	0	1	4	2	1	1	3	3	0	3	3	2	2
5111209079		female	1	1	1	1	1	1	0	0	0	2	6	1	0	0	0	0	0	0	1	0	2	2	2	2	2	2	2	2	2
5111209081		female	1	1	1	1	2	0	0	0	0	1	6	1	0	1	1	0	0	0	3	2	3	2	2	2	2	4	3	1	1
5111209082		female	0	0	0	0	0	0	0	0	0	0	0	0	0	0	0	0	0	0	0	0	0	0	4	4	0	4	3	0	0
5111209084		female	1	0	0	1	0	0	1	0	0	1	3	0	0	0	1	1	0	0	2	2	2	1	3	3	2	3	3	1	2
5111209085		female	1	1	1	1	1	1	1	0	0	1	7	1	1	1	1	1	1	1	7	3	3	3	2	1	3	2	2	3	3
5111209086		female	1	1	0	1	0	1	1	0	0	2	5	0	1	1	1	0	1	0	4	2	1	1	3	3	1	4	3	1	1
5111209087		female	1	1	0	1	1	0	0	0	0	1	4	1	1	0	1	0	1	0	4	1	1	2	4	4	0	4	4	2	1
5111209088		female	1	1	0	1	1	0	3	0	0	1	7	1	1	2	1	0	1	0	6	3	3	3	2	2	2	4	2	1	3
5111209089		female	1	0	0	1	0	0	1	0	0	1	3	1	0	0	1	1	1	0	4	2	1	2	3	2	1	3	3	1	0
5111209090		female	1	0	0	0	0	0	0	0	0	1	1	1	0	0	0	0	1	0	2	1	1	1	3	3	2	4	3	2	1
5111209091		female	1	1	1	1	1	1	1	1	1	1	9	0	0	0	0	0	0	0	0	1	1	1	3	3	2	3	3	2	2
5111209102		female	1	1	0	1	0	0	0	0	0	1	3	1	0	1	2	0	0	0	4	1	1	2	3	2	2	4	4	1	2
5111209103		female	1	1	1	1	1	1	1	0	0	2	7	1	1	1	1	0	0	0	4	1	2	3	2	3	1	3	3	2	2
5111209104		female	1	1	0	1	1	1	1	0	0	2	6	1	0	1	0	0	0	1	3	2	1	2	2	3	2	3	2	1	2
5111209106		female	1	1	0	1	1	1	1	1	1	2	8	1	1	1	1	0	1	0	5	2	2	2	2	3	2	3	2	3	3
5111209108		female	0	0	0	0	0	0	0	0	0	0	0	0	0	0	0	0	0	0	0	1	1	1	3	2	1	2	2	1	1
5111209112		female	2	1	1	2	1	1	1	1	0	2	10	2	2	2	2	2	2	0	12	2	2	2	2	2	2	2	2	2	2
5111209114		female	1	0	2	1	0	0	0	0	0	1	4	0	0	0	0	0	0	0	0	0	0	0	3	3	1	2	3	2	1
5111209115		female	2	2	1	1	1	2	1	1	0	2	11	2	2	2	2	2	2	0	12	1	1	1	2	3	2	3	1	2	2
5111209125		female	3	1	0	1	0	1	3	1	0	2	10	1	3	3	2	1	3	1	14	3	3	3	1	1	2	4	1	4	3
5111209126		female	0	0	0	0	0	0	0	0	0	0	0	0	0	0	0	0	0	0	0	1	1	2	3	4	1	4	4	1	1
5111209128		female	1	1	0	2	0	0	3	1	0	2	8	1	2	1	1	1	0	1	7	2	2	3	3	3	2	3	3	2	3
5111209129		female	1	0	0	1	0	0	1	0	0	2	3	0	0	0	1	1	1	0	3	2	2	2	2	2	2	2	2	2	2
5111209131		female	1	1	0	1	1	0	0	0	0	2	4	0	0	0	0	0	0	0	0	1	1	1	3	3	0	4	4	0	0
5111209133		female	0	0	0	0	0	0	0	0	0	0	0	0	0	0	0	0	0	0	0	1	1	0	4	3	0	4	4	0	1
5111209134		female	1	1	0	0	0	1	1	0	0	1	4	1	0	0	0	0	1	0	2	2	1	1	4	3	1	3	3	2	2
5111209135		female	1	1	1	0	1	2	0	0	0	2	6	0	1	1	0	0	0	0	2	2	3	3	3	2	0	4	3	3	1
5111209136		female	1	0	0	1	1	1	0	1	0	1	5	0	0	0	0	0	0	0	0	1	2	1	3	3	1	4	3	0	2
5111209138		female	1	1	1	1	1	0	1	0	0	1	6	0	0	0	0	0	0	0	0	3	3	2	2	2	2	3	2	2	2
5111209139		female	1	1	0	0	1	0	0	1	0	1	4	1	0	0	0	0	0	0	1	2	2	3	4	2	1	2	3	2	1
5111209150		female	0	1	0	0	0	1	0	0	0	1	2	1	0	0	0	0	0	0	1	1	0	1	4	3	0	3	4	2	2
5111209151		female	0	0	1	1	2	0	0	0	0	1	4	1	1	1	1	0	0	0	4	1	1	3	3	3	1	4	4	1	1
5111209153		female	0	1	0	1	0	1	0	0	0	1	3	1	1	1	1	0	0	0	4	3	2	2	1	3	2	1	2	3	2
5111209154		female	0	0	1	0	0	0	0	0	0	1	1	1	0	0	0	0	0	0	1	1	1	3	3	2	1	3	3	2	1
5111209155		female	0	1	0	1	1	1	1	0	0	1	5	1	1	1	1	0	1	0	5	2	2	2	4	3	1	4	3	1	3
5111209156		female	0	0	0	0	0	0	0	0	0	0	0	0	0	0	0	0	0	0	0	1	1	1	1	3	1	3	3	1	1
5111209157		female	1	0	0	1	0	0	0	0	0	1	2	1	0	1	0	1	1	0	4	1	2	1	3	4	1	3	3	1	0
5111209158		female	0	0	0	1	0	0	0	0	0	1	1	1	0	1	1	0	0	0	3	2	0	2	4	3	1	4	4	1	2
5111209160		female	0	0	0	0	3	0	0	0	0	1	3	0	0	0	0	0	0	0	0	0	0	0	4	3	0	4	4	0	0
5111209161		female	1	1	0	0	0	1	0	0	0	2	3	1	0	1	1	0	1	0	4	2	2	2	2	2	1	3	3	1	1
5111209162		female	1	1	0	0	0	0	0	0	0	2	2	0	0	0	0	0	0	0	0	1	1	2	3	2	2	4	3	1	2
5111209163		female	1	1	0	1	1	0	1	0	0	1	5	1	0	1	1	0	0	0	3	2	2	2	3	3	1	4	3	1	1
5111209165		female	1	1	0	0	1	0	0	0	0	1	3	0	0	0	0	0	0	0	0	1	0	2	4	4	0	4	4	0	1
5111209174		female	1	1	0	1	1	1	0	0	0	1	5	1	0	1	0	0	0	0	2	1	1	1	3	3	1	3	3	1	1
5111209176		female	1	1	1	1	0	1	1	0	0	2	6	1	0	1	0	0	1	1	4	2	3	2	1	1	2	3	1	2	2
5111209177		female	1	1	2	1	1	1	1	0	1	2	9	1	0	1	1	0	1	0	4	2	2	2	3	3	2	3	3	2	2
5111209178		female	1	1	0	1	0	0	1	0	0	1	4	1	0	0	0	0	0	0	1	1	1	1	3	3	1	3	3	1	1
5111209179		female	1	1	0	1	0	0	2	2	0	2	7	2	2	2	2	2	2	0	12	2	2	2	3	4	2	3	3	3	3
5111209180		female	1	1	1	1	1	1	1	0	0	2	7	1	1	1	0	1	0	1	5	2	2	2	2	1	2	2	2	2	2
5111209183		female	1	0	0	1	0	1	2	0	0	1	5	1	0	0	0	0	0	0	1	2	2	2	2	3	1	3	2	1	3
5111209184		female	0	0	0	0	0	0	0	0	0	0	0	0	0	0	0	0	0	0	0	0	0	2	4	3	0	3	4	1	0
5111209185		female	1	1	2	2	1	1	1	0	0	2	9	1	0	1	1	1	0	0	4	2	1	2	3	2	1	4	3	0	2
5111209186		female	0	2	1	0	1	1	1	0	1	1	7	2	0	1	0	1	1	0	5	2	1	2	3	2	1	4	3	1	0
5111209188		female	1	1	0	1	1	0	0	0	0	2	4	0	0	0	0	0	0	0	0	2	1	1	3	2	1	3	3	1	1
5111209293		female	0	0	0	0	0	0	0	0	0	0	0	0	0	0	0	0	0	0	0	0	0	0	4	4	0	2	4	2	1
5111209294		female	1	0	1	0	0	0	0	0	0	1	2	0	0	0	0	0	0	0	0	1	0	1	4	4	1	3	4	2	1
5111209295		female	2	0	0	0	0	0	1	0	0	1	3	1	0	0	0	0	0	1	2	0	0	2	1	3	1	2	2	2	1
5111209296		female	1	0	0	0	1	0	0	0	0	1	2	0	0	0	0	0	0	0	0	1	1	2	3	3	2	3	2	1	1
5111209297		female	1	1	0	1	1	1	0	1	0	2	6	1	1	1	1	1	1	0	6	1	2	2	3	3	1	4	3	1	1
5111209298		female	0	0	0	0	0	0	0	0	0	0	0	0	0	0	0	0	0	0	0	1	1	1	4	4	0	4	4	1	0
5111209299		female	0	0	0	0	0	0	0	0	0	0	0	0	0	0	0	0	0	0	0	0	0	1	3	3	0	3	3	1	1
5111209300		female	0	0	0	1	0	0	0	0	0	1	1	0	0	0	0	0	0	0	0	1	0	0	3	3	0	3	3	1	1
5111209301		female	1	1	1	1	1	0	1	0	0	2	6	0	0	0	1	0	0	0	1	0	0	1	4	4	1	4	3	1	1
5111209302		female	0	0	0	0	0	0	0	0	0	0	0	0	0	0	0	0	0	0	0	1	1	1	2	2	1	3	3	1	1
5111209327		female	0	0	0	1	1	1	0	0	0	1	3	1	0	1	0	0	0	1	3	2	3	2	4	3	1	4	4	1	2
5111419038		female	1	0	0	1	1	0	0	0	0	1	3	1	0	1	0	0	1	0	3	2	1	1	3	3	1	3	3	2	1
5111209004		female	0	0	1	1	1	0	1	0	0	1	4	1	0	0	0	0	1	0	2	1	1	1	3	3	1	3	3	2	1
5111209005		female	0	0	0	0	0	0	0	0	0	0	0	0	0	0	0	0	0	0	0	1	1	1	3	3	1	3	3	1	1
5111209006		female	2	2	1	1	0	1	0	0	0	2	7	2	2	3	1	0	1	0	9	1	2	3	3	2	1	2	2	2	3
5111209007		female	1	1	0	1	1	1	1	0	0	2	6	1	0	1	1	0	0	0	3	2	2	1	2	3	2	4	3	2	2
5111209010		female	1	0	1	1	0	0	0	0	0	2	3	0	0	1	1	0	0	0	2	1	1	1	3	3	1	3	3	1	1
5111209011		female	1	1	0	1	0	1	0	0	0	1	4	1	1	1	1	0	1	0	5	2	2	2	3	3	1	4	4	2	2
5111209080		female	0	0	1	1	0	0	0	0	0	1	2	0	0	0	0	0	0	0	0	0	0	0	0	0	0	4	4	0	0
5111209101		female	1	0	1	1	1	1	0	0	0	1	5	1	0	1	0	0	0	0	2	2	1	1	3	3	1	3	3	2	1
5111209107		female	1	1	1	1	1	1	1	0	0	1	7	1	0	1	0	0	1	1	4	2	2	2	2	2	1	2	2	2	2
5111209109		female	1	1	0	1	1	1	2	0	0	1	7	1	1	0	1	1	1	0	5	2	2	2	2	2	1	3	2	2	2
5111209159		female	0	0	0	0	0	0	0	0	0	0	0	0	0	0	0	0	0	0	0	0	1	1	4	4	0	4	4	0	1
5111209181		female	1	1	0	1	3	2	2	0	0	1	10	1	2	2	2	0	1	2	10	2	2	3	2	2	3	4	3	3	2
5111209182		female	1	1	0	1	1	1	0	0	0	1	5	1	1	1	1	0	1	1	6	2	3	3	2	2	2	3	2	2	2
5110309063		male	1	1	0	0	0	0	0	0	0	1	2	0	0	0	0	0	0	0	0	0	1	1	4	3	2	3	4	1	1
5111209016		male	2	1	0	1	0	1	0	1	0	2	6	1	1	1	2	1	1	0	7	2	2	2	2	2	2	3	2	1	3
5111209020		male	1	1	1	1	1	1	1	1	0	2	8	1	1	1	1	1	1	1	7	2	2	2	2	2	2	2	2	2	2
5111209021		male	0	0	0	1	1	0	0	0	0	1	2	0	0	1	0	0	0	0	1	2	2	2	2	2	2	2	2	2	2
5111209022		male	0	0	0	0	0	0	0	0	0	0	0	0	0	0	0	0	0	0	0	2	2	1	3	2	1	2	3	2	2
5111209023		male	1	1	1	1	0	1	1	1	1	2	8	1	1	2	1	1	1	1	8	2	2	2	3	2	2	3	3	3	3
5111209024		male	1	1	0	1	1	0	1	0	0	1	5	0	0	0	0	0	0	0	0	0	0	0	4	4	1	4	4	0	1
5111209045		male	0	0	0	1	0	0	0	0	0	1	1	0	0	1	0	0	0	0	1	1	0	1	3	3	1	4	3	0	1
5111209048		male	1	1	0	1	1	1	1	1	1	2	8	1	1	1	1	1	1	1	7	3	2	2	1	2	2	2	2	2	2
5111209049		male	1	1	0	1	1	1	1	1	1	1	8	1	1	1	1	1	1	1	7	2	2	2	2	2	2	2	2	2	2
5111209050		male	1	0	0	1	2	1	0	0	0	1	5	1	0	1	0	0	0	0	2	3	3	2	4	2	1	4	4	1	3
5111209052		male	1	0	0	1	0	1	0	0	0	2	3	1	1	1	1	1	1	1	7	2	2	2	2	2	2	2	2	2	2
5111209069		male	0	1	0	1	0	0	0	0	0	1	2	0	0	0	0	0	0	0	0	1	1	1	3	3	1	4	3	1	1
5111209072		male	1	0	1	0	0	1	1	1	0	2	5	0	0	0	0	0	0	0	0	1	1	1	4	4	1	4	4	1	0
5111209073		male	1	1	1	1	1	1	1	1	1	2	9	1	1	1	1	1	1	1	7	2	2	2	2	2	2	2	2	2	2
5111209092		male	0	1	0	0	1	0	1	0	0	1	3	1	0	1	0	0	1	1	4	2	2	1	4	2	2	4	4	2	2
5111209098		male	0	0	0	1	0	0	0	0	0	1	1	0	0	0	0	0	0	0	0	1	1	2	3	3	1	3	3	1	1
5111209116		male	1	1	1	0	0	0	0	0	0	1	3	0	0	0	1	0	0	0	1	2	1	1	4	3	1	3	4	2	1
5111209117		male	0	0	1	1	1	0	0	0	0	2	3	1	1	1	1	0	0	0	4	2	1	2	3	2	1	3	3	1	1
5111209119		male	0	0	1	1	0	0	0	0	0	2	2	0	0	0	0	0	0	0	0	1	2	2	2	2	1	4	2	1	2
5111209120		male	0	0	0	0	0	0	0	0	0	0	0	0	0	0	0	0	0	0	0	0	0	0	4	4	0	0	4	0	0
5111209121		male	0	0	0	1	0	0	1	0	0	1	2	0	1	0	0	0	0	0	1	1	1	2	2	3	1	2	2	1	2
5111209123		male	0	0	0	0	0	0	0	0	0	0	0	0	0	0	0	0	0	0	0	2	2	2	3	2	1	3	3	2	2
5111209124		male	0	0	0	0	0	0	1	0	0	1	1	0	0	0	0	0	0	0	0	1	1	1	4	4	1	4	4	2	1
5111209141		male	0	0	0	0	0	0	0	0	0	0	0	0	0	0	0	0	0	0	0	0	0	0	4	4	0	4	4	0	0
5111209143		male	1	1	1	1	0	0	0	0	0	1	4	0	0	0	0	0	0	0	0	2	2	2	2	2	2	2	2	2	2
5111209144		male	0	0	0	0	0	0	0	0	0	0	0	1	0	0	0	1	0	0	2	1	1	1	4	4	0	4	4	1	0
5111209145		male	0	1	1	1	0	0	0	0	0	2	3	3	0	0	3	0	0	0	6	1	1	1	1	1	1	1	1	1	1
5111209146		male	1	0	0	1	1	0	1	0	0	1	4	1	0	1	0	0	0	0	2	2	1	1	4	3	1	2	3	2	1
5111209147		male	1	1	0	1	1	1	1	0	0	1	6	1	0	1	0	1	0	0	3	3	2	2	3	2	2	4	2	1	2
5111209148		male	1	0	0	1	1	1	1	0	0	1	5	1	0	0	1	0	0	0	2	1	1	1	2	3	1	2	3	1	1
5111209149		male	1	2	0	1	1	1	0	0	0	1	6	2	2	2	1	1	1	1	10	3	2	3	2	1	1	2	3	2	2
5111209167		male	1	1	1	1	0	1	0	0	0	2	5	2	1	2	1	0	1	1	8	2	1	4	3	1	2	3	2	3	1
5111209168		male	1	1	2	1	1	0	1	0	0	1	7	1	1	1	0	1	1	1	6	1	1	1	3	3	1	4	3	1	1
5111209170		male	0	0	1	1	0	0	1	0	0	1	3	0	0	1	1	0	0	0	2	3	2	2	3	3	2	4	4	1	3
5111209171		male	1	1	0	1	1	1	0	0	0	2	5	1	0	0	0	0	1	0	2	1	1	2	3	2	1	4	3	1	2
5111209172		male	0	1	0	0	0	0	1	1	0	1	3	1	1	0	1	0	0	0	3	1	1	1	3	3	3	3	3	1	1
5111209173		male	0	0	0	0	0	0	0	0	0	0	0	1	0	1	1	0	0	0	3	2	2	3	3	3	2	4	4	0	1
5111209191		male	0	0	0	0	0	0	0	0	0	0	0	0	0	0	0	0	0	0	0	0	0	0	0	0	0	4	4	0	0
5111209192		male	1	0	1	1	1	0	2	0	0	1	6	1	0	1	0	0	0	0	2	0	0	1	4	3	2	3	3	1	1
5111209197		male	1	0	1	1	0	1	0	0	0	1	4	0	0	1	0	0	0	0	1	1	1	1	2	2	1	1	2	2	2
5111209303		male	0	0	0	0	0	0	0	0	0	0	0	0	0	0	0	0	0	0	0	1	1	1	1	1	1	1	1	1	1
5111209305		male	1	1	0	1	1	0	0	0	0	1	4	0	0	0	0	0	0	0	0	1	1	1	3	3	1	3	3	2	1
5111209309		male	0	0	0	0	0	0	0	0	0	0	0	0	0	0	0	0	0	0	0	0	0	0	4	3	1	4	4	0	0
5111209315		male	1	1	1	1	1	1	0	1	1	2	8	0	0	0	0	1	0	0	1	1	1	1	3	3	3	3	3	1	1
5111209321		male	3	3	3	2	2	0	3	0	0	1	16	3	2	1	3	2	3	2	16	2	2	4	4	2	3	1	3	4	3
5111209324		male	0	0	0	0	0	0	0	0	0	0	0	1	1	0	0	1	1	0	4	2	2	2	4	3	1	3	3	2	2
5111209093		male	1	0	1	0	1	0	0	0	0	1	3	0	0	0	0	0	0	0	0	1	1	1	2	2	1	1	2	2	2
5111209094		male	1	1	1	2	1	1	2	0	0	2	9	1	0	1	0	0	0	0	2	2	2	2	2	3	1	3	3	1	1
5111209096		male	1	1	1	1	1	1	1	1	1	2	9	1	1	1	1	1	0	0	5	2	3	2	2	1	2	1	2	2	2
5111209099		male	2	2	1	1	0	2	2	2	1	3	13	1	2	1	1	2	1	2	10	3	2	3	1	0	2	3	2	3	3
5111209190		male	1	1	1	1	1	1	1	0	0	1	7	1	1	1	0	0	0	1	4	2	2	1	3	3	1	4	3	0	3
5111209195		male	1	1	0	0	0	0	0	0	0	1	2	1	0	0	0	0	0	0	1	1	3	2	3	3	1	4	3	2	1
5111209196		male	1	1	1	1	1	1	1	0	0	1	7	1	0	1	1	1	1	0	5	2	2	2	3	3	2	3	3	2	2
5111209198		male	1	1	1	1	0	0	0	0	0	1	4	1	0	0	0	0	0	0	1	2	2	2	3	2	1	3	3	1	2
